# Supplementary material
Source: PubMed Central journal article supplement (PMC7815516)
Supplement: 41380_2018_246_MOESM1_ESM.pdf [file 41380_2018_246_MOESM1_ESM.pdf]

## Supplementary Material

### Genome-wide association study of brain amyloid deposition as measured by Pittsburgh Compound-B (PiB)-PET imaging

Qi Yan PhD<sup>1,2</sup>, Kwangsik Nho PhD<sup>3,4</sup>, Jorge L. Del-Aguila PhD<sup>5</sup>, Xingbin Wang PhD<sup>1</sup>, Shannon L. Risacher PhD<sup>3,4</sup>, Kang-Hsien Fan PhD<sup>1</sup>, Beth E. Snitz PhD<sup>6,7</sup>, Howard J. Aizenstein PhD<sup>8</sup>, Chester A. Mathis PhD<sup>7,9</sup>, Oscar L. Lopez MD<sup>6,7,8</sup>, F. Yesim Demirci MD<sup>1</sup>, Eleanor Feingold PhD<sup>1</sup>, William E. Klunk MD; PhD<sup>6,7,8</sup>, Andrew J. Saykin PsyD<sup>3,4</sup> for the Alzheimer's Disease Neuroimaging Initiative (ADNI), Carlos Cruchaga PhD<sup>5</sup>, M. Ilyas Kamboh PhD<sup>1,7,8</sup>

<sup>1</sup>Department of Human Genetics, University of Pittsburgh, Pittsburgh, PA USA

<sup>2</sup>Department of Pediatrics, Children's Hospital of Pittsburgh of UPMC, University of Pittsburgh, Pittsburgh, PA USA

<sup>3</sup>Department of Radiology and Imaging Sciences, Indiana University School of Medicine, Indianapolis, IN USA

<sup>4</sup>Indiana Alzheimer Disease Center, Indiana University School of Medicine, Indianapolis, IN USA

<sup>5</sup>Department of Psychiatry, Washington University School of Medicine, St. Louis, MO USA

<sup>6</sup>Department of Neurology, University of Pittsburgh, Pittsburgh, PA USA

<sup>7</sup>Alzheimer Disease Research Center, University of Pittsburgh, Pittsburgh, PA USA

<sup>8</sup>Department of Psychiatry, University of Pittsburgh, Pittsburgh, PA USA

<sup>9</sup>Department of Radiology, University of Pittsburgh, Pittsburgh, PA USA

Running title: GWAS of brain amyloidosis as measured by PiB-PET

Keywords: Brain amyloid, amyloid-PET, GWAS, meta-analysis

Address for correspondence:

M. Ilyas Kamboh, PhD

Department of Human Genetics, Graduate School of Public Health

University of Pittsburgh, PA 15261, USA

E-mail: [kamboh@pitt.edu](mailto:kamboh@pitt.edu)

## Supplementary Text

### Sample description

All subjects with PiB-PET data were European-Americans and derived from three sites: University of Pittsburgh (PITT), Washington University (WU) and Indiana University (IU) combined with the initial phase of the multicenter ADNI PiB-PET add-on study (here they are referred to as ADNI/IU). All subjects provided informed consent and all studies were approved by their local Institutional Review Boards. The summary statistics of these samples are included in Supplementary Table S1.

The PITT sample comprised a total of 361 subjects with age 36 to 97 years (mean age=78.3±10.1) and they were derived from the Ginkgo Evaluation of Memory Study (GEMS) imaging sub-study<sup>1</sup>, healthy aging study<sup>2</sup> or the PITT-Alzheimer's Disease Research Center (ADRC). The WU sample consisted of 495 Subjects with age 37 to 88 years (mean age=65.8±9.8) and they were recruited as part of the WU-Knight ADRC in St. Louis.<sup>3</sup> A total of 127 subjects with age 55 to 88 years (mean age=73.8±7.6) were collected as part of the ADNI and the Indiana Memory and Aging Study.<sup>4-7</sup>

### Genotyping, imputation and quality control

The genotyping platforms used for each study sample are listed in Supplementary Table S1. Imputation of non-genotyped single-nucleotide polymorphisms (SNPs) was performed with IMPUTE2<sup>8</sup> using the 1000 Genomes Project<sup>9</sup> Phase III (May 2013 release) data as the reference panel for PITT and Phase I (November 2010 release) data for WU and ADNI/IU datasets. In the PITT sample, SNPs with the imputation info score <0.5, the minor allele frequency (MAF) <0.01,  $P < 1E-06$  in the Hardy Weinberg equilibrium test and the missing rate >5% were removed as well as the insertions and deletions were excluded. After quality control measures, 361 subjects and ~7 million genotyped and imputed SNPs were included in the GWAS analysis. Genetic association analysis was conducted using linear regression under an additive genetic model,

adjusting for age, gender, diagnosis, and first four principal components (PCs) calculated using smartPCA.<sup>10</sup>

As part of quality control steps in the WU sample, SNPs with minor allele frequency <1%, call rates <98%, Hardy–Weinberg equilibrium  $P > 1E-06$  and individuals with >2% missing genotypes were removed from the analysis. The quality control SNP post imputation were as follows: MAF<1%, call rates <95%, Hardy–Weinberg equilibrium  $P > 1E-06$  and  $r^2 \leq 0.3$ . Pairwise genome-wide estimates of proportion identity-by-descent were used to find duplicate and related individuals which were eliminated from the analysis. 495 subjects and ~14 million SNPs were included in the association test. Association testing was conducted using linear regression under an additive genetic model, adjusting for age, gender, diagnosis, and first two PCs calculated using PLINK v1.9 (<http://www.cog-genomics.org/plink2>) to confirm ethnicity of each sample.

In the ADNI/IU sample, SNPs with the imputation info score  $\leq 0.5$ , MAF<0.01, and  $P < 1E-06$  in the Hardy Weinberg equilibrium test were removed as well as the insertions and deletions. After performing the quality control, 127 subjects and ~8 million SNPs were used in the statistical analysis. Association analysis was performed using linear regression adjusted for age, gender, diagnosis and first three PCs.

### **Functional analyses**

To evaluate the biological significance of PiB-associated signals, we conducted five different analyses: differential gene expression in AD versus non-AD in relevant tissues, brain gene expression, expression quantitative trait loci (eQTL) analyses, summary-data-based Mendelian randomization (SMR) analyses to test for pleiotropic association between gene expression and PiB, and pathway analyses.

*Differentially expressed genes:* We searched for differentially expressed genes from the target gene list using gene expression data from AlzBase.<sup>11</sup> AlzBase (<http://alz.big.ac.cn/alzBase/>)

includes transcription data from brain and blood from aging, non-dementia, mild cognitive impairment, early stage AD and late stage AD.

*Human brain gene expression:* We evaluated the expression level of all target genes in human brain tissues from the Barres Human and Mouse Brain RNA-Seq Resource<sup>12, 13</sup> (<http://www.brainrnaseq.org/>), and listed the corresponding cell types with expressed genes.

*Expression quantitative trait loci (eQTL) analysis:* To identify potential functional risk genes at each associated locus, we first identified variants in LD ( $R^2 \geq 0.5$ ) with the top SNPs for the 16 associated loci in **Table 2**. The SNIIPA website (<https://snipa.helmholtz-muenchen.de/snipa3/>) was used to search for variants in LD, using the 1000 Genomes, Phase 3v5 variant set for the European population. The list of variants was searched for genes functionally linked via eQTLs to our expanded list of variants. The GTEx<sup>14</sup> database was searched for eQTL associations in various brain tissues and whole blood.

*Summary-data-based Mendelian randomization (SMR) analysis:* To test if the genetic effect on PiB is mediated by gene expression in specific tissues, we performed SMR analyses to test for pleiotropic association between the expression level of a gene and PiB using summary-level data from GWAS and eQTL studies.<sup>15</sup>

*Pathway analyses:* Pathway analyses were performed with MAGMA,<sup>16</sup> which performs SNP-wise gene analysis of summary statistics with correction for LD between variants and genes to test whether sets of genes are jointly associated with a phenotype (i.e. PiB), compared to other genes across the genome. Adaptive permutation was used to produce an empirical p-value and FDR. Gene-sets used in the analyses were from GO,<sup>17, 18</sup> KEGG,<sup>19, 20</sup> REACTOME,<sup>21, 22</sup> and BIOCARTA pathways.

## **Data Availability**

Upon publication, data will be submitted to the National Institute on Aging Genetics of Alzheimer's Disease (NIAGADS) data repository.

### **Association analysis of known non-APOE AD risk loci with amyloid burden**

Although none of the known AD susceptibility loci, other than *APOE*, showed significant association at  $P < 1E-05$ , we examined the top IGAP genome-wide significant SNPs (Supplementary Table S3.1) and the associated gene regions (Supplementary Table S3.2) in relation to amyloid burden. Only one IGAP variant, *HLA-DRB1,HLA-DQA1/rs2760980*;  $P=0.0093$ , was associated with global PiB retention at  $P < 0.05$ . This is a proxy for the top *HLA-DRB1,HLA-DQA1/rs9271192* SNP that was not present in our dataset. The regional analysis of these loci found nominally significance SNPs at  $P < 0.05$  in all but 4 loci (*CR1, PTK2B, PICALM, SORL1*) and 8 regions had top SNPs with  $P < 0.01$  (Supplementary Table S3.2).

### **Association of amyloid loci with AD risk**

To test if the suggestive non-*APOE* amyloid loci listed in **Table 2** are also associated with AD risk, we examined their associations in our PITT-ADRC case-control sample of >2,200 subjects.<sup>23</sup> Two top amyloid-associated SNPs showed association with AD risk at  $P < 0.05$  (Supplementary Table S4.1): one is located on chromosome 4 in *CYP4V2/rs7377304* ( $P=0.017$ ) and the other on chromosome 21 near *ICOSLG/rs55708341* ( $P=0.0136$ ). When we examined additional A $\beta$ -associated SNPs having  $P < 0.05$  in each region with AD risk, multiple SNPs with  $P < 0.05$  were found in 13 of 15 loci and 10 of them showed odds ratios and beta-values in the same directions (Supplementary Table S4.2), indicating that our suggestive A $\beta$ -associated loci are also associated with AD risk.

## Supplementary Tables

**Table S1.** Summary of characteristics of participants from the University of Pittsburgh (PITT), Washington University (WU), and the Alzheimer’s disease Neuroimaging Initiative (ADNI) and the Indiana Memory and Aging Study (ADNI/IU) included in the meta-analysis

|                                                         | PITT<br>(n=361)                       | WU<br>(n=495)                  | ADNI/IU<br>(n=127)                                 |
|---------------------------------------------------------|---------------------------------------|--------------------------------|----------------------------------------------------|
| Age in years (mean ± standard deviation)                | 78.3±10.1                             | 65.6±9.8                       | 73.8±7.6                                           |
| Male gender (n, %)                                      | 197(54.6)                             | 205(41.4)                      | 74(58.3)                                           |
| PiB (mean ± standard deviation)                         | 1.9±0.6*                              | 0.2±0.3**                      | 1.6±0.4*                                           |
| Clinical diagnosis of probable Alzheimer disease (n, %) | 43(11.9)                              | 76(15.4)                       | 32(25.2)                                           |
| Genotyping platform                                     | Illumina Omni Quad Chip; Omni2.5 Chip | Illumina 610; Omniexpress chip | Human610-Quad BeadChip; HumanOmni Express BeadChip |

\*Standardized Uptake Volume Ratio (SUVR)

\*\*Binding Potential (BP)

**Table S2.** SNPs achieving genome-wide significance ( $P < 5E-08$ ) in the meta-analysis

| SNP        | Chr | Position | A1 | A2 | Gene       | Region     | PITT |      |          | WU   |      |          | ADNI/IU |      | Meta     |      |                 |
|------------|-----|----------|----|----|------------|------------|------|------|----------|------|------|----------|---------|------|----------|------|-----------------|
|            |     |          |    |    |            |            | MAF  | Beta | P-value  | MAF  | Beta | P-value  | MAF     | Beta | P-value  | Beta | P-value         |
| rs429358   | 19  | 45411941 | C  | T  | APOE       | exonic     | 0.20 | 0.35 | 5.20E-12 | 0.21 | 0.16 | 5.36E-16 | 0.28    | 0.19 | 7.88E-05 | 0.18 | <b>9.09E-30</b> |
| rs12721051 | 19  | 45422160 | G  | C  | APOC1      | intronic   | 0.22 | 0.31 | 9.04E-10 | 0.24 | 0.12 | 7.13E-11 | 0.30    | 0.14 | 1.55E-03 | 0.14 | <b>2.60E-21</b> |
| rs4420638  | 19  | 45422946 | G  | A  | APOC1      | downstream | 0.22 | 0.31 | 1.41E-09 | 0.25 | 0.11 | 1.34E-10 | 0.30    | 0.14 | 1.55E-03 | 0.14 | <b>7.31E-21</b> |
| rs56131196 | 19  | 45422846 | A  | G  | APOC1      | downstream | 0.22 | 0.31 | 1.34E-09 | 0.25 | 0.11 | 2.84E-10 | 0.30    | 0.14 | 1.55E-03 | 0.14 | <b>1.45E-20</b> |
| rs6857     | 19  | 45392254 | T  | C  | PVRL2      | UTR3       | 0.23 | 0.29 | 8.77E-09 | 0.20 | 0.13 | 4.42E-11 | 0.27    | 0.16 | 1.71E-03 | 0.15 | <b>1.70E-20</b> |
| rs10414043 | 19  | 45415713 | A  | G  | APOE,APOC1 | intergenic | 0.16 | 0.33 | 3.57E-09 | 0.17 | 0.13 | 9.15E-11 | 0.22    | 0.16 | 2.67E-03 | 0.15 | <b>2.24E-20</b> |
| rs769449   | 19  | 45410002 | A  | G  | APOE       | intronic   | 0.16 | 0.32 | 1.36E-08 | 0.15 | 0.13 | 5.90E-11 | 0.22    | 0.16 | 3.27E-03 | 0.15 | <b>6.04E-20</b> |
| rs7256200  | 19  | 45415935 | T  | G  | APOE,APOC1 | intergenic | 0.16 | 0.32 | 1.77E-08 | 0.17 | 0.13 | 2.88E-11 | 0.21    | 0.15 | 8.82E-03 | 0.15 | <b>1.43E-19</b> |
| rs2075650  | 19  | 45395619 | G  | A  | TOMM40     | intronic   | 0.20 | 0.24 | 2.81E-06 | 0.17 | 0.12 | 9.31E-10 | 0.22    | 0.13 | 1.98E-02 | 0.13 | <b>1.06E-15</b> |
| rs34404554 | 19  | 45395909 | G  | C  | TOMM40     | intronic   | 0.20 | 0.24 | 2.37E-06 | 0.16 | 0.11 | 2.10E-09 | 0.22    | 0.13 | 1.98E-02 | 0.13 | <b>1.92E-15</b> |
| rs11556505 | 19  | 45396144 | T  | C  | TOMM40     | exonic     | 0.20 | 0.24 | 2.37E-06 | 0.17 | 0.11 | 2.23E-09 | 0.22    | 0.13 | 1.98E-02 | 0.13 | <b>2.03E-15</b> |
| rs12721046 | 19  | 45421254 | A  | G  | APOC1      | intronic   | 0.19 | 0.26 | 1.24E-06 | 0.19 | 0.11 | 1.50E-08 | 0.24    | 0.11 | 2.57E-02 | 0.13 | <b>1.01E-14</b> |
| rs438811   | 19  | 45416741 | T  | C  | APOE,APOC1 | intergenic | 0.26 | 0.21 | 1.45E-05 | 0.30 | 0.09 | 7.89E-08 | 0.32    | 0.13 | 2.31E-03 | 0.11 | <b>5.30E-14</b> |
| rs71352238 | 19  | 45394336 | C  | T  | TOMM40     | upstream   | 0.20 | 0.23 | 7.82E-06 | 0.16 | 0.11 | 2.22E-08 | 0.22    | 0.13 | 1.98E-02 | 0.12 | <b>5.70E-14</b> |
| rs483082   | 19  | 45416178 | T  | G  | APOE,APOC1 | intergenic | 0.26 | 0.21 | 1.45E-05 | 0.29 | 0.09 | 1.58E-07 | 0.32    | 0.13 | 2.31E-03 | 0.11 | <b>1.02E-13</b> |
| rs5117     | 19  | 45418790 | C  | T  | APOC1      | intronic   | 0.26 | 0.22 | 7.03E-06 | 0.28 | 0.08 | 1.17E-06 | 0.32    | 0.14 | 1.77E-03 | 0.10 | <b>2.65E-13</b> |
| rs59007384 | 19  | 45396665 | T  | G  | TOMM40     | intronic   | 0.26 | 0.21 | 1.20E-05 | 0.25 | 0.09 | 1.71E-07 | 0.30    | 0.12 | 9.68E-03 | 0.11 | <b>3.31E-13</b> |
| rs34342646 | 19  | 45388130 | A  | G  | PVRL2      | intronic   | 0.21 | 0.23 | 8.92E-06 | 0.13 | 0.17 | 1.86E-07 | 0.23    | 0.11 | 3.47E-02 | 0.17 | <b>2.05E-12</b> |
| rs12972156 | 19  | 45387459 | G  | C  | PVRL2      | intronic   | 0.19 | 0.23 | 1.51E-05 | 0.13 | 0.17 | 1.86E-07 | 0.23    | 0.11 | 3.47E-02 | 0.17 | <b>3.52E-12</b> |
| rs12972970 | 19  | 45387596 | A  | G  | PVRL2      | intronic   | 0.20 | 0.23 | 1.58E-05 | 0.13 | 0.17 | 1.86E-07 | 0.23    | 0.11 | 3.47E-02 | 0.17 | <b>3.71E-12</b> |
| rs157582   | 19  | 45396219 | T  | C  | TOMM40     | intronic   | 0.27 | 0.20 | 2.91E-05 | 0.28 | 0.09 | 9.19E-07 | 0.31    | 0.11 | 2.29E-02 | 0.10 | <b>8.92E-12</b> |
| rs157581   | 19  | 45395714 | C  | T  | TOMM40     | exonic     | 0.27 | 0.20 | 3.60E-05 | 0.28 | 0.09 | 7.42E-07 | 0.31    | 0.11 | 2.29E-02 | 0.10 | <b>9.19E-12</b> |
| rs283815   | 19  | 45390333 | G  | A  | PVRL2      | intronic   | 0.27 | 0.21 | 1.41E-05 | 0.23 | 0.15 | 8.86E-06 | 0.31    | 0.11 | 2.29E-02 | 0.15 | <b>9.15E-11</b> |
| rs34095326 | 19  | 45395844 | A  | G  | TOMM40     | intronic   | 0.17 | 0.19 | 5.59E-04 | 0.11 | 0.12 | 9.67E-08 | 0.17    | 0.09 | 1.36E-01 | 0.12 | <b>1.50E-10</b> |
| rs184017   | 19  | 45394969 | G  | T  | TOMM40     | intronic   | 0.27 | 0.20 | 2.55E-05 | 0.24 | 0.15 | 2.34E-05 | 0.31    | 0.11 | 2.29E-02 | 0.15 | <b>3.43E-10</b> |
| rs10119    | 19  | 45406673 | A  | G  | TOMM40     | UTR3       | 0.32 | 0.14 | 3.39E-03 | 0.31 | 0.16 | 4.50E-07 | 0.37    | 0.14 | 9.84E-04 | 0.15 | <b>4.31E-10</b> |
| rs75627662 | 19  | 45413576 | T  | C  | APOE       | downstream | 0.23 | 0.14 | 3.49E-03 | 0.23 | 0.07 | 3.28E-05 | 0.26    | 0.10 | 2.34E-02 | 0.08 | <b>3.58E-08</b> |

A1: minor allele; A2: major allele.

**Table S3.1.** Association of top IGAP SNPs with PiB-PET

| <b>IGAP Locus/SNP</b>                | <b>Chr</b> | <b>IGAP <i>P</i>-value</b> | <b>Meta PiB <i>P</i>-value</b> |
|--------------------------------------|------------|----------------------------|--------------------------------|
| <i>CR1</i> /rs6656401                | 1          | 5.70E-24                   | 0.7552                         |
| <i>BIN1</i> /rs10200967*             | 2          | 2.24E-35                   | 0.5425                         |
| <i>INPP5D</i> /rs35349669            | 2          | 3.20E-08                   | 0.05966                        |
| <i>CASS4</i> /rs7274581              | 5          | 2.50E-08                   | 0.2891                         |
| <i>MEF2C</i> /rs190982               | 5          | 3.20E-08                   | 0.9975                         |
| <i>CD2AP</i> /rs10948363             | 6          | 5.20E-11                   | 0.7107                         |
| <i>HLA-DRB5,HLA-DRB1</i> /rs2760980* | 6          | 4.03E-51                   | 0.009257                       |
| <i>EPHA1</i> /rs11771145             | 7          | 1.10E-13                   | 0.1628                         |
| <i>NME8</i> /rs2718058               | 7          | 4.80E-09                   | 0.2263                         |
| <i>SORL1</i> /rs11218343             | 7          | 9.70E-15                   | 0.1851                         |
| <i>ZCWPW1</i> /rs1476679             | 7          | 5.60E-10                   | 0.5949                         |
| <i>CLU</i> /rs17057043*              | 8          | 2.13E-20                   | 0.5606                         |
| <i>PTK2B</i> /rs28834970             | 8          | 7.40E-14                   | 0.4002                         |
| <i>CELF1</i> /rs10838725             | 11         | 1.10E-08                   | 0.07309                        |
| <i>MS4A6A</i> /rs983392              | 11         | 6.10E-16                   | 0.8271                         |
| <i>PICALM</i> /rs10792832            | 11         | 9.30E-26                   | 0.1104                         |
| <i>FERMT2</i> /rs17125944            | 14         | 7.90E-09                   | 0.2323                         |
| <i>SLC24A4,RIN3</i> /rs10498633      | 14         | 5.50E-09                   | 0.2475                         |
| <i>ABCA7</i> /rs4147929              | 19         | 1.10E-15                   | 0.3858                         |

\*Proxy SNP for the top IGAP SNP



**Table S3.2.** Regional association of IGAP loci with PiB-PET

| IGAP Locus               | Start BP  | End BP    | Total SNPs in the region | # of SNPs <0.05 | Top SNP in the region            | Chr | Position  | A1 | A2 | Beta  | P-value |
|--------------------------|-----------|-----------|--------------------------|-----------------|----------------------------------|-----|-----------|----|----|-------|---------|
| <i>CR1</i>               | 207669924 | 207814835 | 142                      | 0               | <i>CR1</i> /rs7542494            | 1   | 207809744 | A  | G  | -0.04 | 0.0684  |
| <i>BIN1</i>              | 127806605 | 127864546 | 189                      | 5               | <i>BIN1</i> /rs17014818          | 2   | 127810697 | T  | C  | -0.03 | 0.0325  |
| <i>INPP5D</i>            | 233743532 | 234115739 | 824                      | 30              | <i>INPP5D</i> /rs12052961        | 2   | 234076434 | A  | G  | -0.04 | 0.0043  |
| <i>MEF2C</i>             | 87963600  | 88199223  | 238                      | 1               | <i>MEF2C-AS1</i> /rs13159808     | 5   | 88194669  | A  | T  | 0.03  | 0.0290  |
| <i>HLA-DRB5/HLA-DRB1</i> | 32261252  | 32826450  | 3780                     | 128             | <i>HLA-DQB1</i> /rs28746853      | 6   | 32634646  | C  | T  | 0.04  | 0.0022  |
| <i>CD2AP</i>             | 47445789  | 47688606  | 646                      | 9               | <i>GPR111</i> /rs7764134         | 6   | 47655330  | A  | T  | 0.03  | 0.0104  |
| <i>NME8</i>              | 37780799  | 37939840  | 439                      | 52              | <i>NME8</i> /rs1823519           | 7   | 37915816  | A  | C  | 0.06  | 0.0065  |
| <i>ZCWPW1</i>            | 99488543  | 100200674 | 794                      | 10              | <i>AZGP1P1</i> /rs10953293       | 7   | 99579032  | G  | A  | -0.06 | 0.0073  |
| <i>EPHA1</i>             | 143014244 | 143218545 | 408                      | 4               | <i>CLCN1,FAM131B</i> /rs7806322  | 7   | 143049965 | T  | C  | -0.06 | 0.0188  |
| <i>PTK2B</i>             | 27094615  | 27402132  | 652                      | 0               | <i>PTK2B</i> /rs35575787         | 8   | 27187520  | T  | G  | -0.04 | 0.0547  |
| <i>CLU</i>               | 27183710  | 27695123  | 1289                     | 1               | <i>EPHX2,CLU</i> /rs1532275      | 8   | 27424988  | A  | G  | 0.06  | 0.0496  |
| <i>CELF1</i>             | 47186424  | 47868853  | 907                      | 98              | <i>DDB2</i> /rs2291120           | 11  | 47237680  | C  | T  | 0.12  | 0.0010  |
| <i>MS4A6A</i>            | 59807796  | 60108278  | 631                      | 13              | <i>MS4A6A,MS4A4A</i> /rs11230208 | 11  | 60008547  | A  | C  | 0.06  | 0.0107  |
| <i>PICALM</i>            | 85566157  | 85779310  | 486                      | 0               | <i>PICALM</i> /rs7951357         | 11  | 85762557  | G  | A  | 0.04  | 0.0552  |
| <i>SORL1</i>             | 121328954 | 121502894 | 190                      | 0               | <i>SORL1</i> /rs17245976         | 11  | 121365720 | T  | G  | -0.04 | 0.0944  |
| <i>FERMT2</i>            | 53109716  | 53417538  | 427                      | 78              | <i>STYX</i> /rs10483618          | 14  | 53203590  | C  | T  | 0.08  | 0.0016  |
| <i>SLC24A4</i>           | 92791068  | 93153606  | 1005                     | 60              | <i>SLC24A4</i> /rs72695119       | 14  | 92838693  | A  | G  | 0.09  | 0.0060  |
| <i>ABCA7</i>             | 841398    | 1275987   | 680                      | 44              | <i>PRTN3</i> /rs629631           | 19  | 846041    | T  | C  | 0.11  | 0.0012  |
| <i>CASS4</i>             | 54968038  | 55111371  | 241                      | 2               | <i>CASS4</i> /rs6127744          | 20  | 54986274  | T  | G  | 0.06  | 0.0278  |

**Table S4.1.** Association of top non-APOE PiB-PET variants with AD risk in a case-control sample of >2,200 subjects (Kamboh et al. *Mol Psychiatry* 2012; 2:e117)

| <b>Top PiB-PET Locus/SNP</b>           | <b>Odds Ratio</b> | <b>P-value</b> |
|----------------------------------------|-------------------|----------------|
| <i>ADCY8, EFR3A/rs13260032</i>         | 1.050             | 0.4419         |
| <i>RAP2B, C3orf79/rs4680057</i>        | 0.995             | 0.9258         |
| <i>DAPK2/rs12908891</i>                | 1.118             | 0.07431        |
| <i>CYP4V2/rs7377304</i>                | 0.862             | 0.01727        |
| <i>C21orf33, ICOSLG/rs55708341</i>     | 1.206             | 0.01365        |
| <i>LINC00971/rs9831119</i>             | 0.918             | 0.3492         |
| <i>SLITRK1/rs9531483</i>               | 0.985             | 0.8269         |
| <i>C2orf80, IDH1/rs6722000</i>         | 1.001             | 0.8912         |
| <i>MAGEF1, LOC101928992/rs11923588</i> | 0.924             | 0.5286         |
| <i>DTHD, MIR4801/rs66837203</i>        | 1.204             | 0.1694         |
| <i>HTN1/rs200028958</i>                | 0.907             | 0.3367         |
| <i>HSD17B6, SDR9C7/rs4526799</i>       | 1.002             | 0.9728         |
| <i>ELTD1, LPHN2/rs17105538</i>         | 1.176             | 0.06483        |
| <i>LINC01250/rs62121100</i>            | 1.053             | 0.5476         |
| <i>KCNF, FLJ33534/rs1809136</i>        | 0.865             | 0.2300         |

**Table S4.2.** Regional association of top non-APOE PiB-PET loci with AD risk in a case-control maple of >2,200 subjects (Kamboh et al. *Mol Psychiatry* 2012; 2:e117 ). For comparison PiB *P* and beta values are also given for the top corresponding AD risk SNP

| Association of PiB-PET gene regions with AD risk |     |              |            |                |                |               |                                         |             |                    |                      |              |                  |
|--------------------------------------------------|-----|--------------|------------|----------------|----------------|---------------|-----------------------------------------|-------------|--------------------|----------------------|--------------|------------------|
| PiB-PET Locus                                    | Chr | Region Start | Region End | Total PiB SNPs | PiB SNPs <0.05 | AD SNPs <0.05 | Top AD Risk SNP in the region           | A1 from PiB | AD risk Odds Ratio | <i>P</i> for AD Risk | Beta for PiB | <i>P</i> for PiB |
| <i>ADCY8, EFR3A</i>                              | 8   | 131951455    | 132951455  | 2290           | 303            | 110           | <i>ADCY8, EFR3A</i> /rs9693785          | C           | 0.7272             | 0.0004175            | -0.056907    | 0.007005         |
| <i>RAP2B, C3orf79</i>                            | 3   | 152596985    | 153596985  | 2377           | 359            | 11            | <i>C3orf79, ARHGEF26-AS1</i> /rs7649472 | G           | 1.156              | 0.02487              | 0.024879     | 0.04522          |
| <i>DAPK2</i>                                     | 15  | 63736441     | 64736441   | 1626           | 165            | 11            | <i>DAPK2</i> /rs1380843                 | A           | 0.8621             | 0.02232              | -0.053325    | 0.005655         |
| <i>CYP4V2</i>                                    | 4   | 186629780    | 187629780  | 2445           | 177            | 13            | <i>CYP4V2</i> /rs1053094                | A           | 1.1763             | 0.009745             | 0.058916     | 0.002189         |
| <i>C21orf33, ICOSLG</i>                          | 21  | 45127581     | 46127581   | 2199           | 227            | 73            | <i>C21orf33, ICOSLG</i> /rs2070554      | T           | 1.237              | 0.00879              | 0.037261     | 0.002774         |
| <i>LINC00971</i>                                 | 3   | 84212077     | 85212077   | 2480           | 657            | 1             | <i>CADM2</i> /rs13075478                | T           | 1.152              | 0.02369              | 0.028393     | 0.02801          |
| <i>SLITRK1</i>                                   | 13  | 83744873     | 84744873   | 1677           | 312            | 6             | <i>SLITRK1</i> /rs9602135               | G           | 0.7734             | 0.01895              | 0.042266     | 0.0297           |
| <i>C2orf80, IDH1</i>                             | 2   | 208575957    | 209575957  | 1562           | 188            | 0             | <i>C2orf80, IDH1</i> /rs71418664        | A           | 0.8554             | 0.06475              | 0.058783     | 0.00121          |
| <i>MAGEF1, LOC101928992</i>                      | 3   | 183959667    | 184959667  | 1774           | 72             | 1             | <i>EIF4G1</i> /rs9846954                | T           | 1.164              | 0.03531              | -0.034909    | 0.04058          |
| <i>DTHD, MIR4801</i>                             | 4   | 36397136     | 37397136   | 3117           | 91             | 4             | <i>DTHD1, MIR4801</i> /rs1319729        | G           | 1.321              | 0.008938             | 0.039352     | 0.002278         |
| <i>HTN1</i>                                      | 4   | 70423661     | 71423661   | 3151           | 465            | 42            | <i>HTN1</i> /rs6854359                  | A           | 1.176              | 0.01454              | -0.038333    | 0.00506          |
| <i>HSD17B6, SDR9C7</i>                           | 12  | 56780586     | 57780586   | 1132           | 95             | 0             | <i>HSD17B6, SDR9C7</i> /rs1846400       | A           | 0.9274             | 0.2208               | -0.028111    | 0.0117           |
| <i>ELTD1, LPHN2</i>                              | 1   | 80815043     | 81815043   | 2130           | 159            | 11            | <i>ELTD1, LPHN2</i> /rs10874177         | C           | 1.2                | 0.008051             | 0.041764     | 0.002923         |
| <i>LINC01250</i>                                 | 2   | 2593952      | 3593952    | 2434           | 267            | 7             | <i>MYT1L, LINC01250</i> /rs12617695     | T           | 1.447              | 0.002762             | 0.062219     | 0.04794          |
| <i>KCNF, FLJ33534</i>                            | 2   | 10652180     | 11652180   | 2394           | 209            | 10            | <i>KCNF1, FLJ33534</i> /rs7556946       | C           | 1.507              | 0.004408             | -0.102457    | 0.04779          |

**Table S5. The eQTL and SMR P-values for the top non-APOE region SNPs from Table 1**

| Tissue                                | Chr | Gene            | Probe bp  | SNP        | SNP bp    | A1 | A2 | Freq | p GWAS   | p eQTL   | p SMR    |
|---------------------------------------|-----|-----------------|-----------|------------|-----------|----|----|------|----------|----------|----------|
| Brain Amygdala                        | 8   | ADCY8           | 131923609 | rs13260032 | 132451455 | C  | A  | 0.43 | 4.87E-07 | 1.54E-02 | 3.27E-02 |
| Brain Frontal Cortex BA9              | 8   | ADCY8           | 131923609 | rs13260032 | 132451455 | C  | A  | 0.43 | 4.87E-07 | 4.75E-02 | 6.96E-02 |
| Brain Putamen basal ganglia           | 8   | ADCY8           | 131923609 | rs13260032 | 132451455 | C  | A  | 0.43 | 4.87E-07 | 2.86E-02 | 4.88E-02 |
| Brain Spinal cord cervical c-1        | 8   | ADCY8           | 131923609 | rs13260032 | 132451455 | C  | A  | 0.43 | 4.87E-07 | 1.77E-02 | 3.57E-02 |
| Brain Anterior cingulate cortex BA24  | 3   | RP11-38P22.2    | 152558203 | rs4680057  | 153096985 | A  | G  | 0.44 | 9.69E-07 | 2.43E-02 | 4.72E-02 |
| Brain Hippocampus                     | 3   | RP11-38P22.2    | 152558203 | rs4680057  | 153096985 | A  | G  | 0.44 | 9.69E-07 | 1.58E-02 | 3.64E-02 |
| Brain Nucleus accumbens basal ganglia | 3   | RAP2B           | 152883147 | rs4680057  | 153096985 | A  | G  | 0.44 | 9.69E-07 | 2.00E-02 | 4.19E-02 |
| Brain Spinal cord cervical c-1        | 3   | RP11-23D24.2    | 153400349 | rs4680057  | 153096985 | A  | G  | 0.44 | 9.69E-07 | 1.51E-02 | 3.54E-02 |
| Whole Blood                           | 3   | ARHGEF26        | 153907204 | rs4680057  | 153096985 | A  | G  | 0.44 | 9.69E-07 | 1.31E-03 | 1.07E-02 |
| Brain Amygdala                        | 15  | RAB8B           | 63520824  | rs12908891 | 64236441  | A  | G  | 0.52 | 1.39E-06 | 1.98E-02 | 3.51E-02 |
| Brain Anterior cingulate cortex BA24  | 15  | HERC1           | 64013479  | rs12908891 | 64236441  | A  | G  | 0.52 | 1.39E-06 | 7.02E-05 | 1.94E-03 |
| Brain Anterior cingulate cortex BA24  | 15  | DAPK2           | 64281733  | rs12908891 | 64236441  | A  | G  | 0.52 | 1.39E-06 | 1.40E-02 | 2.77E-02 |
| Brain Cerebellar Hemisphere           | 15  | ANKDD1A         | 65227571  | rs12908891 | 64236441  | A  | G  | 0.52 | 1.39E-06 | 3.20E-02 | 4.90E-02 |
| Brain Cerebellum                      | 15  | RP11-244F12.3   | 63339909  | rs12908891 | 64236441  | A  | G  | 0.52 | 1.39E-06 | 4.94E-02 | 6.77E-02 |
| Brain Cerebellum                      | 15  | LACTB           | 63424129  | rs12908891 | 64236441  | A  | G  | 0.52 | 1.39E-06 | 2.10E-02 | 3.64E-02 |
| Brain Cerebellum                      | 15  | CA12            | 63643968  | rs12908891 | 64236441  | A  | G  | 0.52 | 1.39E-06 | 2.44E-02 | 4.04E-02 |
| Brain Cerebellum                      | 15  | USP3-AS1        | 63864970  | rs12908891 | 64236441  | A  | G  | 0.52 | 1.39E-06 | 4.85E-02 | 6.69E-02 |
| Brain Cerebellum                      | 15  | DAPK2           | 64281733  | rs12908891 | 64236441  | A  | G  | 0.52 | 1.39E-06 | 1.95E-03 | 8.63E-03 |
| Brain Frontal Cortex BA9              | 15  | AC100830.3      | 65002624  | rs12908891 | 64236441  | A  | G  | 0.52 | 1.39E-06 | 1.67E-02 | 3.12E-02 |
| Brain Frontal Cortex BA9              | 15  | PLEKHO2         | 65147147  | rs12908891 | 64236441  | A  | G  | 0.52 | 1.39E-06 | 4.73E-02 | 6.56E-02 |
| Brain Hippocampus                     | 15  | FBXL22          | 63892089  | rs12908891 | 64236441  | A  | G  | 0.52 | 1.39E-06 | 4.97E-02 | 6.81E-02 |
| Brain Hippocampus                     | 15  | AC100830.4      | 64987516  | rs12908891 | 64236441  | A  | G  | 0.52 | 1.39E-06 | 4.44E-02 | 6.25E-02 |
| Brain Nucleus accumbens basal ganglia | 15  | RP11-244F12.3   | 63339909  | rs12908891 | 64236441  | A  | G  | 0.52 | 1.39E-06 | 3.96E-02 | 5.74E-02 |
| Brain Nucleus accumbens basal ganglia | 15  | USP3-AS1        | 63864970  | rs12908891 | 64236441  | A  | G  | 0.52 | 1.39E-06 | 7.63E-03 | 1.88E-02 |
| Brain Nucleus accumbens basal ganglia | 15  | SNX22           | 64446798  | rs12908891 | 64236441  | A  | G  | 0.52 | 1.39E-06 | 3.18E-02 | 4.89E-02 |
| Brain Putamen basal ganglia           | 15  | TPM1            | 63349472  | rs12908891 | 64236441  | A  | G  | 0.52 | 1.39E-06 | 3.55E-02 | 5.29E-02 |
| Brain Putamen basal ganglia           | 15  | SNX22           | 64446798  | rs12908891 | 64236441  | A  | G  | 0.52 | 1.39E-06 | 4.62E-03 | 1.39E-02 |
| Brain Putamen basal ganglia           | 15  | TRIP4           | 64713724  | rs12908891 | 64236441  | A  | G  | 0.52 | 1.39E-06 | 2.45E-02 | 4.06E-02 |
| Brain Putamen basal ganglia           | 15  | RBPMS2          | 65049938  | rs12908891 | 64236441  | A  | G  | 0.52 | 1.39E-06 | 4.15E-02 | 5.94E-02 |
| Brain Spinal cord cervical c-1        | 15  | RAB8B           | 63520824  | rs12908891 | 64236441  | A  | G  | 0.52 | 1.39E-06 | 4.81E-02 | 6.64E-02 |
| Brain Spinal cord cervical c-1        | 15  | FBXL22          | 63892089  | rs12908891 | 64236441  | A  | G  | 0.52 | 1.39E-06 | 1.29E-02 | 2.63E-02 |
| Brain Spinal cord cervical c-1        | 15  | TRIP4           | 64713724  | rs12908891 | 64236441  | A  | G  | 0.52 | 1.39E-06 | 4.60E-02 | 6.42E-02 |
| Brain Substantia nigra                | 15  | FBXL22          | 63892089  | rs12908891 | 64236441  | A  | G  | 0.52 | 1.39E-06 | 2.05E-02 | 3.58E-02 |
| Whole Blood                           | 15  | TPM1            | 63349472  | rs12908891 | 64236441  | A  | G  | 0.52 | 1.39E-06 | 2.66E-02 | 4.30E-02 |
| Whole Blood                           | 15  | KIAA0101        | 64668539  | rs12908891 | 64236441  | A  | G  | 0.52 | 1.39E-06 | 1.86E-02 | 3.35E-02 |
| Brain Amygdala                        | 4   | KIAA1430        | 186105738 | rs7377304  | 187129780 | G  | T  | 0.45 | 2.46E-06 | 2.21E-02 | 3.88E-02 |
| Brain Anterior cingulate cortex BA24  | 4   | SORBS2          | 186692202 | rs7377304  | 187129780 | G  | T  | 0.45 | 2.46E-06 | 3.88E-02 | 5.77E-02 |
| Brain Anterior cingulate cortex BA24  | 4   | FAM149A         | 187059697 | rs7377304  | 187129780 | G  | T  | 0.45 | 2.46E-06 | 1.35E-02 | 2.81E-02 |
| Brain Anterior cingulate cortex BA24  | 4   | F11             | 187198967 | rs7377304  | 187129780 | G  | T  | 0.45 | 2.46E-06 | 8.33E-03 | 2.08E-02 |
| Brain Anterior cingulate cortex BA24  | 4   | MTNR1A          | 187465765 | rs7377304  | 187129780 | G  | T  | 0.45 | 2.46E-06 | 1.51E-02 | 3.02E-02 |
| Brain Caudate basal ganglia           | 4   | CYP4V2          | 187123642 | rs7377304  | 187129780 | G  | T  | 0.45 | 2.46E-06 | 1.48E-02 | 2.97E-02 |
| Brain Caudate basal ganglia           | 4   | F11             | 187198967 | rs7377304  | 187129780 | G  | T  | 0.45 | 2.46E-06 | 2.71E-02 | 4.47E-02 |
| Brain Cerebellar Hemisphere           | 4   | C4orf47         | 186359187 | rs7377304  | 187129780 | G  | T  | 0.45 | 2.46E-06 | 2.02E-02 | 3.66E-02 |
| Brain Cerebellum                      | 4   | UFSP2           | 186333916 | rs7377304  | 187129780 | G  | T  | 0.45 | 2.46E-06 | 4.55E-02 | 6.48E-02 |
| Brain Cerebellum                      | 4   | PDLIM3          | 186439808 | rs7377304  | 187129780 | G  | T  | 0.45 | 2.46E-06 | 7.07E-03 | 1.88E-02 |
| Brain Cerebellum                      | 4   | ORAOV1P1        | 187092214 | rs7377304  | 187129780 | G  | T  | 0.45 | 2.46E-06 | 2.97E-02 | 4.77E-02 |
| Brain Cortex                          | 4   | F11             | 187198967 | rs7377304  | 187129780 | G  | T  | 0.45 | 2.46E-06 | 1.10E-05 | 1.19E-03 |
| Brain Frontal Cortex BA9              | 4   | RP11-714G18.1   | 186302025 | rs7377304  | 187129780 | G  | T  | 0.45 | 2.46E-06 | 2.27E-02 | 3.96E-02 |
| Brain Frontal Cortex BA9              | 4   | F11             | 187198967 | rs7377304  | 187129780 | G  | T  | 0.45 | 2.46E-06 | 4.91E-02 | 6.87E-02 |
| Brain Hippocampus                     | 4   | F11             | 187198967 | rs7377304  | 187129780 | G  | T  | 0.45 | 2.46E-06 | 2.85E-04 | 3.80E-03 |
| Brain Nucleus accumbens basal ganglia | 4   | CYP4V2          | 187123642 | rs7377304  | 187129780 | G  | T  | 0.45 | 2.46E-06 | 2.81E-02 | 4.58E-02 |
| Brain Putamen basal ganglia           | 4   | F11             | 187198967 | rs7377304  | 187129780 | G  | T  | 0.45 | 2.46E-06 | 5.04E-03 | 1.55E-02 |
| Brain Putamen basal ganglia           | 4   | FAT1            | 187578406 | rs7377304  | 187129780 | G  | T  | 0.45 | 2.46E-06 | 1.06E-02 | 2.40E-02 |
| Brain Spinal cord cervical c-1        | 4   | TLR3            | 186999764 | rs7377304  | 187129780 | G  | T  | 0.45 | 2.46E-06 | 4.35E-02 | 6.27E-02 |
| Brain Substantia nigra                | 4   | F11             | 187198967 | rs7377304  | 187129780 | G  | T  | 0.45 | 2.46E-06 | 1.19E-02 | 2.59E-02 |
| Whole Blood                           | 4   | UFSP2           | 186333916 | rs7377304  | 187129780 | G  | T  | 0.45 | 2.46E-06 | 3.65E-04 | 4.22E-03 |
| Brain Amygdala                        | 21  | AP001053.11     | 45229043  | rs55708341 | 45627581  | T  | A  | 0.2  | 2.51E-06 | 4.54E-02 | 7.10E-02 |
| Brain Anterior cingulate cortex BA24  | 21  | CSTB            | 45194359  | rs55708341 | 45627581  | T  | A  | 0.2  | 2.51E-06 | 3.97E-02 | 6.49E-02 |
| Brain Anterior cingulate cortex BA24  | 21  | RRP1            | 45217284  | rs55708341 | 45627581  | T  | A  | 0.2  | 2.51E-06 | 8.64E-03 | 2.61E-02 |
| Brain Caudate basal ganglia           | 21  | TRAPPC10        | 45479316  | rs55708341 | 45627581  | T  | A  | 0.2  | 2.51E-06 | 2.90E-02 | 5.29E-02 |
| Brain Caudate basal ganglia           | 21  | UBE2G2          | 46205444  | rs55708341 | 45627581  | T  | A  | 0.2  | 2.51E-06 | 3.66E-02 | 6.15E-02 |
| Brain Cerebellar Hemisphere           | 21  | RRP1B           | 45097693  | rs55708341 | 45627581  | T  | A  | 0.2  | 2.51E-06 | 2.72E-02 | 5.08E-02 |
| Brain Cerebellar Hemisphere           | 21  | CSTB            | 45194359  | rs55708341 | 45627581  | T  | A  | 0.2  | 2.51E-06 | 4.25E-02 | 6.79E-02 |
| Brain Cerebellar Hemisphere           | 21  | AP001055.6      | 45579291  | rs55708341 | 45627581  | T  | A  | 0.2  | 2.51E-06 | 1.11E-02 | 2.99E-02 |
| Brain Cerebellar Hemisphere           | 21  | AP001058.3      | 45626845  | rs55708341 | 45627581  | T  | A  | 0.2  | 2.51E-06 | 3.48E-02 | 5.95E-02 |
| Brain Cerebellum                      | 21  | C21orf67        | 46356278  | rs55708341 | 45627581  | T  | A  | 0.2  | 2.51E-06 | 2.07E-02 | 4.29E-02 |
| Brain Cortex                          | 21  | LL21NC02-1C16.1 | 46349810  | rs55708341 | 45627581  | T  | A  | 0.2  | 2.51E-06 | 7.94E-03 | 2.50E-02 |
| Brain Frontal Cortex BA9              | 21  | LINC00313       | 44890694  | rs55708341 | 45627581  | T  | A  | 0.2  | 2.51E-06 | 4.70E-02 | 7.27E-02 |
| Brain Frontal Cortex BA9              | 21  | HSF2BP          | 45014223  | rs55708341 | 45627581  | T  | A  | 0.2  | 2.51E-06 | 4.84E-02 | 7.42E-02 |

|                                       |    |                 |           |             |           |   |   |      |          |          |          |
|---------------------------------------|----|-----------------|-----------|-------------|-----------|---|---|------|----------|----------|----------|
| Brain Frontal Cortex BA9              | 21 | CSTB            | 45194359  | rs55708341  | 45627581  | T | A | 0.2  | 2.51E-06 | 5.21E-03 | 2.02E-02 |
| Brain Frontal Cortex BA9              | 21 | AP001058.3      | 45626845  | rs55708341  | 45627581  | T | A | 0.2  | 2.51E-06 | 6.86E-04 | 8.38E-03 |
| Brain Hippocampus                     | 21 | LL21NC02-1C16.2 | 46356543  | rs55708341  | 45627581  | T | A | 0.2  | 2.51E-06 | 2.38E-02 | 4.67E-02 |
| Brain Hypothalamus                    | 21 | HSF2BP          | 45014223  | rs55708341  | 45627581  | T | A | 0.2  | 2.51E-06 | 3.71E-02 | 6.20E-02 |
| Brain Hypothalamus                    | 21 | CSTB            | 45194359  | rs55708341  | 45627581  | T | A | 0.2  | 2.51E-06 | 1.83E-02 | 3.98E-02 |
| Brain Hypothalamus                    | 21 | AP001065.7      | 45891105  | rs55708341  | 45627581  | T | A | 0.2  | 2.51E-06 | 3.73E-02 | 6.23E-02 |
| Brain Nucleus accumbens basal ganglia | 21 | AP001058.3      | 45626845  | rs55708341  | 45627581  | T | A | 0.2  | 2.51E-06 | 4.65E-02 | 7.22E-02 |
| Brain Nucleus accumbens basal ganglia | 21 | ICOSLG          | 45651861  | rs55708341  | 45627581  | T | A | 0.2  | 2.51E-06 | 4.79E-02 | 7.37E-02 |
| Brain Nucleus accumbens basal ganglia | 21 | LRRC3           | 45877054  | rs55708341  | 45627581  | T | A | 0.2  | 2.51E-06 | 3.77E-02 | 6.27E-02 |
| Brain Nucleus accumbens basal ganglia | 21 | C21orf90        | 45941467  | rs55708341  | 45627581  | T | A | 0.2  | 2.51E-06 | 1.11E-02 | 2.99E-02 |
| Brain Putamen basal ganglia           | 21 | SUMO3           | 46232113  | rs55708341  | 45627581  | T | A | 0.2  | 2.51E-06 | 3.26E-02 | 5.71E-02 |
| Brain Substantia nigra                | 21 | AP001056.1      | 45595854  | rs55708341  | 45627581  | T | A | 0.2  | 2.51E-06 | 4.07E-02 | 6.60E-02 |
| Whole Blood                           | 21 | RRP1B           | 45097693  | rs55708341  | 45627581  | T | A | 0.2  | 2.51E-06 | 4.30E-02 | 6.84E-02 |
| Brain Amygdala                        | 3  | CADM2           | 85565855  | rs9831119   | 84712077  | C | T | 0.13 | 2.98E-06 | 1.50E-03 | 9.29E-03 |
| Brain Cortex                          | 3  | CADM2           | 85565855  | rs9831119   | 84712077  | C | T | 0.13 | 2.98E-06 | 2.43E-02 | 4.37E-02 |
| Brain Anterior cingulate cortex BA24  | 2  | AC096772.6      | 208686753 | rs6722000   | 209075957 | G | A | 0.21 | 4.96E-06 | 7.00E-03 | 2.15E-02 |
| Brain Caudate basal ganglia           | 2  | CREB1           | 208431337 | rs6722000   | 209075957 | G | A | 0.21 | 4.96E-06 | 2.49E-02 | 4.57E-02 |
| Brain Cerebellum                      | 2  | C2orf80         | 209042432 | rs6722000   | 209075957 | G | A | 0.21 | 4.96E-06 | 6.70E-03 | 2.10E-02 |
| Brain Cerebellum                      | 2  | PIKFYVE         | 209177233 | rs6722000   | 209075957 | G | A | 0.21 | 4.96E-06 | 2.27E-02 | 4.31E-02 |
| Brain Cortex                          | 2  | IDH1-AS1        | 209120438 | rs6722000   | 209075957 | G | A | 0.21 | 4.96E-06 | 4.81E-03 | 1.76E-02 |
| Brain Hippocampus                     | 2  | IDH1-AS1        | 209120438 | rs6722000   | 209075957 | G | A | 0.21 | 4.96E-06 | 1.65E-02 | 3.54E-02 |
| Brain Hypothalamus                    | 2  | PTH2R           | 209471832 | rs6722000   | 209075957 | G | A | 0.21 | 4.96E-06 | 3.53E-02 | 5.77E-02 |
| Brain Substantia nigra                | 2  | CCNYL1          | 208601413 | rs6722000   | 209075957 | G | A | 0.21 | 4.96E-06 | 4.92E-02 | 7.26E-02 |
| Brain Substantia nigra                | 2  | CRYGEP          | 208975096 | rs6722000   | 209075957 | G | A | 0.21 | 4.96E-06 | 4.90E-02 | 7.24E-02 |
| Whole Blood                           | 2  | AC007879.2      | 208076115 | rs6722000   | 209075957 | G | A | 0.21 | 4.96E-06 | 4.39E-02 | 6.70E-02 |
| Whole Blood                           | 2  | PIKFYVE         | 209177233 | rs6722000   | 209075957 | G | A | 0.21 | 4.96E-06 | 1.08E-02 | 2.75E-02 |
| Brain Amygdala                        | 3  | YEATS2-AS1      | 183526253 | rs11923588  | 184459667 | T | C | 0.06 | 5.66E-06 | 7.92E-03 | 2.02E-02 |
| Brain Amygdala                        | 3  | PARL            | 183574934 | rs11923588  | 184459667 | T | C | 0.06 | 5.66E-06 | 1.56E-02 | 3.08E-02 |
| Brain Amygdala                        | 3  | ABCC5           | 183686762 | rs11923588  | 184459667 | T | C | 0.06 | 5.66E-06 | 3.63E-03 | 1.29E-02 |
| Brain Amygdala                        | 3  | CAMK2N2         | 183978312 | rs11923588  | 184459667 | T | C | 0.06 | 5.66E-06 | 2.62E-02 | 4.37E-02 |
| Brain Amygdala                        | 3  | VPS8            | 184650166 | rs11923588  | 184459667 | T | C | 0.06 | 5.66E-06 | 2.94E-02 | 4.74E-02 |
| Brain Anterior cingulate cortex BA24  | 3  | YEATS2-AS1      | 183526253 | rs11923588  | 184459667 | T | C | 0.06 | 5.66E-06 | 1.68E-02 | 3.23E-02 |
| Brain Anterior cingulate cortex BA24  | 3  | ABCC5           | 183686762 | rs11923588  | 184459667 | T | C | 0.06 | 5.66E-06 | 8.10E-03 | 2.05E-02 |
| Brain Anterior cingulate cortex BA24  | 3  | VPS8            | 184650166 | rs11923588  | 184459667 | T | C | 0.06 | 5.66E-06 | 1.96E-02 | 3.59E-02 |
| Brain Caudate basal ganglia           | 3  | YEATS2-AS1      | 183526253 | rs11923588  | 184459667 | T | C | 0.06 | 5.66E-06 | 4.74E-02 | 6.69E-02 |
| Brain Caudate basal ganglia           | 3  | FAM131A         | 184058843 | rs11923588  | 184459667 | T | C | 0.06 | 5.66E-06 | 3.06E-02 | 4.87E-02 |
| Brain Caudate basal ganglia           | 3  | SENP2           | 185325811 | rs11923588  | 184459667 | T | C | 0.06 | 5.66E-06 | 1.91E-02 | 3.53E-02 |
| Brain Cerebellar Hemisphere           | 3  | HSP90AA5P       | 183834413 | rs11923588  | 184459667 | T | C | 0.06 | 5.66E-06 | 2.43E-02 | 4.14E-02 |
| Brain Cerebellar Hemisphere           | 3  | RP11-329B9.5    | 184460839 | rs11923588  | 184459667 | T | C | 0.06 | 5.66E-06 | 1.48E-02 | 2.98E-02 |
| Brain Cerebellum                      | 3  | CAMK2N2         | 183978312 | rs11923588  | 184459667 | T | C | 0.06 | 5.66E-06 | 1.98E-02 | 3.61E-02 |
| Brain Hippocampus                     | 3  | RP11-329B9.4    | 184454300 | rs11923588  | 184459667 | T | C | 0.06 | 5.66E-06 | 3.38E-02 | 5.23E-02 |
| Brain Nucleus accumbens basal ganglia | 3  | AP2M1           | 183897178 | rs11923588  | 184459667 | T | C | 0.06 | 5.66E-06 | 3.05E-02 | 4.86E-02 |
| Brain Putamen basal ganglia           | 3  | RP11-778D9.12   | 183852416 | rs11923588  | 184459667 | T | C | 0.06 | 5.66E-06 | 4.80E-02 | 6.75E-02 |
| Brain Putamen basal ganglia           | 3  | EPHB3           | 184289884 | rs11923588  | 184459667 | T | C | 0.06 | 5.66E-06 | 4.75E-02 | 6.70E-02 |
| Brain Spinal cord cervical c-1        | 3  | CAMK2N2         | 183978312 | rs11923588  | 184459667 | T | C | 0.06 | 5.66E-06 | 4.73E-02 | 6.68E-02 |
| Brain Substantia nigra                | 3  | CAMK2N2         | 183978312 | rs11923588  | 184459667 | T | C | 0.06 | 5.66E-06 | 4.15E-02 | 6.07E-02 |
| Brain Substantia nigra                | 3  | LIPH            | 185247225 | rs11923588  | 184459667 | T | C | 0.06 | 5.66E-06 | 3.57E-02 | 5.43E-02 |
| Whole Blood                           | 3  | CHRD            | 184102739 | rs11923588  | 184459667 | T | C | 0.06 | 5.66E-06 | 3.51E-02 | 5.37E-02 |
| Brain Cerebellum                      | 4  | DTHD1           | 36315311  | rs66837203  | 36897136  | T | C | 0.07 | 6.03E-06 | 1.20E-02 | 2.98E-02 |
| Brain Hypothalamus                    | 4  | ARAP2           | 36097987  | rs66837203  | 36897136  | T | C | 0.07 | 6.03E-06 | 2.68E-03 | 1.36E-02 |
| Brain Putamen basal ganglia           | 4  | ARAP2           | 36097987  | rs66837203  | 36897136  | T | C | 0.07 | 6.03E-06 | 4.88E-02 | 7.29E-02 |
| Brain Putamen basal ganglia           | 4  | RP11-431M7.3    | 36260790  | rs66837203  | 36897136  | T | C | 0.07 | 6.03E-06 | 1.57E-02 | 3.49E-02 |
| Brain Substantia nigra                | 4  | RP11-431M7.3    | 36260790  | rs66837203  | 36897136  | T | C | 0.07 | 6.03E-06 | 2.53E-02 | 4.69E-02 |
| Brain Cerebellar Hemisphere           | 4  | RP11-46J23.1    | 71569836  | rs200028958 | 70923661  | A | G | 0.1  | 6.25E-06 | 2.90E-02 | 5.35E-02 |
| Brain Hypothalamus                    | 4  | UTP3            | 71555231  | rs200028958 | 70923661  | A | G | 0.1  | 6.25E-06 | 1.41E-02 | 3.49E-02 |
| Brain Hypothalamus                    | 4  | RUFY3           | 71621775  | rs200028958 | 70923661  | A | G | 0.1  | 6.25E-06 | 2.78E-02 | 5.21E-02 |
| Brain Hypothalamus                    | 4  | DCK             | 71877443  | rs200028958 | 70923661  | A | G | 0.1  | 6.25E-06 | 1.25E-02 | 3.26E-02 |
| Whole Blood                           | 4  | GRSF1           | 71693580  | rs200028958 | 70923661  | A | G | 0.1  | 6.25E-06 | 6.40E-03 | 2.29E-02 |
| Brain Amygdala                        | 12 | ERBB3           | 56485465  | rs4526799   | 57280586  | T | C | 0.34 | 7.26E-06 | 3.43E-02 | 6.91E-02 |
| Brain Amygdala                        | 12 | ATP5B           | 57035878  | rs4526799   | 57280586  | T | C | 0.34 | 7.26E-06 | 1.95E-02 | 5.10E-02 |
| Brain Amygdala                        | 12 | PRIM1           | 57135785  | rs4526799   | 57280586  | T | C | 0.34 | 7.26E-06 | 4.71E-03 | 2.70E-02 |
| Brain Amygdala                        | 12 | AC025165.8      | 58008874  | rs4526799   | 57280586  | T | C | 0.34 | 7.26E-06 | 2.87E-02 | 6.25E-02 |
| Brain Amygdala                        | 12 | TSPAN31         | 58138756  | rs4526799   | 57280586  | T | C | 0.34 | 7.26E-06 | 4.57E-02 | 8.16E-02 |
| Brain Amygdala                        | 12 | AVIL            | 58201929  | rs4526799   | 57280586  | T | C | 0.34 | 7.26E-06 | 2.48E-03 | 2.13E-02 |
| Brain Anterior cingulate cortex BA24  | 12 | MYL6            | 56554355  | rs4526799   | 57280586  | T | C | 0.34 | 7.26E-06 | 2.10E-02 | 5.30E-02 |
| Brain Anterior cingulate cortex BA24  | 12 | CNPY2           | 56706816  | rs4526799   | 57280586  | T | C | 0.34 | 7.26E-06 | 4.40E-02 | 7.98E-02 |
| Brain Anterior cingulate cortex BA24  | 12 | BAZZA           | 57009990  | rs4526799   | 57280586  | T | C | 0.34 | 7.26E-06 | 2.80E-02 | 6.17E-02 |
| Brain Anterior cingulate cortex BA24  | 12 | TMEM194A        | 57465636  | rs4526799   | 57280586  | T | C | 0.34 | 7.26E-06 | 9.25E-04 | 1.54E-02 |
| Brain Anterior cingulate cortex BA24  | 12 | INHBE           | 57849584  | rs4526799   | 57280586  | T | C | 0.34 | 7.26E-06 | 1.93E-03 | 1.95E-02 |
| Brain Anterior cingulate cortex BA24  | 12 | RP11-571M6.17   | 58197909  | rs4526799   | 57280586  | T | C | 0.34 | 7.26E-06 | 4.87E-02 | 8.48E-02 |
| Brain Anterior cingulate cortex BA24  | 12 | AVIL            | 58201929  | rs4526799   | 57280586  | T | C | 0.34 | 7.26E-06 | 1.68E-02 | 4.73E-02 |
| Brain Caudate basal ganglia           | 12 | PA2G4           | 56502897  | rs4526799   | 57280586  | T | C | 0.34 | 7.26E-06 | 1.56E-02 | 4.56E-02 |

|                                       |    |                |          |            |          |   |   |      |          |          |          |
|---------------------------------------|----|----------------|----------|------------|----------|---|---|------|----------|----------|----------|
| Brain Caudate basal ganglia           | 12 | COQ10A         | 56662696 | rs4526799  | 57280586 | T | C | 0.34 | 7.26E-06 | 2.82E-02 | 6.19E-02 |
| Brain Caudate basal ganglia           | 12 | IL23A          | 56733428 | rs4526799  | 57280586 | T | C | 0.34 | 7.26E-06 | 1.34E-02 | 4.24E-02 |
| Brain Caudate basal ganglia           | 12 | RP11-74M13.4   | 57242410 | rs4526799  | 57280586 | T | C | 0.34 | 7.26E-06 | 1.97E-02 | 5.12E-02 |
| Brain Caudate basal ganglia           | 12 | MYO1A          | 57433641 | rs4526799  | 57280586 | T | C | 0.34 | 7.26E-06 | 1.86E-02 | 4.97E-02 |
| Brain Cerebellar Hemisphere           | 12 | PMEL           | 56357495 | rs4526799  | 57280586 | T | C | 0.34 | 7.26E-06 | 9.90E-03 | 3.69E-02 |
| Brain Cerebellar Hemisphere           | 12 | RP11-603J24.7  | 56374517 | rs4526799  | 57280586 | T | C | 0.34 | 7.26E-06 | 9.33E-03 | 3.59E-02 |
| Brain Cerebellar Hemisphere           | 12 | MYL6           | 56554355 | rs4526799  | 57280586 | T | C | 0.34 | 7.26E-06 | 1.40E-02 | 4.33E-02 |
| Brain Cerebellar Hemisphere           | 12 | METTL21B       | 58170856 | rs4526799  | 57280586 | T | C | 0.34 | 7.26E-06 | 4.24E-02 | 7.81E-02 |
| Brain Cerebellum                      | 12 | RPS26          | 56436876 | rs4526799  | 57280586 | T | C | 0.34 | 7.26E-06 | 2.88E-02 | 6.27E-02 |
| Brain Cerebellum                      | 12 | CS             | 56679829 | rs4526799  | 57280586 | T | C | 0.34 | 7.26E-06 | 3.16E-02 | 6.59E-02 |
| Brain Cerebellum                      | 12 | MIP            | 56853054 | rs4526799  | 57280586 | T | C | 0.34 | 7.26E-06 | 4.42E-02 | 8.00E-02 |
| Brain Cerebellum                      | 12 | PTGES3         | 57069643 | rs4526799  | 57280586 | T | C | 0.34 | 7.26E-06 | 3.11E-02 | 6.53E-02 |
| Brain Cerebellum                      | 12 | RDH16          | 57349188 | rs4526799  | 57280586 | T | C | 0.34 | 7.26E-06 | 2.13E-02 | 5.34E-02 |
| Brain Cortex                          | 12 | WIBG           | 56310770 | rs4526799  | 57280586 | T | C | 0.34 | 7.26E-06 | 3.72E-02 | 7.24E-02 |
| Brain Cortex                          | 12 | PMEL           | 56357495 | rs4526799  | 57280586 | T | C | 0.34 | 7.26E-06 | 2.36E-03 | 2.09E-02 |
| Brain Cortex                          | 12 | STAC3          | 57641106 | rs4526799  | 57280586 | T | C | 0.34 | 7.26E-06 | 4.54E-02 | 8.12E-02 |
| Brain Frontal Cortex BA9              | 12 | IKZF4          | 56416831 | rs4526799  | 57280586 | T | C | 0.34 | 7.26E-06 | 2.60E-02 | 5.92E-02 |
| Brain Frontal Cortex BA9              | 12 | COQ10A         | 56662696 | rs4526799  | 57280586 | T | C | 0.34 | 7.26E-06 | 4.08E-02 | 7.63E-02 |
| Brain Frontal Cortex BA9              | 12 | RP11-977G19.11 | 56701259 | rs4526799  | 57280586 | T | C | 0.34 | 7.26E-06 | 1.96E-02 | 5.11E-02 |
| Brain Hippocampus                     | 12 | RAB5B          | 56378093 | rs4526799  | 57280586 | T | C | 0.34 | 7.26E-06 | 2.48E-02 | 5.78E-02 |
| Brain Hippocampus                     | 12 | RNF41          | 56607001 | rs4526799  | 57280586 | T | C | 0.34 | 7.26E-06 | 2.32E-02 | 5.58E-02 |
| Brain Hippocampus                     | 12 | ANKRD52        | 56641903 | rs4526799  | 57280586 | T | C | 0.34 | 7.26E-06 | 3.06E-02 | 6.47E-02 |
| Brain Hippocampus                     | 12 | ZBTB39         | 57396424 | rs4526799  | 57280586 | T | C | 0.34 | 7.26E-06 | 4.04E-02 | 7.58E-02 |
| Brain Hippocampus                     | 12 | METTL1         | 58164318 | rs4526799  | 57280586 | T | C | 0.34 | 7.26E-06 | 8.61E-03 | 3.47E-02 |
| Brain Hypothalamus                    | 12 | PTGES3         | 57069643 | rs4526799  | 57280586 | T | C | 0.34 | 7.26E-06 | 1.05E-02 | 3.79E-02 |
| Brain Nucleus accumbens basal ganglia | 12 | RNF41          | 56607001 | rs4526799  | 57280586 | T | C | 0.34 | 7.26E-06 | 4.91E-02 | 8.53E-02 |
| Brain Nucleus accumbens basal ganglia | 12 | BAZ2A          | 57009990 | rs4526799  | 57280586 | T | C | 0.34 | 7.26E-06 | 3.20E-02 | 6.64E-02 |
| Brain Putamen basal ganglia           | 12 | WIBG           | 56310770 | rs4526799  | 57280586 | T | C | 0.34 | 7.26E-06 | 3.45E-02 | 6.93E-02 |
| Brain Putamen basal ganglia           | 12 | CDK2           | 56363560 | rs4526799  | 57280586 | T | C | 0.34 | 7.26E-06 | 1.90E-02 | 5.03E-02 |
| Brain Putamen basal ganglia           | 12 | RPS26          | 56436876 | rs4526799  | 57280586 | T | C | 0.34 | 7.26E-06 | 1.38E-02 | 4.30E-02 |
| Brain Putamen basal ganglia           | 12 | MYL6B          | 56548905 | rs4526799  | 57280586 | T | C | 0.34 | 7.26E-06 | 1.59E-02 | 4.60E-02 |
| Brain Putamen basal ganglia           | 12 | NABP2          | 56619718 | rs4526799  | 57280586 | T | C | 0.34 | 7.26E-06 | 3.66E-02 | 7.16E-02 |
| Brain Putamen basal ganglia           | 12 | CS             | 56679829 | rs4526799  | 57280586 | T | C | 0.34 | 7.26E-06 | 3.12E-02 | 6.55E-02 |
| Brain Putamen basal ganglia           | 12 | RP11-977G19.11 | 56701259 | rs4526799  | 57280586 | T | C | 0.34 | 7.26E-06 | 3.55E-02 | 7.04E-02 |
| Brain Putamen basal ganglia           | 12 | IL23A          | 56733428 | rs4526799  | 57280586 | T | C | 0.34 | 7.26E-06 | 1.97E-02 | 5.13E-02 |
| Brain Putamen basal ganglia           | 12 | NAB2           | 57485933 | rs4526799  | 57280586 | T | C | 0.34 | 7.26E-06 | 7.23E-03 | 3.22E-02 |
| Brain Putamen basal ganglia           | 12 | INHBE          | 57849584 | rs4526799  | 57280586 | T | C | 0.34 | 7.26E-06 | 3.79E-02 | 7.31E-02 |
| Brain Putamen basal ganglia           | 12 | AVIL           | 58201929 | rs4526799  | 57280586 | T | C | 0.34 | 7.26E-06 | 2.01E-02 | 5.18E-02 |
| Brain Spinal cord cervical c-1        | 12 | ESYT1          | 56530147 | rs4526799  | 57280586 | T | C | 0.34 | 7.26E-06 | 4.85E-02 | 8.46E-02 |
| Brain Spinal cord cervical c-1        | 12 | TAC3           | 57413225 | rs4526799  | 57280586 | T | C | 0.34 | 7.26E-06 | 3.04E-02 | 6.46E-02 |
| Brain Substantia nigra                | 12 | RP11-603J24.7  | 56374517 | rs4526799  | 57280586 | T | C | 0.34 | 7.26E-06 | 3.56E-02 | 7.06E-02 |
| Brain Substantia nigra                | 12 | MYL6           | 56554355 | rs4526799  | 57280586 | T | C | 0.34 | 7.26E-06 | 3.69E-02 | 7.20E-02 |
| Brain Substantia nigra                | 12 | RP11-153M3.1   | 56905636 | rs4526799  | 57280586 | T | C | 0.34 | 7.26E-06 | 4.31E-02 | 7.88E-02 |
| Brain Substantia nigra                | 12 | CYP27B1        | 58158578 | rs4526799  | 57280586 | T | C | 0.34 | 7.26E-06 | 4.56E-02 | 8.15E-02 |
| Whole Blood                           | 12 | RP11-977G19.11 | 56701259 | rs4526799  | 57280586 | T | C | 0.34 | 7.26E-06 | 1.21E-02 | 4.04E-02 |
| Whole Blood                           | 12 | STAT2          | 56744645 | rs4526799  | 57280586 | T | C | 0.34 | 7.26E-06 | 3.25E-02 | 6.69E-02 |
| Whole Blood                           | 12 | GLS2           | 56873481 | rs4526799  | 57280586 | T | C | 0.34 | 7.26E-06 | 1.06E-02 | 3.80E-02 |
| Whole Blood                           | 12 | NAB2           | 57485933 | rs4526799  | 57280586 | T | C | 0.34 | 7.26E-06 | 7.08E-03 | 3.19E-02 |
| Whole Blood                           | 12 | KIF5A          | 57962098 | rs4526799  | 57280586 | T | C | 0.34 | 7.26E-06 | 5.09E-03 | 2.79E-02 |
| Whole Blood                           | 12 | RP11-571M6.8   | 58118261 | rs4526799  | 57280586 | T | C | 0.34 | 7.26E-06 | 4.56E-02 | 8.15E-02 |
| Whole Blood                           | 12 | AGAP2          | 58127694 | rs4526799  | 57280586 | T | C | 0.34 | 7.26E-06 | 1.48E-02 | 4.45E-02 |
| Brain Amygdala                        | 1  | MED28P8        | 82023161 | rs17105538 | 81315043 | G | A | 0.15 | 7.66E-06 | 2.23E-02 | 4.19E-02 |
| Brain Hippocampus                     | 1  | LPHN2          | 82114982 | rs17105538 | 81315043 | G | A | 0.15 | 7.66E-06 | 1.48E-02 | 3.23E-02 |
| Brain Substantia nigra                | 1  | LPHN2          | 82114982 | rs17105538 | 81315043 | G | A | 0.15 | 7.66E-06 | 3.79E-02 | 5.98E-02 |
| Brain Amygdala                        | 2  | RNASEH1        | 3599232  | rs62121100 | 3093952  | G | T | 0.18 | 8.44E-06 | 1.76E-02 | 4.34E-02 |
| Brain Cerebellar Hemisphere           | 2  | RNASEH1        | 3599232  | rs62121100 | 3093952  | G | T | 0.18 | 8.44E-06 | 4.98E-02 | 8.07E-02 |
| Brain Cerebellar Hemisphere           | 2  | ALLC           | 3727979  | rs62121100 | 3093952  | G | T | 0.18 | 8.44E-06 | 4.90E-02 | 7.98E-02 |
| Brain Cerebellum                      | 2  | RP11-1293J14.1 | 3500929  | rs62121100 | 3093952  | G | T | 0.18 | 8.44E-06 | 8.66E-03 | 3.03E-02 |
| Brain Cortex                          | 2  | TSSC1          | 3287174  | rs62121100 | 3093952  | G | T | 0.18 | 8.44E-06 | 3.99E-02 | 7.00E-02 |
| Brain Cortex                          | 2  | RPS7           | 3625652  | rs62121100 | 3093952  | G | T | 0.18 | 8.44E-06 | 7.25E-03 | 2.78E-02 |
| Brain Frontal Cortex BA9              | 2  | TRAPPC12       | 3436155  | rs62121100 | 3093952  | G | T | 0.18 | 8.44E-06 | 2.53E-02 | 5.32E-02 |
| Brain Hippocampus                     | 2  | MYT1L          | 2063958  | rs62121100 | 3093952  | G | T | 0.18 | 8.44E-06 | 3.86E-02 | 6.86E-02 |
| Brain Hippocampus                     | 2  | RP11-1293J14.1 | 3500929  | rs62121100 | 3093952  | G | T | 0.18 | 8.44E-06 | 1.11E-02 | 3.42E-02 |
| Brain Nucleus accumbens basal ganglia | 2  | TSSC1-IT1      | 3303674  | rs62121100 | 3093952  | G | T | 0.18 | 8.44E-06 | 1.98E-02 | 4.64E-02 |
| Brain Nucleus accumbens basal ganglia | 2  | RP11-1293J14.1 | 3500929  | rs62121100 | 3093952  | G | T | 0.18 | 8.44E-06 | 4.22E-02 | 7.26E-02 |
| Brain Nucleus accumbens basal ganglia | 2  | AC142528.1     | 3525007  | rs62121100 | 3093952  | G | T | 0.18 | 8.44E-06 | 3.56E-02 | 6.53E-02 |
| Brain Spinal cord cervical c-1        | 2  | AC142528.1     | 3525007  | rs62121100 | 3093952  | G | T | 0.18 | 8.44E-06 | 3.75E-02 | 6.74E-02 |
| Brain Substantia nigra                | 2  | TMSB4XP2       | 3665242  | rs62121100 | 3093952  | G | T | 0.18 | 8.44E-06 | 2.51E-02 | 5.30E-02 |

|                                |   |                      |          |           |          |   |   |      |          |          |          |
|--------------------------------|---|----------------------|----------|-----------|----------|---|---|------|----------|----------|----------|
| Brain_Amygdala                 | 2 | <i>NOL10</i>         | 10770496 | rs1809136 | 11152180 | C | G | 0.93 | 9.99E-06 | 1.71E-02 | 3.85E-02 |
| Brain_Amygdala                 | 2 | <i>RP11-791G15.2</i> | 10909092 | rs1809136 | 11152180 | C | G | 0.93 | 9.99E-06 | 2.43E-02 | 4.75E-02 |
| Brain_Amygdala                 | 2 | <i>PDIA6</i>         | 10952755 | rs1809136 | 11152180 | C | G | 0.93 | 9.99E-06 | 4.29E-02 | 6.86E-02 |
| Brain_Amygdala                 | 2 | <i>E2F6</i>          | 11595399 | rs1809136 | 11152180 | C | G | 0.93 | 9.99E-06 | 6.29E-04 | 8.21E-03 |
| Brain_Amygdala                 | 2 | <i>GREB1</i>         | 11728578 | rs1809136 | 11152180 | C | G | 0.93 | 9.99E-06 | 1.31E-02 | 3.31E-02 |
| Brain_Caudate_basal_ganglia    | 2 | <i>RN7SL832P</i>     | 10831347 | rs1809136 | 11152180 | C | G | 0.93 | 9.99E-06 | 1.66E-02 | 3.78E-02 |
| Brain_Cerebellar_Hemisphere    | 2 | <i>RP11-254F7.2</i>  | 10180004 | rs1809136 | 11152180 | C | G | 0.93 | 9.99E-06 | 3.36E-03 | 1.65E-02 |
| Brain_Cerebellar_Hemisphere    | 2 | <i>C2orf50</i>       | 11280047 | rs1809136 | 11152180 | C | G | 0.93 | 9.99E-06 | 1.71E-02 | 3.85E-02 |
| Brain_Cortex                   | 2 | <i>AC007249.3</i>    | 10594061 | rs1809136 | 11152180 | C | G | 0.93 | 9.99E-06 | 3.75E-02 | 6.27E-02 |
| Brain_Cortex                   | 2 | <i>ROCK2</i>         | 11404171 | rs1809136 | 11152180 | C | G | 0.93 | 9.99E-06 | 8.31E-03 | 2.58E-02 |
| Brain_Frontal_Cortex_BA9       | 2 | <i>ATP6V1C2</i>      | 10893505 | rs1809136 | 11152180 | C | G | 0.93 | 9.99E-06 | 1.64E-02 | 3.75E-02 |
| Brain_Hippocampus              | 2 | <i>CYS1</i>          | 10208989 | rs1809136 | 11152180 | C | G | 0.93 | 9.99E-06 | 2.82E-02 | 5.21E-02 |
| Brain_Hippocampus              | 2 | <i>ROCK2</i>         | 11404171 | rs1809136 | 11152180 | C | G | 0.93 | 9.99E-06 | 3.30E-02 | 5.77E-02 |
| Brain_Hippocampus              | 2 | <i>NTSR2</i>         | 11804297 | rs1809136 | 11152180 | C | G | 0.93 | 9.99E-06 | 2.92E-03 | 1.54E-02 |
| Brain_Hypothalamus             | 2 | <i>ATP6V1C2</i>      | 10893505 | rs1809136 | 11152180 | C | G | 0.93 | 9.99E-06 | 4.93E-02 | 7.54E-02 |
| Brain_Putamen_basal_ganglia    | 2 | <i>KCNF1</i>         | 11053206 | rs1809136 | 11152180 | C | G | 0.93 | 9.99E-06 | 2.97E-02 | 5.39E-02 |
| Brain_Putamen_basal_ganglia    | 2 | <i>NTSR2</i>         | 11804297 | rs1809136 | 11152180 | C | G | 0.93 | 9.99E-06 | 1.50E-02 | 3.56E-02 |
| Brain_Spinal_cord_cervical_c-1 | 2 | <i>RRM2</i>          | 10267000 | rs1809136 | 11152180 | C | G | 0.93 | 9.99E-06 | 2.32E-02 | 4.62E-02 |
| Brain_Substantia_nigra         | 2 | <i>ATP6V1C2</i>      | 10893505 | rs1809136 | 11152180 | C | G | 0.93 | 9.99E-06 | 2.13E-02 | 4.38E-02 |
| Whole_Blood                    | 2 | <i>RP11-245G13.2</i> | 11021819 | rs1809136 | 11152180 | C | G | 0.93 | 9.99E-06 | 5.78E-03 | 2.14E-02 |

## Supplementary Figures

**Figure S1.** Forest plots of betas (i.e., effect sizes) and 95% confidence interval for the association of the *APOE*/rs429358 SNP with PiB-PET

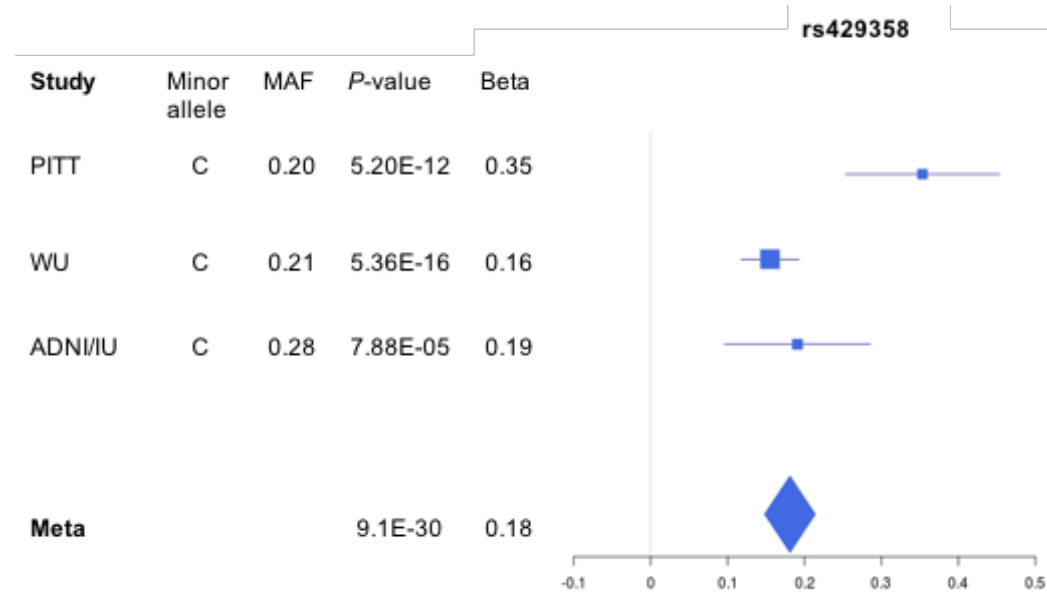



**Figure S2.** Regional plots of 15 non-*APOE* loci listed as S2a to S2o and they correspond to loci listed in Table 2.

**Figure S2.1**

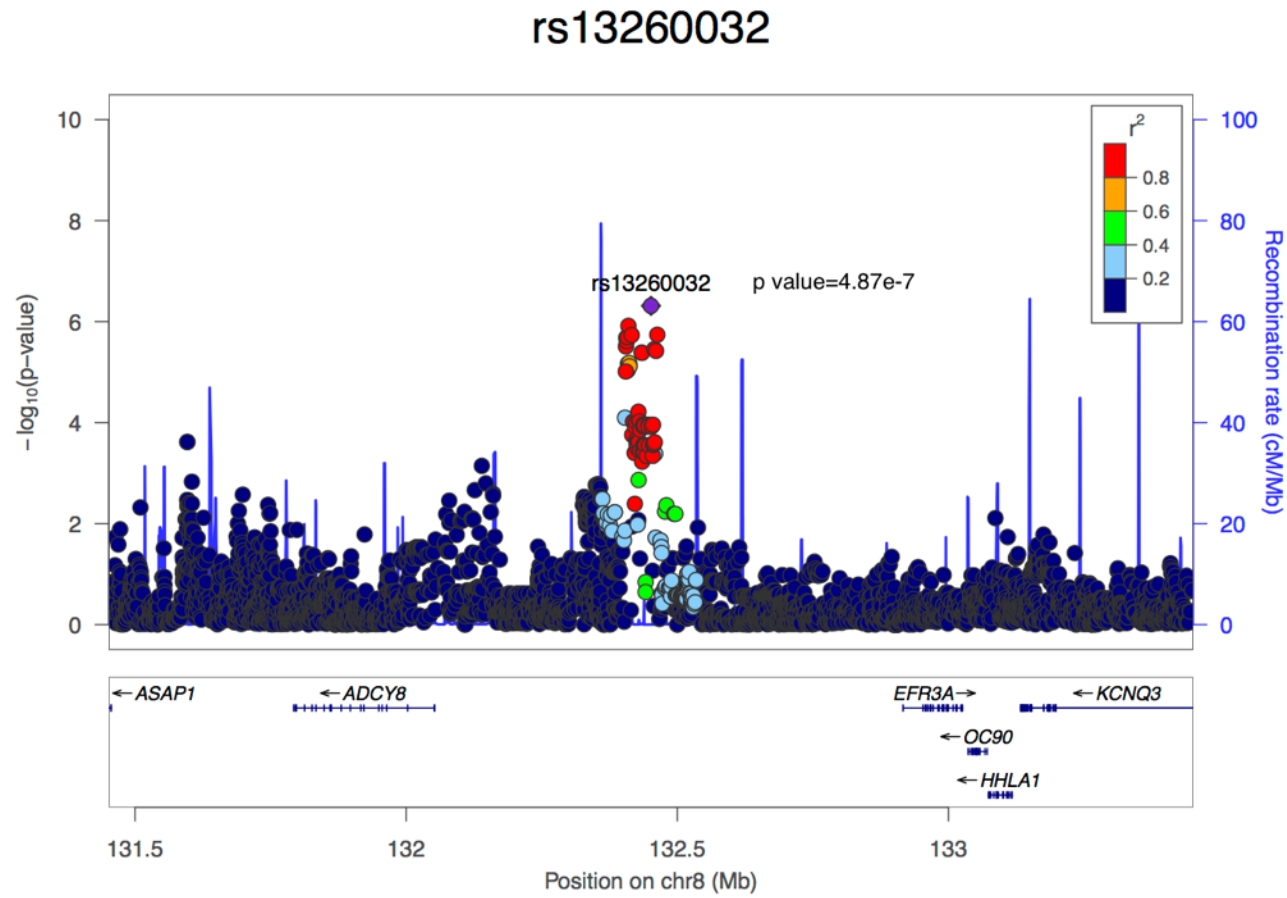

Figure S2.2

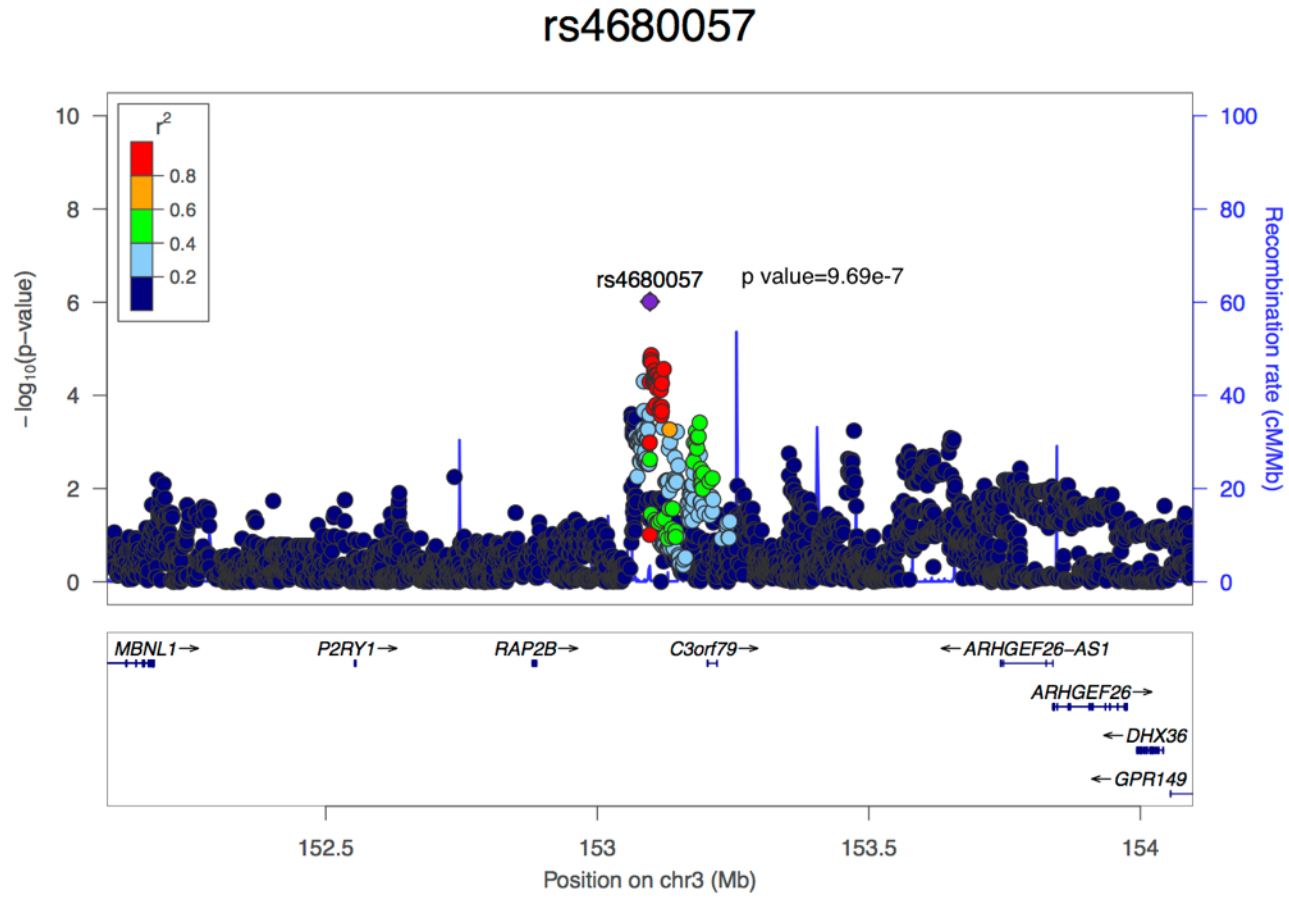

Figure S2.3

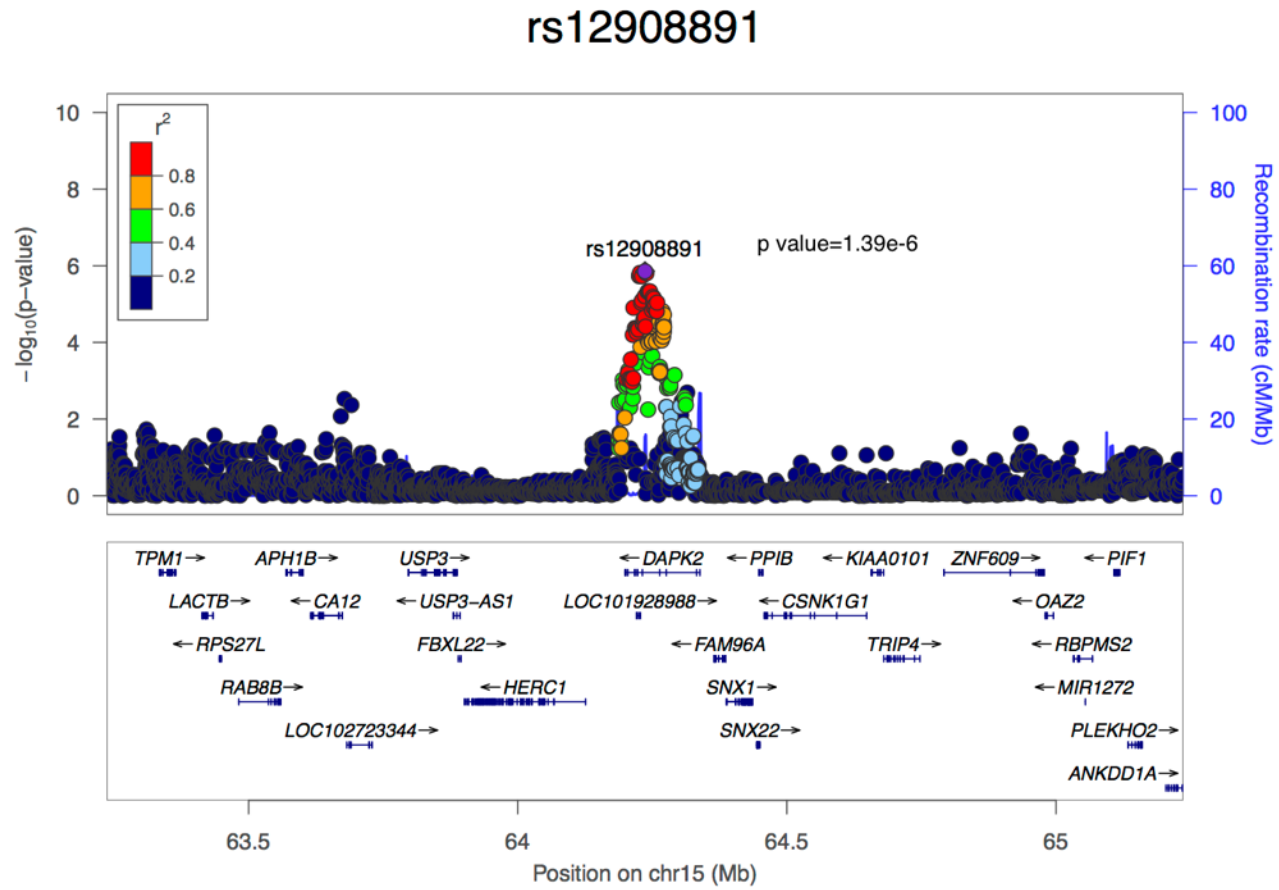

Figure S2.4

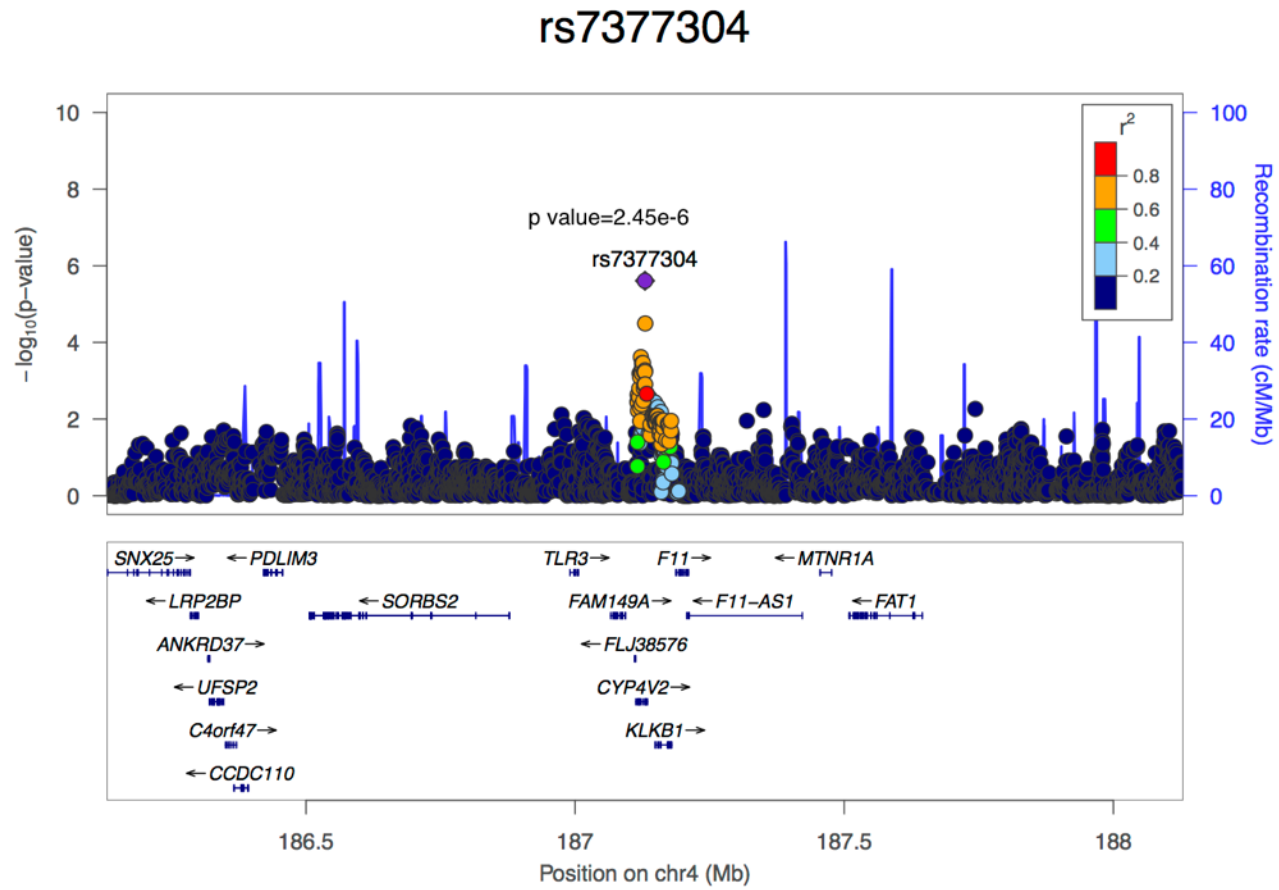

Figure S2.5

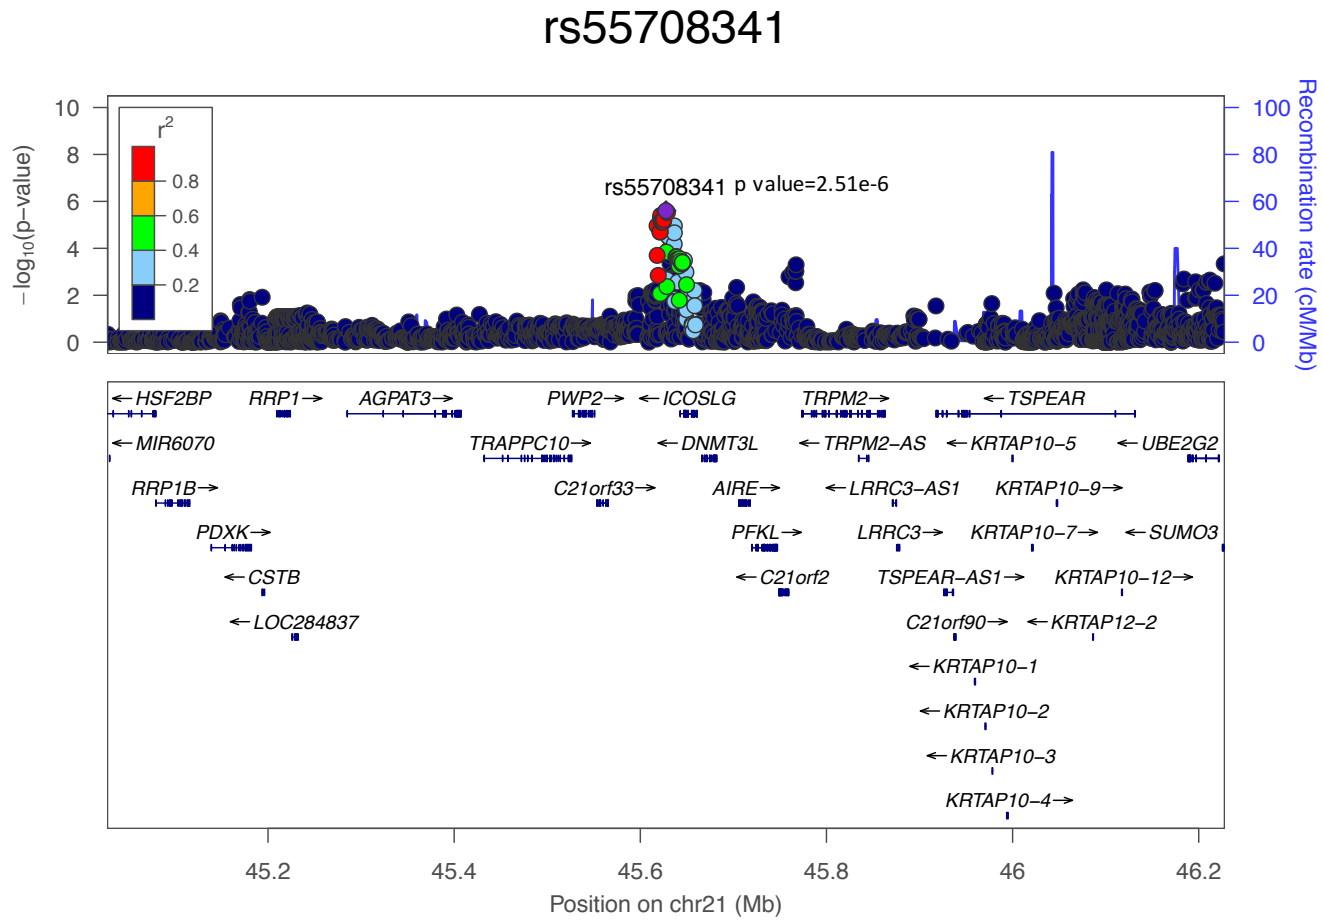

Figure S2.6

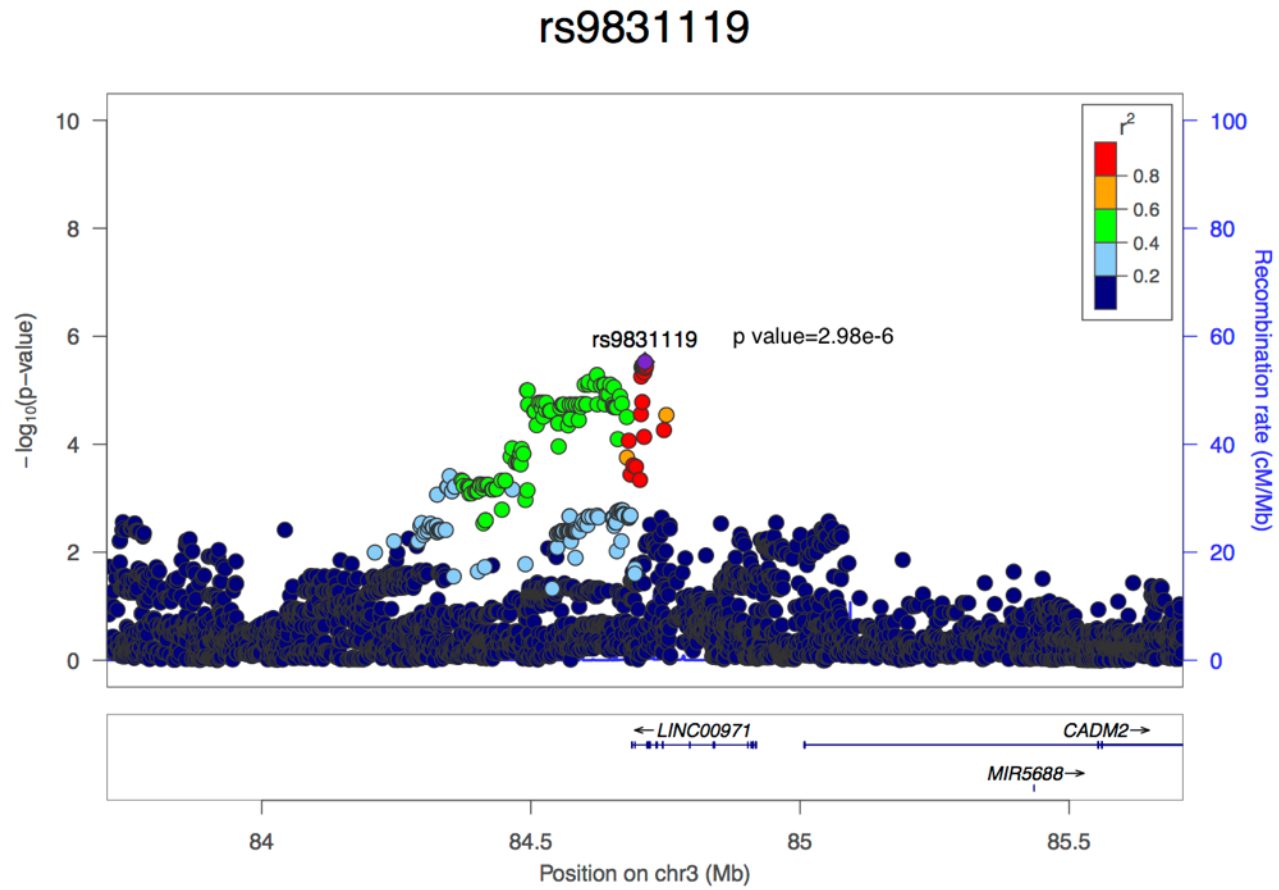

Figure S2.7

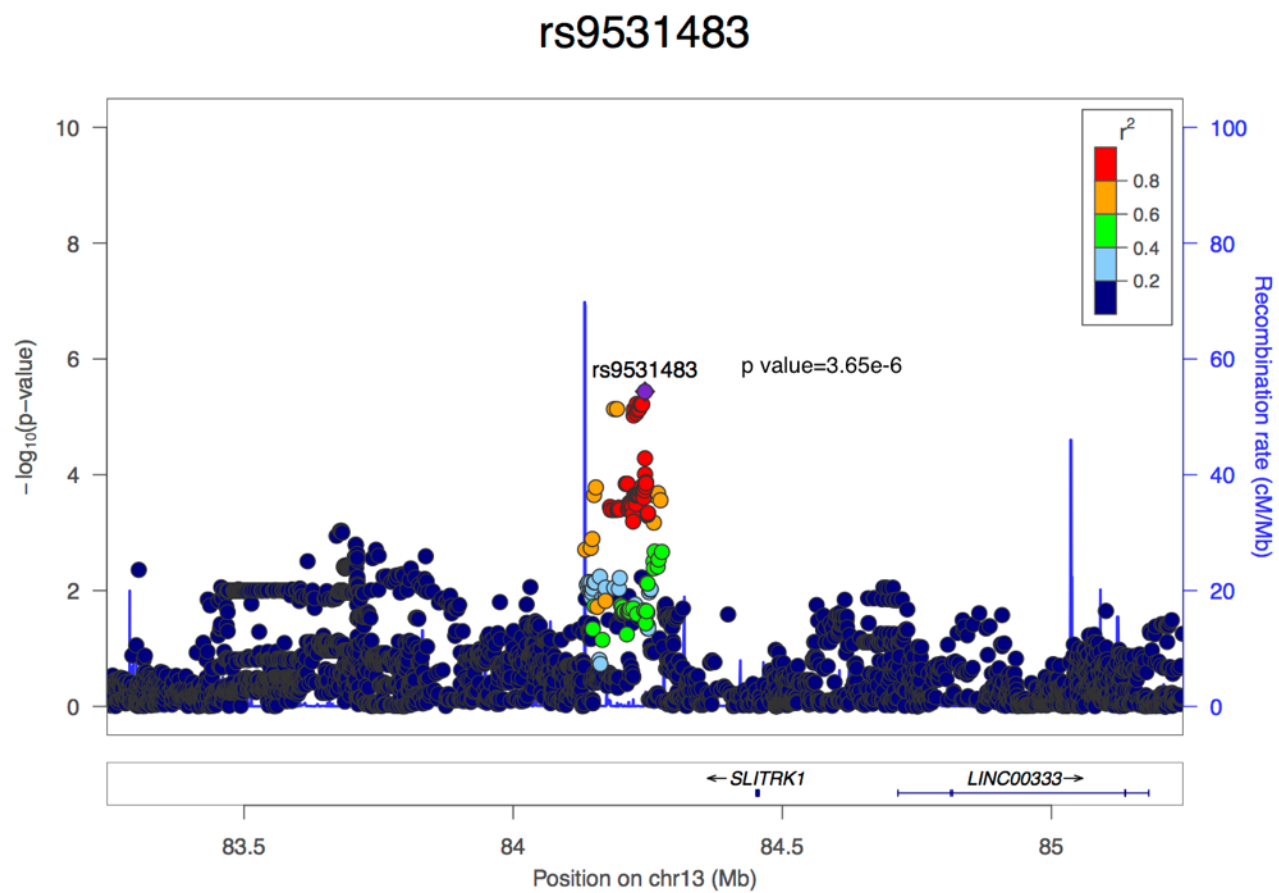

Figure S2.8

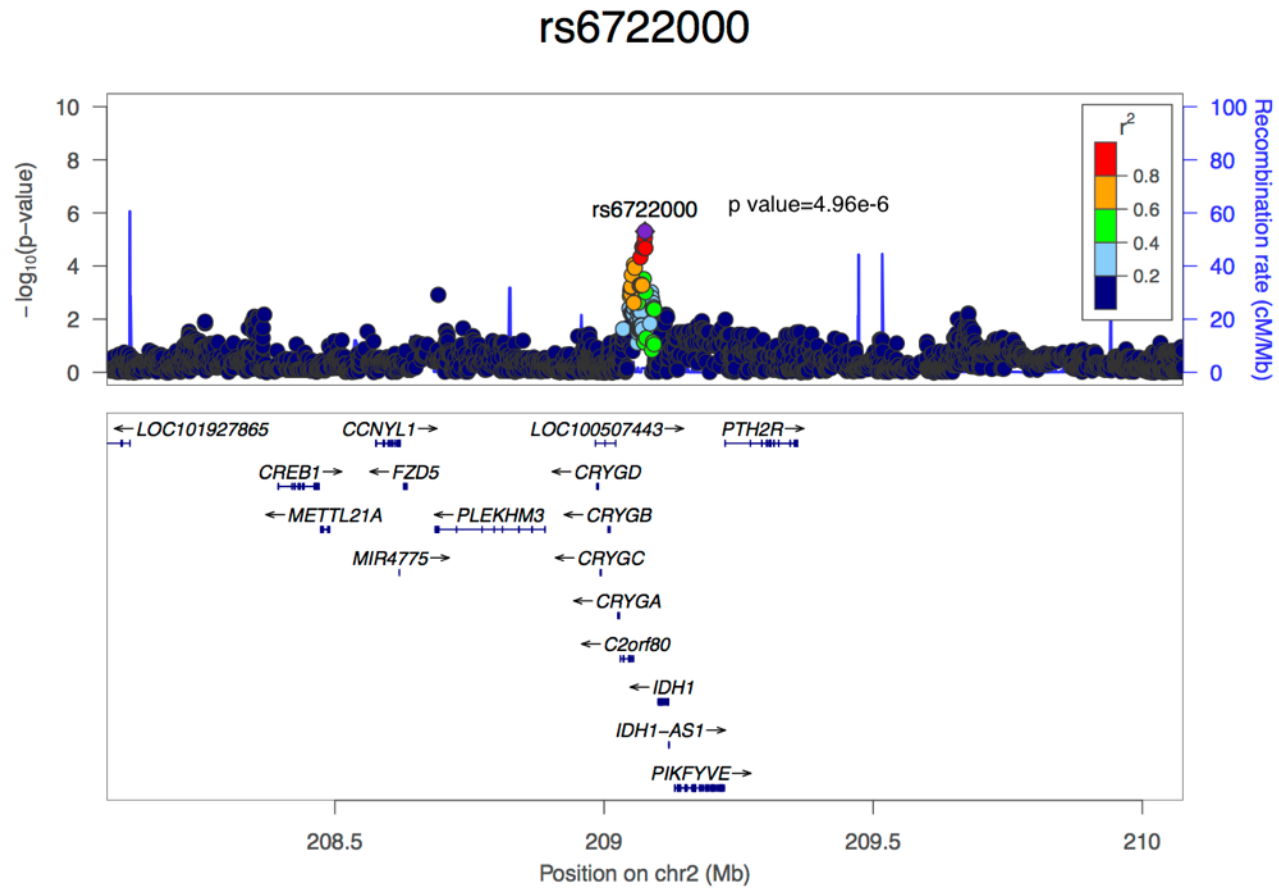



Figure S2.9

rs11923588

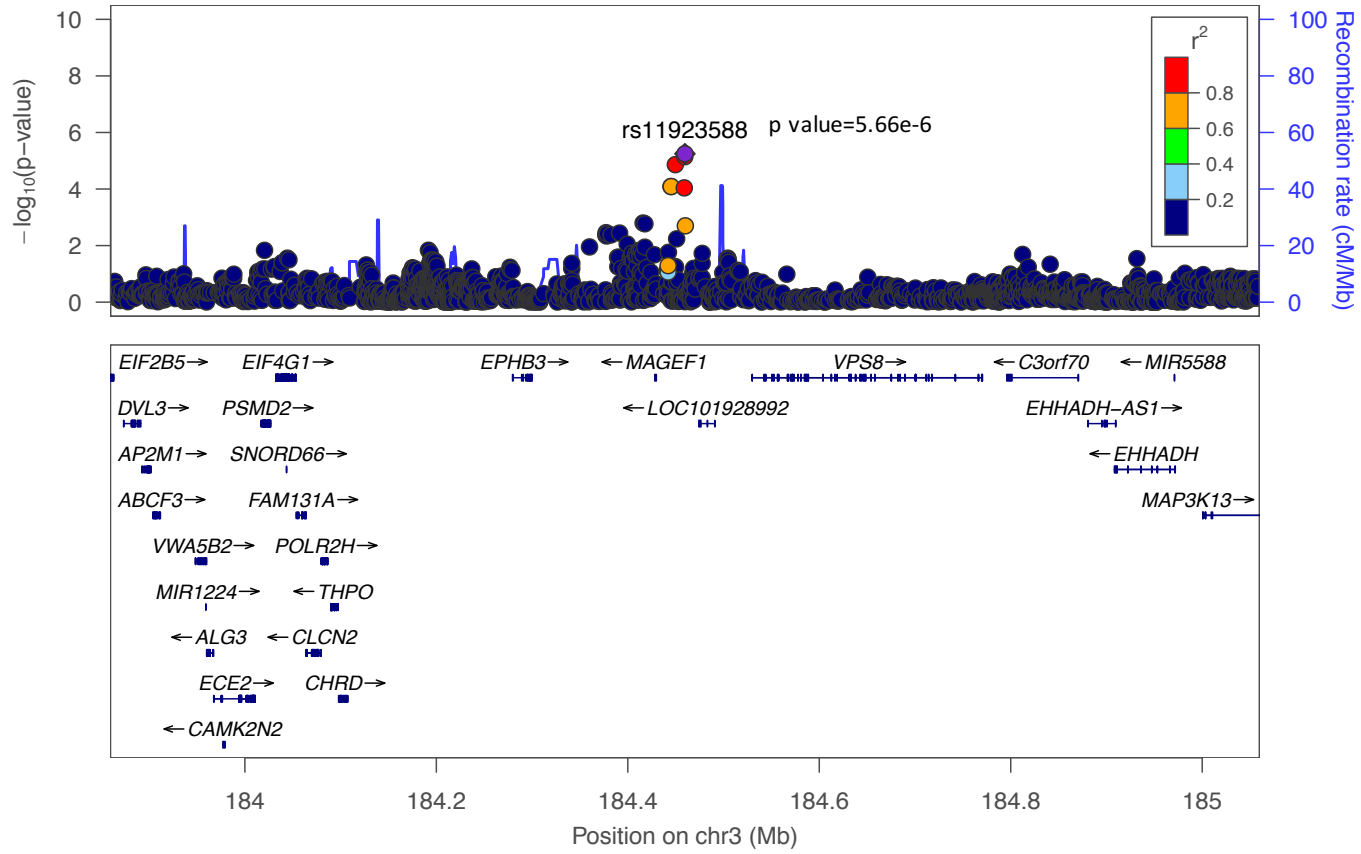

Figure S2.10

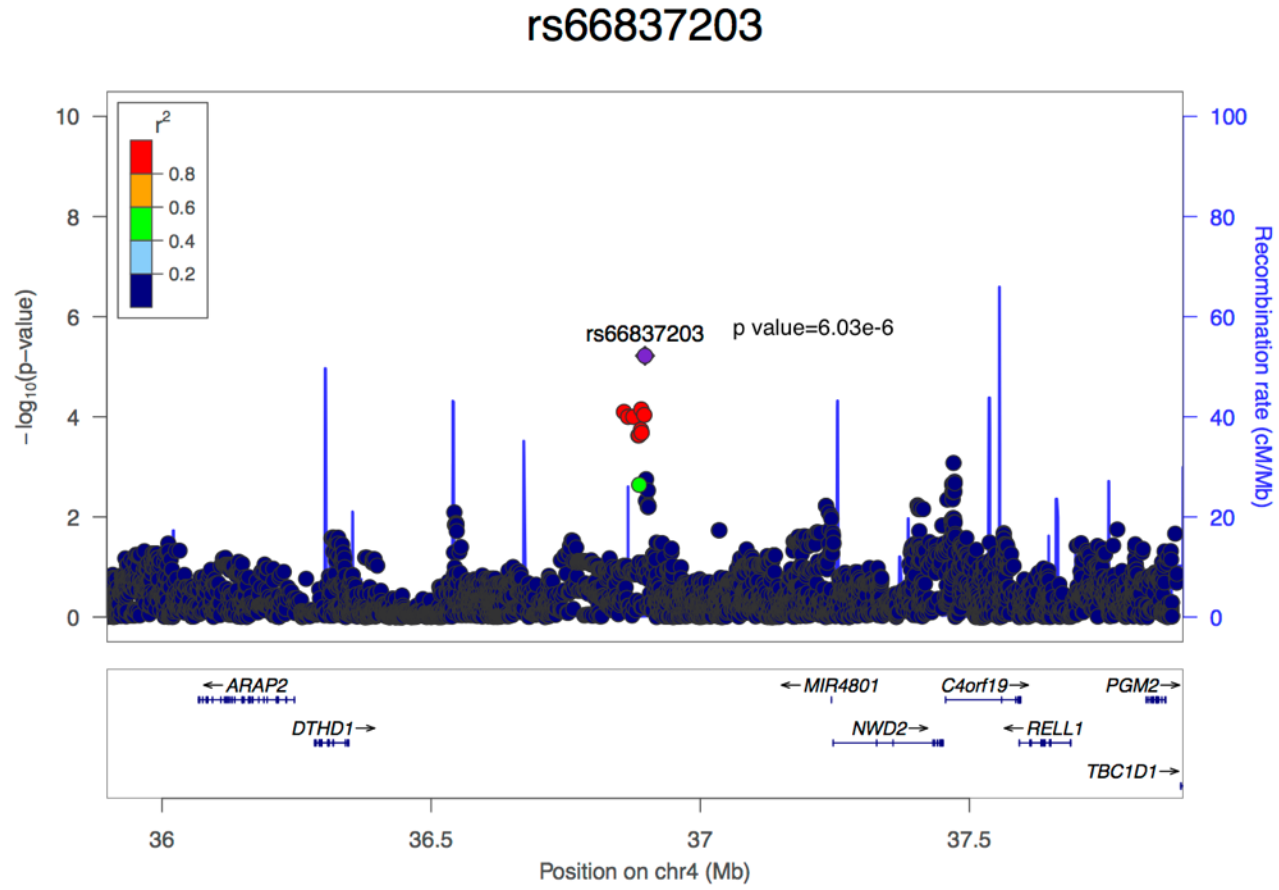

Figure S2.11

rs200028958

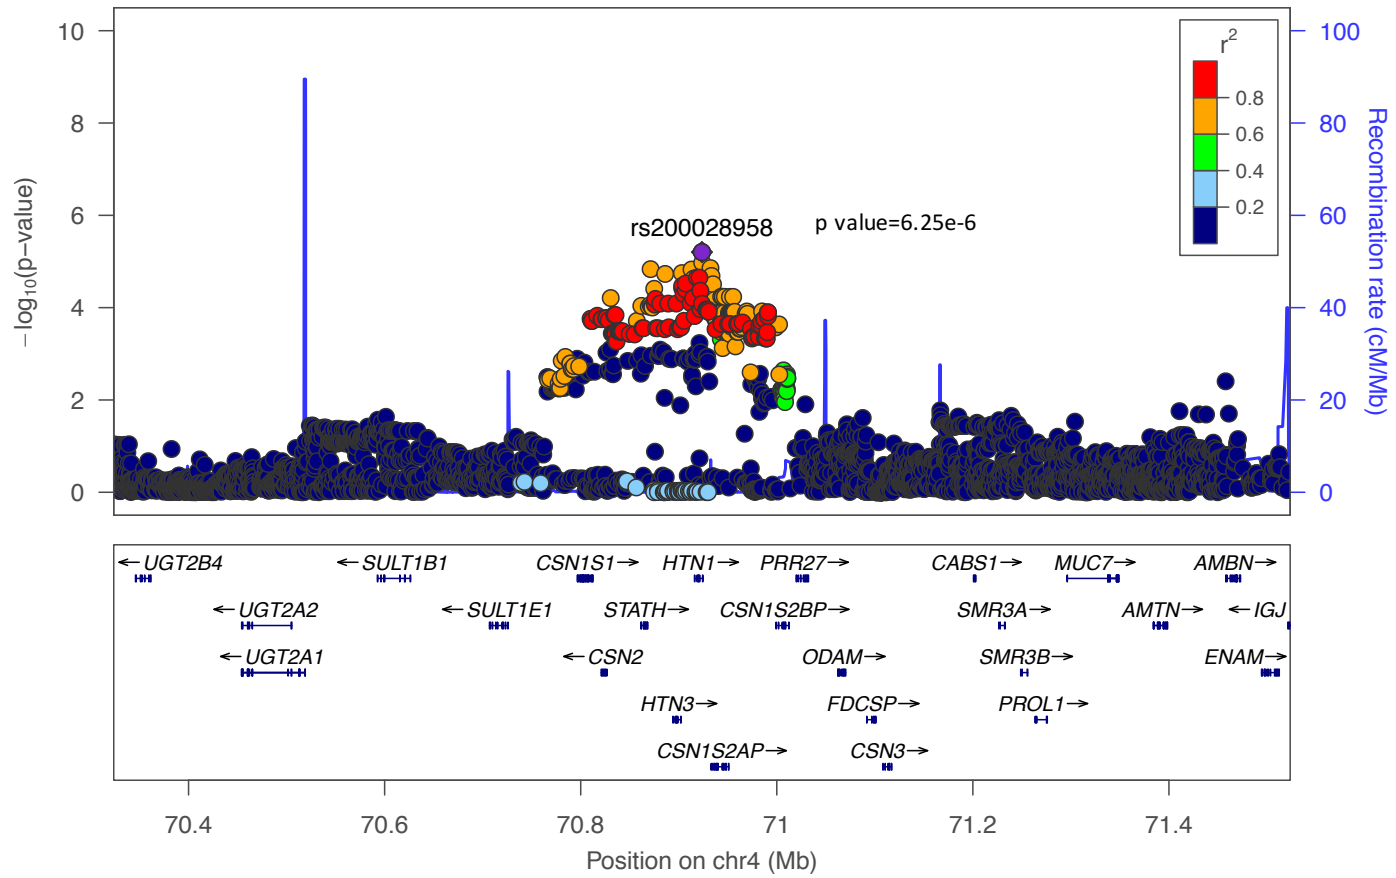

Figure S2.12

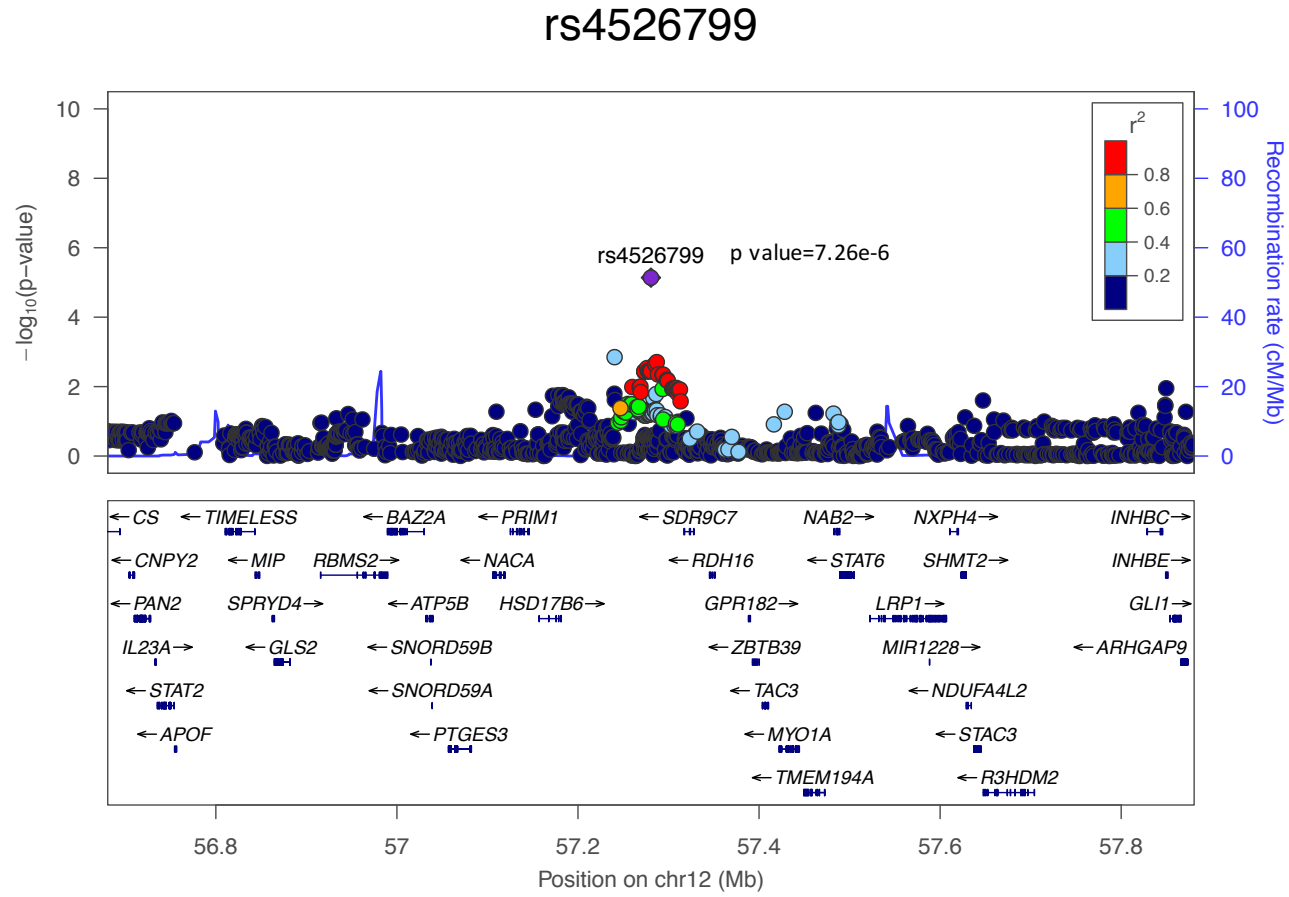

Figure S2.13

rs17105538

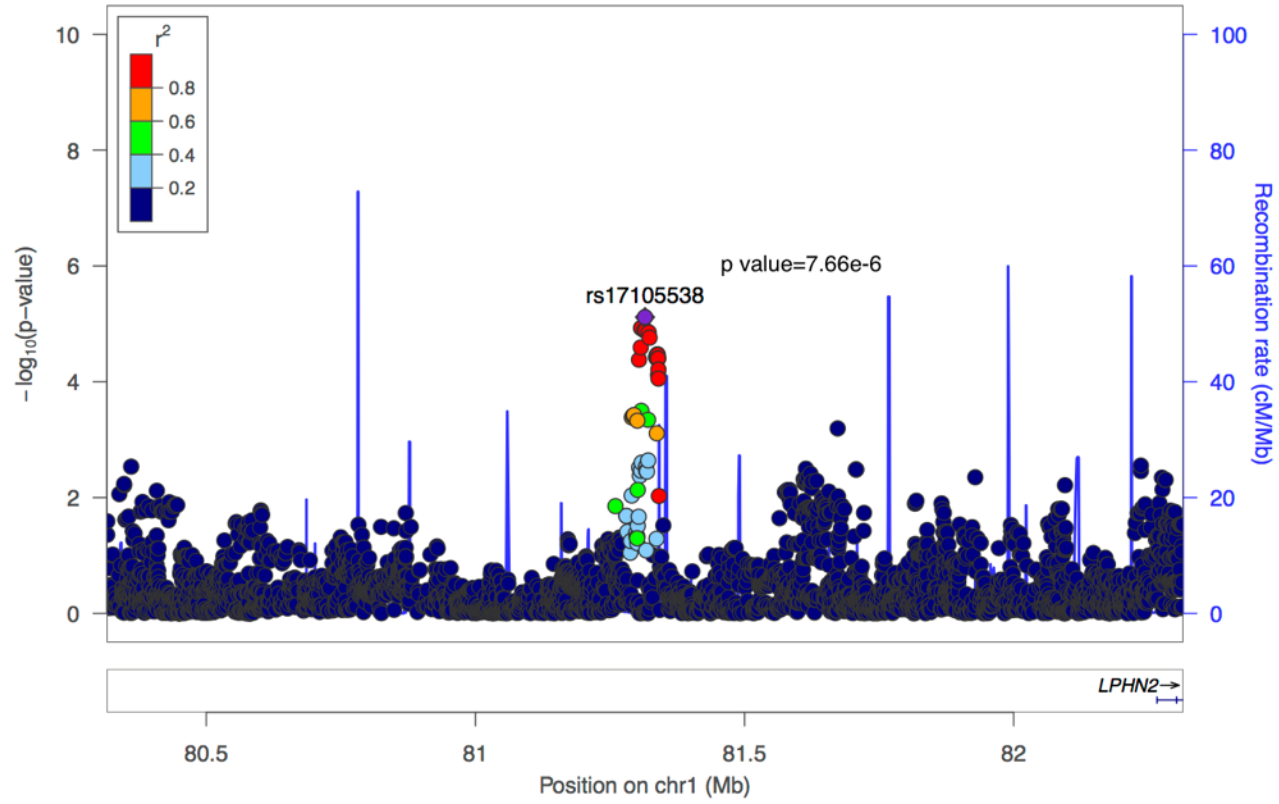

Figure S2.14

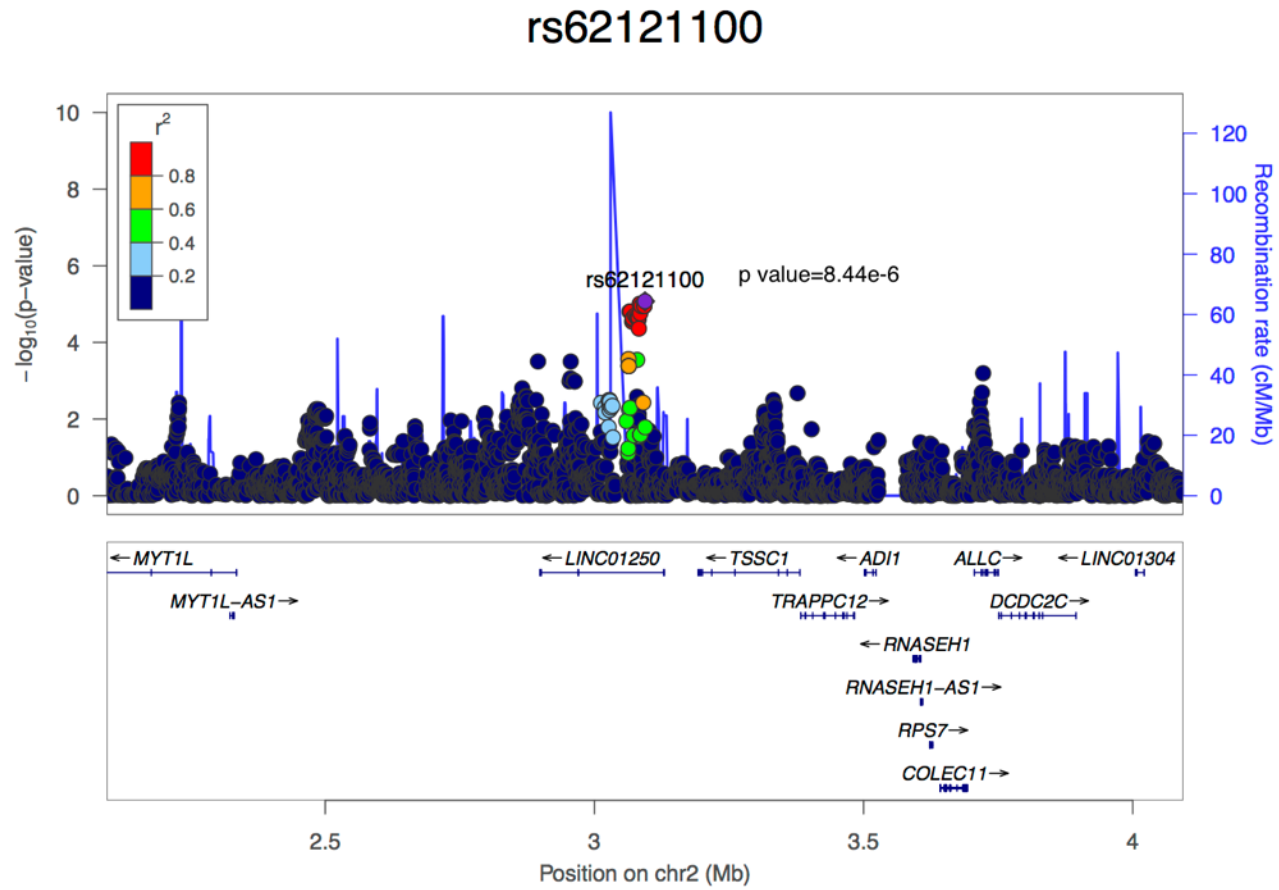

Figure S2.15

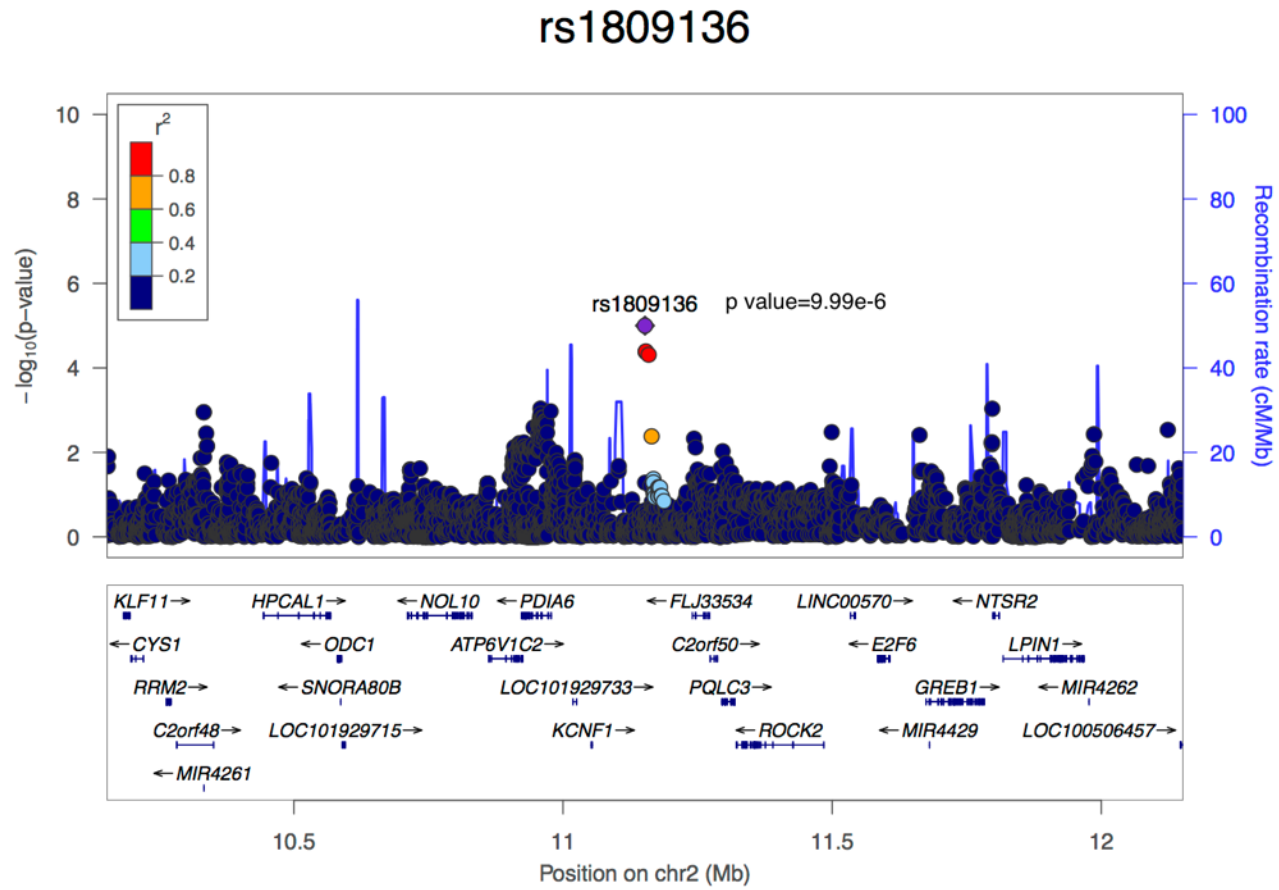





## **ACKNOWLEDGMENTS**

This study was supported by the US National Institutes of Health (NIH) grants AG030653, AG041718, AG005133, AG025516, AG025204, AG044546, AG003991, AG053303, AG054936, and LM012535. The recruitment and clinical characterization of research participants at Washington University were supported by AG05681, AG003991, and AG026276. Data collection and sharing for the Alzheimer's Disease Neuroimaging Initiative (ADNI) was funded by NIH grant U01 AG024904 and DOD ADNI (Department of Defense award number W81XWH-12-2-0012). ADNI is funded by the National Institute on Aging, the National Institute of Biomedical Imaging and Bioengineering, and through generous contributions from the following: Alzheimer's Association; Alzheimer's Drug Discovery Foundation; BioClinica, Inc.; Biogen Idec Inc.; Bristol-Myers Squibb Company; Eisai Inc.; Elan Pharmaceuticals, Inc.; Eli Lilly and Company; F. Hoffmann-La Roche Ltd and its affiliated company Genentech, Inc.; GE Healthcare; Innogenetics, N.V.; IXICO Ltd.; Janssen Alzheimer Immunotherapy Research & Development, LLC.; Johnson & Johnson Pharmaceutical Research & Development LLC.; Medpace, Inc.; Merck & Co., Inc.; Meso Scale Diagnostics, LLC.; NeuroRx Research; Novartis Pharmaceuticals Corporation; Pfizer Inc.; Piramal Imaging; Servier; Synarc Inc.; and Takeda Pharmaceutical Company. The Canadian Institutes of Health Research is providing funds to support ADNI clinical sites in Canada. Private sector contributions are facilitated by the Foundation for the National Institutes of Health ([www.fnih.org](http://www.fnih.org)). The grantee organization is the Northern California Institute for Research and Education, and the study is coordinated by the Alzheimer's Disease Cooperative Study at the University of California, San Diego. ADNI data are disseminated by the Laboratory for Neuro Imaging at the University of Southern California. Samples from the National Cell Repository for AD (NCRAD), which receives government support under a cooperative agreement grant (U24 AG21886) awarded by the National Institute on Aging, were used in this study. Data used in the preparation of this article were obtained from the Alzheimer's Disease

Neuroimaging Initiative (ADNI) database ([adni.loni.usc.edu](http://adni.loni.usc.edu)). As such, the investigators within the ADNI contributed to the design and implementation of ADNI and/or provided data but did not participate in analysis or writing of this report. A complete listing of ADNI investigators can be found at [http://adni.loni.usc.edu/wp-content/uploads/how\\_to\\_apply/ADNI\\_Acknowledgement\\_List.pdf](http://adni.loni.usc.edu/wp-content/uploads/how_to_apply/ADNI_Acknowledgement_List.pdf)

## Supplementary References

1. Mathis CA, Kuller LH, Klunk WE, Snitz BE, Price JC, Weissfeld LA *et al.* In vivo assessment of amyloid-beta deposition in nondemented very elderly subjects. *Ann Neurol* 2013; **73**(6): 751-761.
2. Nebes RD, Snitz BE, Cohen AD, Aizenstein HJ, Saxton JA, Halligan EM *et al.* Cognitive aging in persons with minimal amyloid-beta and white matter hyperintensities. *Neuropsychologia* 2013; **51**(11): 2202-2209.
3. Morris JC, Roe CM, Xiong C, Fagan AM, Goate AM, Holtzman DM *et al.* APOE predicts amyloid-beta but not tau Alzheimer pathology in cognitively normal aging. *Ann Neurol* 2010; **67**(1): 122-131.
4. Swaminathan S, Shen L, Risacher SL, Yoder KK, West JD, Kim S *et al.* Amyloid pathway-based candidate gene analysis of [(11)C]PiB-PET in the Alzheimer's Disease Neuroimaging Initiative (ADNI) cohort. *Brain Imaging Behav* 2012; **6**(1): 1-15.
5. Saykin AJ, Shen L, Yao X, Kim S, Nho K, Risacher SL *et al.* Genetic studies of quantitative MCI and AD phenotypes in ADNI: Progress, opportunities, and plans. *Alzheimers Dement* 2015; **11**(7): 792-814.
6. Jagust WJ, Bandy D, Chen K, Foster NL, Landau SM, Mathis CA *et al.* The Alzheimer's Disease Neuroimaging Initiative positron emission tomography core. *Alzheimers Dement* 2010; **6**(3): 221-229.
7. Deters KD, Risacher SL, Yoder KK, Oblak AL, Unverzagt FW, Murrell JR *et al.* [(11)C]PiB PET in Gerstmann-Straussler-Scheinker disease. *Am J Nucl Med Mol Imaging* 2016; **6**(1): 84-93.
8. Howie BN, Donnelly P, Marchini J. A flexible and accurate genotype imputation method for the next generation of genome-wide association studies. *PLoS Genet* 2009; **5**(6): e1000529.
9. Genomes Project C, Abecasis GR, Altshuler D, Auton A, Brooks LD, Durbin RM *et al.* A map of human genome variation from population-scale sequencing. *Nature* 2010; **467**(7319): 1061-1073.

10. Price AL, Patterson NJ, Plenge RM, Weinblatt ME, Shadick NA, Reich D. Principal components analysis corrects for stratification in genome-wide association studies. *Nat Genet* 2006; **38**(8): 904-909.
11. Bai Z, Han G, Xie B, Wang J, Song F, Peng X *et al.* AlzBase: an Integrative Database for Gene Dysregulation in Alzheimer's Disease. *Mol Neurobiol* 2016; **53**(1): 310-319.
12. Zhang Y, Chen K, Sloan SA, Bennett ML, Scholze AR, O'Keefe S *et al.* An RNA-sequencing transcriptome and splicing database of glia, neurons, and vascular cells of the cerebral cortex. *J Neurosci* 2014; **34**(36): 11929-11947.
13. Zhang Y, Sloan SA, Clarke LE, Caneda C, Plaza CA, Blumenthal PD *et al.* Purification and Characterization of Progenitor and Mature Human Astrocytes Reveals Transcriptional and Functional Differences with Mouse. *Neuron* 2016; **89**(1): 37-53.
14. Consortium GT. The Genotype-Tissue Expression (GTEx) project. *Nat Genet* 2013; **45**(6): 580-585.
15. Zhu Z, Zhang F, Hu H, Bakshi A, Robinson MR, Powell JE *et al.* Integration of summary data from GWAS and eQTL studies predicts complex trait gene targets. *Nat Genet* 2016; **48**(5): 481-487.
16. de Leeuw CA, Mooij JM, Heskes T, Posthuma D. MAGMA: generalized gene-set analysis of GWAS data. *PLoS Comput Biol* 2015; **11**(4): e1004219.
17. Ashburner M, Ball CA, Blake JA, Botstein D, Butler H, Cherry JM *et al.* Gene ontology: tool for the unification of biology. The Gene Ontology Consortium. *Nat Genet* 2000; **25**(1): 25-29.
18. Gene Ontology C. Gene Ontology Consortium: going forward. *Nucleic Acids Res* 2015; **43**(Database issue): D1049-1056.
19. Kanehisa M, Sato Y, Kawashima M, Furumichi M, Tanabe M. KEGG as a reference resource for gene and protein annotation. *Nucleic Acids Res* 2016; **44**(D1): D457-462.
20. Ogata H, Goto S, Sato K, Fujibuchi W, Bono H, Kanehisa M. KEGG: Kyoto Encyclopedia of Genes and Genomes. *Nucleic Acids Res* 1999; **27**(1): 29-34.
21. Fabregat A, Sidiropoulos K, Garapati P, Gillespie M, Hausmann K, Haw R *et al.* The Reactome pathway Knowledgebase. *Nucleic Acids Res* 2016; **44**(D1): D481-487.

22. Croft D, O'Kelly G, Wu G, Haw R, Gillespie M, Matthews L *et al*. Reactome: a database of reactions, pathways and biological processes. *Nucleic Acids Res* 2011; **39**(Database issue): D691-697.
23. Kamboh MI, Demirci FY, Wang X, Minster RL, Carrasquillo MM, Pankratz VS *et al*. Genome-wide association study of Alzheimer's disease. *Transl Psychiatry* 2012; **2**: e117.
