# Supplementary material
Source: PubMed Central journal article supplement (PMC7815516)
Supplement: 41380_2018_246_MOESM2_ESM.pdf [file 41380_2018_246_MOESM2_ESM.pdf]

Table S6. The detailed functional analysis results for 257 target genes

#Gene: genes included in each locus.

#Expression in brain (Barres): Barres Human Brain RNA-Seq (only FPKM > 1 was shown; FPKM > 10 signified by \*)

#AD sum: Total number of differential expression from all transcriptome studies of Alzheimer's disease (AD).

#AD Up: Total number of up regulation from all transcriptome studies of AD.

#AD Dn: Total number of down regulation from all transcriptome studies of AD.

#AD Pe: Total number of dys-regulation with unknown direction from all transcriptome studies of AD.

#The highlighted AD\_sum, AD\_Up, AD\_Dn and AD\_Pe indicate Genes up- or downregulated exclusively in two or more studies

#Blood.lowest.p\_eQTL: The lowest eQTL p-value between any SNP and the corresponding gene in whole blood

#Blood.lowest.p\_SMR: The lowest SMR p-value between any SNP and the corresponding gene in whole blood

#Brain.lowest.p\_eQTL: The lowest eQTL p-value between any SNP and the corresponding gene in any brain tissues

#Brain.lowest.p\_SMR: The lowest SMR p-value between any SNP and the corresponding gene in any brain tissues

#Pathway: Nominally significant pathways (p-value<0.05) including the corresponding gene

#Non-APOE locus pathway: Nominally significant pathways (p-value<0.05) including the corresponding gene and not including APOE-locus genes

| Gene             | Locus         | Chr | Expression in brain (Barres)                                                                | AD_sum | AD_Up | AD_Dn | AD_Pe | Blood.lowest.p_eQTL | Blood.lowest.p_SMR | Brain.lowest.p_eQTL | Brain.lowest.p_SMR |
|------------------|---------------|-----|---------------------------------------------------------------------------------------------|--------|-------|-------|-------|---------------------|--------------------|---------------------|--------------------|
| APOC1            | APOE          | 19  | NA                                                                                          | 11     | 11    | 0     | 0     | NA                  | NA                 | 0.0130436           | 0.01714493         |
| APOC1P1          | APOE          | 19  | NA                                                                                          | NA     | NA    | NA    | NA    | NA                  | NA                 | 0.0169751           | 0.0214768          |
| APOC2            | APOE          | 19  | NA                                                                                          | 3      | 2     | 1     | 0     | NA                  | NA                 | 0.0271157           | 0.03207496         |
| APOC4            | APOE          | 19  | NA                                                                                          | 2      | 1     | 1     | 0     | NA                  | NA                 | 0.00309672          | 0.006630909        |
| APOC4-APOC2      | APOE          | 19  | NA                                                                                          | NA     | NA    | NA    | NA    | NA                  | NA                 | NA                  | NA                 |
| APOE             | APOE          | 19  | MatureAstrocytes,FetalAstrocytes                                                            | 4      | 4     | 0     | 0     | NA                  | NA                 | 0.006062548         | 0.008965919        |
| BCAM             | APOE          | 19  | NA                                                                                          | 3      | 3     | 0     | 0     | NA                  | NA                 | 0.0114098           | 0.01718973         |
| BCL3             | APOE          | 19  | NA                                                                                          | 5      | 5     | 0     | 0     | NA                  | NA                 | 0.03741179          | 0.04308533         |
| BLOC1S3          | APOE          | 19  | Endothelial                                                                                 | NA     | NA    | NA    | NA    | 0.02308549          | 0.02813479         | NA                  | NA                 |
| CBLC             | APOE          | 19  | NA                                                                                          | 0      | 0     | 0     | 0     | NA                  | NA                 | NA                  | NA                 |
| CD3EAP           | APOE          | 19  | NA                                                                                          | NA     | NA    | NA    | NA    | 0.00216876          | 0.003192043        | 0.000291562         | 0.000849297        |
| CEACAM16         | APOE          | 19  | NA                                                                                          | NA     | NA    | NA    | NA    | NA                  | NA                 | NA                  | NA                 |
| CEACAM19         | APOE          | 19  | NA                                                                                          | 2      | 0     | 2     | 0     | 0.02056821          | 0.02533825         | 0.0272381           | 0.03581018         |
| CEACAM20         | APOE          | 19  | NA                                                                                          | NA     | NA    | NA    | NA    | 1                   | 1                  | NA                  | NA                 |
| CEACAM22P        | APOE          | 19  | NA                                                                                          | NA     | NA    | NA    | NA    | 1                   | 1                  | NA                  | NA                 |
| CKM              | APOE          | 19  | NA                                                                                          | NA     | NA    | NA    | NA    | 0.0457541           | 0.05437545         | 0.0106896           | 0.01660494         |
| CLASRP           | APOE          | 19  | NA                                                                                          | 6      | 6     | 0     | 0     | 0.008379739         | 0.01403407         | 0.00332479          | 0.005458997        |
| CLPTM1           | APOE          | 19  | MatureAstrocytes*,FetalAstrocytes,Neurons,Endothelial,Oligodendrocytes,Microglia/Macrophage | 7      | 2     | 5     | 0     | NA                  | NA                 | 0.008161097         | 0.01311337         |
| ERCC1            | APOE          | 19  | Microglia/Macrophage*,FetalAstrocytes,MatureAstrocytes,Neurons,Oligodendrocytes,Endothelial | 1      | 0     | 1     | 0     | 1                   | 1                  | 0.003903099         | 0.006265742        |
| ERCC2            | APOE          | 19  | NA                                                                                          | 4      | 0     | 4     | 0     | 0.0285481           | 0.03387421         | 0.0131752           | 0.01725854         |
| EXOC3L2          | APOE          | 19  | NA                                                                                          | 0      | 0     | 0     | 0     | 0.00431701          | 0.008978838        | 0.0277449           | 0.03299044         |
| GEMIN7           | APOE          | 19  | FetalAstrocytes,Neurons                                                                     | 1      | 0     | 1     | 0     | NA                  | NA                 | 0.0124582           | 0.01635656         |
| IGSF23           | APOE          | 19  | NA                                                                                          | NA     | NA    | NA    | NA    | 0.0445799           | 0.05416729         | NA                  | NA                 |
| KLC3             | APOE          | 19  | NA                                                                                          | NA     | NA    | NA    | NA    | 0.041254            | 0.05070623         | 0.0167149           | 0.02370563         |
| MARK4            | APOE          | 19  | FetalAstrocytes                                                                             | 6      | 1     | 5     | 0     | NA                  | NA                 | 0.0455546           | 0.05146517         |
| MIR4531          | APOE          | 19  | NA                                                                                          | NA     | NA    | NA    | NA    | NA                  | NA                 | NA                  | NA                 |
| MIR8085          | APOE          | 19  | NA                                                                                          | NA     | NA    | NA    | NA    | NA                  | NA                 | NA                  | NA                 |
| NKPD1            | APOE          | 19  | NA                                                                                          | 1      | 1     | 0     | 0     | 0.0253115           | 0.03445331         | 0.000293253         | 0.00156271         |
| PPP1R13L         | APOE          | 19  | NA                                                                                          | 6      | 6     | 0     | 0     | NA                  | NA                 | 0.04719221          | 0.05615469         |
| PPP1R37          | APOE          | 19  | NA                                                                                          | NA     | NA    | NA    | NA    | NA                  | NA                 | 0.000341028         | 0.001896521        |
| PVR              | APOE          | 19  | NA                                                                                          | NA     | NA    | NA    | NA    | NA                  | NA                 | 0.0129687           | 0.02099118         |
| PVRL2            | APOE          | 19  | Endothelial,FetalAstrocytes,MatureAstrocytes                                                | 3      | 3     | 0     | 0     | 0.0284957           | 0.03383601         | 0.009117321         | 0.01466462         |
| RELB             | APOE          | 19  | NA                                                                                          | 1      | 1     | 0     | 0     | NA                  | NA                 | 0.0162579           | 0.02354847         |
| TOMM40           | APOE          | 19  | NA                                                                                          | 1      | 0     | 1     | 0     | NA                  | NA                 | 0.0172514           | 0.02153904         |
| TRAPPC6A         | APOE          | 19  | NA                                                                                          | 6      | 0     | 6     | 0     | NA                  | NA                 | 0.0117093           | 0.01889504         |
| ZNF180           | APOE          | 19  | FetalAstrocytes,Neurons                                                                     | 1      | 1     | 0     | 0     | NA                  | NA                 | 0.000224494         | 0.001364411        |
| ZNF229           | APOE          | 19  | NA                                                                                          | NA     | NA    | NA    | NA    | NA                  | NA                 | 0.009165888         | 0.01263481         |
| ZNF296           | APOE          | 19  | NA                                                                                          | 2      | 1     | 1     | 0     | NA                  | NA                 | 0.00121543          | 0.003835691        |
| ADCY8            | ADCY8,EFR3A   | 8   | MatureAstrocytes,Neurons                                                                    | 2      | 1     | 1     | 0     | NA                  | NA                 | 0.003887251         | 0.01794854         |
| EFR3A            | ADCY8,EFR3A   | 8   | Neurons*,FetalAstrocytes,MatureAstrocytes,Oligodendrocytes,Microglia/Macrophage,Endothelial | 1      | 1     | 0     | 0     | NA                  | NA                 | 0.02375819          | 0.04567933         |
| 7SK              | ADCY8,EFR3A   | 8   | NA                                                                                          | NA     | NA    | NA    | NA    | NA                  | NA                 | NA                  | NA                 |
| RAP2B            | RAP2B,C3orf79 | 3   | Microglia/Macrophage,Neurons,FetalAstrocytes,Oligodendrocytes,MatureAstrocytes              | 1      | 1     | 0     | 0     | NA                  | NA                 | 0.003429461         | 0.02490314         |
| C3orf79          | RAP2B,C3orf79 | 3   | NA                                                                                          | NA     | NA    | NA    | NA    | NA                  | NA                 | NA                  | NA                 |
| AK092619ARHGEF26 | RAP2B,C3orf79 | 3   | NA                                                                                          | NA     | NA    | NA    | NA    | NA                  | NA                 | NA                  | NA                 |
| ARHGEF26-AS1     | RAP2B,C3orf79 | 3   | MatureAstrocytes,Neurons                                                                    | NA     | NA    | NA    | NA    | NA                  | NA                 | 0.009571812         | 0.05225144         |



|              |                     |    |                                                                                                 |    |    |    |    |            |            |             |             |    |
|--------------|---------------------|----|-------------------------------------------------------------------------------------------------|----|----|----|----|------------|------------|-------------|-------------|----|
| KRTAP10-9    | C21orf33,ICOSLG     | 21 | NA                                                                                              | NA | NA | NA | NA | NA         | NA         | NA          | NA          | NA |
| KRTAP12-1    | C21orf33,ICOSLG     | 21 | NA                                                                                              | NA | NA | NA | NA | NA         | NA         | NA          | NA          | NA |
| KRTAP12-2    | C21orf33,ICOSLG     | 21 | NA                                                                                              | NA | NA | NA | NA | NA         | NA         | NA          | NA          | NA |
| KRTAP12-3    | C21orf33,ICOSLG     | 21 | NA                                                                                              | NA | NA | NA | NA | NA         | NA         | NA          | NA          | NA |
| KRTAP12-4    | C21orf33,ICOSLG     | 21 | NA                                                                                              | NA | NA | NA | NA | NA         | NA         | NA          | NA          | NA |
| LOC284837    | C21orf33,ICOSLG     | 21 | NA                                                                                              | NA | NA | NA | NA | NA         | NA         | NA          | NA          | NA |
| LRRC3        | C21orf33,ICOSLG     | 21 | NA                                                                                              | NA | NA | NA | NA | NA         | NA         | 0.00278988  | 0.01670277  |    |
| LRRC3-AS1    | C21orf33,ICOSLG     | 21 | NA                                                                                              | NA | NA | NA | NA | NA         | NA         | 0.01305419  | 0.0425205   |    |
| PDXK         | C21orf33,ICOSLG     | 21 | MatureAstrocytes,Neurons,Endothelial                                                            | 5  | 3  | 2  | 0  | NA         | NA         | NA          | NA          | NA |
| PFKL         | C21orf33,ICOSLG     | 21 | FetalAstrocytes                                                                                 | NA | NA | NA | NA | NA         | NA         | 0.03995329  | 0.07600761  |    |
| PWP2         | C21orf33,ICOSLG     | 21 | NA                                                                                              | 1  | 1  | 0  | 0  | NA         | NA         | NA          | NA          | NA |
| RRP1         | C21orf33,ICOSLG     | 21 | FetalAstrocytes                                                                                 | NA | NA | NA | NA | NA         | NA         | 0.005592472 | 0.02326094  |    |
| TRAPPC10     | C21orf33,ICOSLG     | 21 | Microglia/Macrophage,Neurons,Oligodendrocytes,FetalAstrocytes,MatureAstrocytes                  | NA | NA | NA | NA | NA         | NA         | 0.0186256   | 0.04433238  |    |
| TRPM2        | C21orf33,ICOSLG     | 21 | NA                                                                                              | 2  | 0  | 2  | 0  | NA         | NA         | NA          | NA          | NA |
| TRPM2-AS     | C21orf33,ICOSLG     | 21 | NA                                                                                              | NA | NA | NA | NA | NA         | NA         | NA          | NA          | NA |
| TSPEAR       | C21orf33,ICOSLG     | 21 | NA                                                                                              | NA | NA | NA | NA | 0.0276463  | 0.1173633  | NA          | NA          | NA |
| TSPEAR-AS1   | C21orf33,ICOSLG     | 21 | NA                                                                                              | NA | NA | NA | NA | NA         | NA         | 0.03589631  | 0.06506584  |    |
| HSF2BP       | C21orf33,ICOSLG     | 21 | NA                                                                                              | 1  | 1  | 0  | 0  | 0.03786589 | 0.1188581  | 0.0138905   | 0.03622745  |    |
| RRP1B        | C21orf33,ICOSLG     | 21 | FetalAstrocytes,Neurons,Endothelial                                                             | 1  | 1  | 0  | 0  | 0.0429562  | 0.06843161 | 0.006256578 | 0.02551044  |    |
| UBE2G2       | C21orf33,ICOSLG     | 21 | FetalAstrocytes,MatureAstrocytes,Neurons,Oligodendrocytes,Microglia/Macrophage,Endothelial      | NA | NA | NA | NA | NA         | NA         | 0.0101961   | 0.03228033  |    |
| C21orf67     | C21orf33,ICOSLG     | 21 | NA                                                                                              | NA | NA | NA | NA | NA         | NA         | 0.009335018 | 0.02971858  |    |
| LINC00971    | LINC00971           | 3  | NA                                                                                              | NA | NA | NA | NA | NA         | NA         | NA          | NA          | NA |
| CADM2        | LINC00971           | 3  | MatureAstrocytes*,Neurons*,Oligodendrocytes*,FetalAstrocytes,Endothelial                        | 5  | 0  | 5  | 0  | NA         | NA         | 0.001500799 | 0.009292013 |    |
| SLITRK1      | SLITRK1             | 13 | Neurons,Oligodendrocytes                                                                        | 5  | 1  | 4  | 0  | NA         | NA         | 0.0212201   | 0.06841025  |    |
| LINC00333    | SLITRK1             | 13 | NA                                                                                              | NA | NA | NA | NA | NA         | NA         | NA          | NA          | NA |
| C2orf80      | C2orf80,IDH1        | 2  | Neurons*,Oligodendrocytes                                                                       | 12 | 0  | 12 | 0  | NA         | NA         | 0.00241572  | 0.02103459  |    |
| CCNYL1       | C2orf80,IDH1        | 2  | FetalAstrocytes,MatureAstrocytes,Neurons,Oligodendrocytes,Microglia/Macrophage,Endothelial      | 1  | 1  | 0  | 0  | NA         | NA         | 0.0181751   | 0.05618972  |    |
| CRYGA        | C2orf80,IDH1        | 2  | NA                                                                                              | 1  | 1  | 0  | 0  | NA         | NA         | NA          | NA          | NA |
| CRYGB        | C2orf80,IDH1        | 2  | NA                                                                                              | 1  | 0  | 1  | 0  | NA         | NA         | NA          | NA          | NA |
| CRYGC        | C2orf80,IDH1        | 2  | NA                                                                                              | NA | NA | NA | NA | NA         | NA         | NA          | NA          | NA |
| CRYGD        | C2orf80,IDH1        | 2  | FetalAstrocytes                                                                                 | 1  | 1  | 0  | 0  | NA         | NA         | 0.0161334   | 0.05750588  |    |
| FZD5         | C2orf80,IDH1        | 2  | FetalAstrocytes                                                                                 | 3  | 3  | 0  | 0  | NA         | NA         | 0.0309839   | 0.06655298  |    |
| IDH1         | C2orf80,IDH1        | 2  | FetalAstrocytes,Microglia/Macrophage,MatureAstrocytes,Oligodendrocytes,Neurons                  | 2  | 0  | 2  | 0  | NA         | NA         | 0.007434959 | 0.03330903  |    |
| IDH1-AS1     | C2orf80,IDH1        | 2  | NA                                                                                              | NA | NA | NA | NA | NA         | NA         | 6.48868E-05 | 0.008377588 |    |
| JA429503     | C2orf80,IDH1        | 2  | NA                                                                                              | NA | NA | NA | NA | NA         | NA         | NA          | NA          | NA |
| LOC100507443 | C2orf80,IDH1        | 2  | NA                                                                                              | NA | NA | NA | NA | NA         | NA         | NA          | NA          | NA |
| MIR4775      | C2orf80,IDH1        | 2  | NA                                                                                              | NA | NA | NA | NA | NA         | NA         | NA          | NA          | NA |
| Mir_548      | C2orf80,IDH1        | 2  | NA                                                                                              | NA | NA | NA | NA | NA         | NA         | NA          | NA          | NA |
| PIKFYVE      | C2orf80,IDH1        | 2  | MatureAstrocytes,Neurons,FetalAstrocytes,Microglia/Macrophage,Oligodendrocytes,Endothelial      | 2  | 1  | 1  | 0  | 0.00232473 | 0.02237377 | 0.002468939 | 0.02265926  |    |
| PLEKHM3      | C2orf80,IDH1        | 2  | Neurons,Oligodendrocytes,MatureAstrocytes,Microglia/Macrophage,Endothelial,FetalAstrocytes      | 1  | 0  | 1  | 0  | NA         | NA         | 0.0103876   | 0.02991419  |    |
| PTH2R        | C2orf80,IDH1        | 2  | Neurons                                                                                         | 4  | 0  | 4  | 0  | NA         | NA         | 0.008929127 | 0.03633748  |    |
| ALG3         | MAGEF1,LOC101928992 | 3  | FetalAstrocytes,MatureAstrocytes                                                                | NA | NA | NA | NA | NA         | NA         | 0.02722891  | 0.06037791  |    |
| C3orf70      | MAGEF1,LOC101928992 | 3  | FetalAstrocytes,MatureAstrocytes,Neurons,Oligodendrocytes,Microglia/Macrophage                  | 0  | 0  | 0  | 0  | NA         | NA         | 0.04598209  | 0.06679984  |    |
| CAMK2N2      | MAGEF1,LOC101928992 | 3  | Neurons,Endothelial                                                                             | NA | NA | NA | NA | NA         | NA         | 0.01059     | 0.03614694  |    |
| CHRD         | MAGEF1,LOC101928992 | 3  | NA                                                                                              | 1  | 0  | 1  | 0  | 0.0115377  | 0.02654106 | 0.0425987   | 0.09908303  |    |
| CLCN2        | MAGEF1,LOC101928992 | 3  | NA                                                                                              | 2  | 1  | 1  | 0  | NA         | NA         | NA          | NA          | NA |
| ECE2         | MAGEF1,LOC101928992 | 3  | Neurons                                                                                         | 3  | 2  | 1  | 0  | NA         | NA         | NA          | NA          | NA |
| EHHADH       | MAGEF1,LOC101928992 | 3  | MatureAstrocytes                                                                                | NA | NA | NA | NA | NA         | NA         | 0.009567481 | 0.03414038  |    |
| EHHADH-AS1   | MAGEF1,LOC101928992 | 3  | NA                                                                                              | NA | NA | NA | NA | NA         | NA         | NA          | NA          | NA |
| EIF4G1       | MAGEF1,LOC101928992 | 3  | FetalAstrocytes*,MatureAstrocytes,Neurons,Oligodendrocytes,Microglia/Macrophage,Endothelial     | NA | NA | NA | NA | NA         | NA         | 0.0101147   | 0.03504143  |    |
| EPHB3        | MAGEF1,LOC101928992 | 3  | FetalAstrocytes                                                                                 | 2  | 0  | 2  | 0  | 0.04061578 | 0.0756772  | 0.003739471 | 0.02437574  |    |
| FAM131A      | MAGEF1,LOC101928992 | 3  | FetalAstrocytes,Neurons                                                                         | 9  | 1  | 7  | 1  | NA         | NA         | 0.02383299  | 0.04874397  |    |
| LOC101928992 | MAGEF1,LOC101928992 | 3  | NA                                                                                              | NA | NA | NA | NA | NA         | NA         | NA          | NA          | NA |
| MAGEF1       | MAGEF1,LOC101928992 | 3  | Neurons*,FetalAstrocytes,MatureAstrocytes,Oligodendrocytes,Endothelial,Microglia/Macrophage     | 6  | 0  | 6  | 0  | NA         | NA         | NA          | NA          | NA |
| POLR2H       | MAGEF1,LOC101928992 | 3  | FetalAstrocytes*,MatureAstrocytes*,Neurons*,Microglia/Macrophage*,Endothelial*,Oligodendrocytes | 1  | 1  | 0  | 0  | NA         | NA         | 0.0381033   | 0.09415976  |    |
| PSMD2        | MAGEF1,LOC101928992 | 3  | FetalAstrocytes,MatureAstrocytes,Neurons,Oligodendrocytes,Microglia/Macrophage,Endothelial      | 1  | 1  | 0  | 0  | NA         | NA         | NA          | NA          | NA |
| SNORD66      | MAGEF1,LOC101928992 | 3  | NA                                                                                              | NA | NA | NA | NA | NA         | NA         | NA          | NA          | NA |
| THPO         | MAGEF1,LOC101928992 | 3  | NA                                                                                              | NA | NA | NA | NA | NA         | NA         | 0.04540571  | 0.1020861   |    |
| TRNA_Asp     | MAGEF1,LOC101928992 | 3  | NA                                                                                              | NA | NA | NA | NA | NA         | NA         | NA          | NA          | NA |
| VPS8         | MAGEF1,LOC101928992 | 3  | Neurons,MatureAstrocytes,Oligodendrocytes,Microglia/Macrophage,FetalAstrocytes,Endothelial      | NA | NA | NA | NA | NA         | NA         | 0.00692571  | 0.03586173  |    |
| VWA5B2       | MAGEF1,LOC101928992 | 3  | NA                                                                                              | 4  | 0  | 4  | 0  | NA         | NA         | NA          | NA          | NA |
| MIR1224      | MAGEF1,LOC101928992 | 3  | NA                                                                                              | NA | NA | NA | NA | NA         | NA         | 0.04368899  | 0.06436506  |    |

|          |                     |    |                                                                                                  |    |    |    |    |             |            |             |            |
|----------|---------------------|----|--------------------------------------------------------------------------------------------------|----|----|----|----|-------------|------------|-------------|------------|
| PARL     | MAGEF1,LOC101928992 | 3  | FetalAstrocytes,MatureAstrocytes,Neurons,Oligodendrocytes,Microglia/Macrophage,Endothelial       | 4  | 3  | 1  | 0  | 0.02424359  | 0.05466969 | 0.0155895   | 0.03082056 |
| ABCC5    | MAGEF1,LOC101928992 | 3  | Neurons*,FetalAstrocytes,MatureAstrocytes,Oligodendrocytes,Microglia/Macrophage                  | 3  | 0  | 3  | 0  | NA          | NA         | 0.003625709 | 0.01287403 |
| MIR4801  | HTN1                | 4  | NA                                                                                               | NA | NA | NA | NA | NA          | NA         | NA          | NA         |
| NWD2     | HTN1                | 4  | Neurons                                                                                          | NA | NA | NA | NA | NA          | NA         | NA          | NA         |
| ARAP2    | HTN1                | 4  | MatureAstrocytes*,Oligodendrocytes*,FetalAstrocytes,Neurons,Microglia/Macrophage                 | 3  | 0  | 3  | 0  | NA          | NA         | 0.002682461 | 0.01363795 |
| DTHD1    | HTN1                | 4  | FetalAstrocytes                                                                                  | NA | NA | NA | NA | NA          | NA         | 0.011436    | 0.0297504  |
| AMTN     | HTN1                | 4  | Microglia/Macrophage                                                                             | NA | NA | NA | NA | NA          | NA         | NA          | NA         |
| C4orf40  | HTN1                | 4  | NA                                                                                               | NA | NA | NA | NA | NA          | NA         | NA          | NA         |
| CABS1    | HTN1                | 4  | NA                                                                                               | NA | NA | NA | NA | NA          | NA         | NA          | NA         |
| CSN1S1   | HTN1                | 4  | NA                                                                                               | 2  | 0  | 1  | 1  | NA          | NA         | 0.02970931  | 0.09818479 |
| CSN1S2AP | HTN1                | 4  | NA                                                                                               | NA | NA | NA | NA | NA          | NA         | NA          | NA         |
| CSN1S2BP | HTN1                | 4  | NA                                                                                               | NA | NA | NA | NA | NA          | NA         | NA          | NA         |
| CSN2     | HTN1                | 4  | NA                                                                                               | NA | NA | NA | NA | NA          | NA         | NA          | NA         |
| CSN3     | HTN1                | 4  | NA                                                                                               | 1  | 0  | 1  | 0  | NA          | NA         | NA          | NA         |
| FDCSP    | HTN1                | 4  | NA                                                                                               | NA | NA | NA | NA | NA          | NA         | NA          | NA         |
| HTN1     | HTN1                | 4  | NA                                                                                               | NA | NA | NA | NA | NA          | NA         | NA          | NA         |
| HTN3     | HTN1                | 4  | NA                                                                                               | NA | NA | NA | NA | NA          | NA         | NA          | NA         |
| MUC7     | HTN1                | 4  | NA                                                                                               | NA | NA | NA | NA | NA          | NA         | 0.006008013 | 0.05867084 |
| ODAM     | HTN1                | 4  | NA                                                                                               | NA | NA | NA | NA | NA          | NA         | NA          | NA         |
| PROL1    | HTN1                | 4  | NA                                                                                               | NA | NA | NA | NA | NA          | NA         | NA          | NA         |
| PRR27    | HTN1                | 4  | NA                                                                                               | NA | NA | NA | NA | NA          | NA         | NA          | NA         |
| SMR3A    | HTN1                | 4  | NA                                                                                               | NA | NA | NA | NA | NA          | NA         | NA          | NA         |
| SMR3B    | HTN1                | 4  | NA                                                                                               | NA | NA | NA | NA | NA          | NA         | NA          | NA         |
| STATH    | HTN1                | 4  | NA                                                                                               | NA | NA | NA | NA | NA          | NA         | NA          | NA         |
| SULT1B1  | HTN1                | 4  | NA                                                                                               | 3  | 0  | 3  | 0  | NA          | NA         | 0.000464812 | 0.0194774  |
| SULT1E1  | HTN1                | 4  | NA                                                                                               | 3  | 0  | 3  | 0  | NA          | NA         | NA          | NA         |
| UGT2A1   | HTN1                | 4  | NA                                                                                               | NA | NA | NA | NA | NA          | NA         | NA          | NA         |
| UGT2A2   | HTN1                | 4  | NA                                                                                               | NA | NA | NA | NA | NA          | NA         | NA          | NA         |
| CRSF1    | HTN1                | 4  | NA                                                                                               | NA | NA | NA | NA | NA          | NA         | NA          | NA         |
| UTP3     | HTN1                | 4  | FetalAstrocytes*,Neurons*,Microglia/Macrophage*,MatureAstrocytes,Oligodendrocytes,Endothelial    | 6  | 0  | 6  | 0  | NA          | NA         | 0.002628832 | 0.03170488 |
| DCK      | HTN1                | 4  | FetalAstrocytes,MatureAstrocytes,Neurons,Oligodendrocytes,Microglia/Macrophage                   | 6  | 0  | 6  | 0  | NA          | NA         | 0.00151667  | 0.01583722 |
| MOB1B    | HTN1                | 4  | Microglia/Macrophage*,FetalAstrocytes,MatureAstrocytes,Neurons,Oligodendrocytes,Endothelial      | 1  | 1  | 0  | 0  | 0.01038139  | 0.04639694 | 0.0113066   | 0.04960198 |
| ATP5B    | HSD17B6,SDR9C7      | 12 | Neurons*,MatureAstrocytes*,Microglia/Macrophage*,Oligodendrocytes*,FetalAstrocytes*,Endothelial* | 15 | 1  | 14 | 0  | NA          | NA         | 0.005917163 | 0.05103623 |
| BAZ2A    | HSD17B6,SDR9C7      | 12 | FetalAstrocytes,MatureAstrocytes,Neurons,Oligodendrocytes,Microglia/Macrophage,Endothelial       | 4  | 0  | 4  | 0  | NA          | NA         | 0.0177892   | 0.06174366 |
| BC059370 | HSD17B6,SDR9C7      | 12 | NA                                                                                               | NA | NA | NA | NA | NA          | NA         | NA          | NA         |
| DQ590166 | HSD17B6,SDR9C7      | 12 | NA                                                                                               | NA | NA | NA | NA | NA          | NA         | NA          | NA         |
| GLS2     | HSD17B6,SDR9C7      | 12 | Neurons                                                                                          | 9  | 0  | 8  | 1  | 0.003593591 | 0.03804135 | 0.02022129  | 0.155425   |
| GPR182   | HSD17B6,SDR9C7      | 12 | NA                                                                                               | NA | NA | NA | NA | NA          | NA         | 0.03018812  | 0.4587216  |
| HSD17B6  | HSD17B6,SDR9C7      | 12 | MatureAstrocytes*,Neurons,Oligodendrocytes                                                       | 5  | 2  | 3  | 0  | NA          | NA         | 0.00167252  | 0.1325787  |
| KIAA1002 | HSD17B6,SDR9C7      | 12 | NA                                                                                               | NA | NA | NA | NA | NA          | NA         | NA          | NA         |
| LRP1     | HSD17B6,SDR9C7      | 12 | MatureAstrocytes,FetalAstrocytes,Microglia/Macrophage,Endothelial                                | 0  | 0  | 0  | 0  | NA          | NA         | 0.03310618  | 0.1454531  |
| MIP      | HSD17B6,SDR9C7      | 12 | NA                                                                                               | NA | NA | NA | NA | NA          | NA         | 0.00222475  | 0.07998036 |
| MIR1228  | HSD17B6,SDR9C7      | 12 | NA                                                                                               | NA | NA | NA | NA | NA          | NA         | NA          | NA         |
| MYO1A    | HSD17B6,SDR9C7      | 12 | NA                                                                                               | NA | NA | NA | NA | NA          | NA         | 0.01856491  | 0.04974075 |
| NAB2     | HSD17B6,SDR9C7      | 12 | Microglia/Macrophage,FetalAstrocytes                                                             | 2  | 2  | 0  | 0  | 0.005663729 | 0.03188447 | 0.0072254   | 0.03216068 |
| NACA     | HSD17B6,SDR9C7      | 12 | Oligodendrocytes*,Microglia/Macrophage*,Neurons*,FetalAstrocytes*,MatureAstrocytes*,Endothelial* | 4  | 1  | 3  | 0  | NA          | NA         | 0.0373797   | 0.4372618  |
| NDUFA4L2 | HSD17B6,SDR9C7      | 12 | Endothelial                                                                                      | 5  | 4  | 1  | 0  | NA          | NA         | NA          | NA         |
| NXP4     | HSD17B6,SDR9C7      | 12 | NA                                                                                               | 3  | 3  | 0  | 0  | NA          | NA         | 0.0131798   | 0.186454   |
| PRIM1    | HSD17B6,SDR9C7      | 12 | FetalAstrocytes,Neurons,Oligodendrocytes,Microglia/Macrophage,MatureAstrocytes                   | NA | NA | NA | NA | NA          | NA         | 0.000173519 | 0.02701317 |
| PTGES3   | HSD17B6,SDR9C7      | 12 | Neurons*,Oligodendrocytes*,Microglia/Macrophage*,FetalAstrocytes*,MatureAstrocytes,Endothelial   | 4  | 1  | 3  | 0  | NA          | NA         | 0.0105087   | 0.03789839 |
| R3HDM2   | HSD17B6,SDR9C7      | 12 | FetalAstrocytes*,MatureAstrocytes,Neurons,Oligodendrocytes,Microglia/Macrophage,Endothelial      | 2  | 2  | 0  | 0  | 0.03188409  | 0.4578529  | 0.02750749  | 0.2142083  |
| RBMS2    | HSD17B6,SDR9C7      | 12 | FetalAstrocytes,MatureAstrocytes,Microglia/Macrophage,Endothelial                                | 1  | 1  | 0  | 0  | NA          | NA         | 0.003147581 | 0.2007427  |
| RDH16    | HSD17B6,SDR9C7      | 12 | NA                                                                                               | NA | NA | NA | NA | 0.0377466   | 0.1503     | 0.003579018 | 0.05337248 |
| SDR9C7   | HSD17B6,SDR9C7      | 12 | NA                                                                                               | NA | NA | NA | NA | NA          | NA         | 0.0143727   | 0.179096   |
| SHMT2    | HSD17B6,SDR9C7      | 12 | FetalAstrocytes,MatureAstrocytes,Neurons,Oligodendrocytes,Endothelial                            | 4  | 4  | 0  | 0  | NA          | NA         | 0.03435319  | 0.1935344  |
| SNORD59A | HSD17B6,SDR9C7      | 12 | NA                                                                                               | NA | NA | NA | NA | NA          | NA         | NA          | NA         |
| SNORD59B | HSD17B6,SDR9C7      | 12 | NA                                                                                               | NA | NA | NA | NA | NA          | NA         | NA          | NA         |
| SPRYD4   | HSD17B6,SDR9C7      | 12 | FetalAstrocytes,MatureAstrocytes,Oligodendrocytes,Microglia/Macrophage                           | 3  | 3  | 0  | 0  | NA          | NA         | 0.0150504   | 0.1424193  |
| STAC3    | HSD17B6,SDR9C7      | 12 | NA                                                                                               | NA | NA | NA | NA | NA          | NA         | 0.008508203 | 0.08124034 |
| STAT6    | HSD17B6,SDR9C7      | 12 | Microglia/Macrophage,Endothelial,MatureAstrocytes                                                | 6  | 2  | 4  | 0  | NA          | NA         | NA          | NA         |
| TAC3     | HSD17B6,SDR9C7      | 12 | Neurons*,Endothelial                                                                             | 4  | 0  | 4  | 0  | NA          | NA         | 0.002849189 | 0.06458654 |
| TIMELESS | HSD17B6,SDR9C7      | 12 | FetalAstrocytes                                                                                  | 2  | 0  | 2  | 0  | NA          | NA         | 0.0136564   | 0.1715554  |

|              |                |    |                                                                                                 |    |    |    |    |           |           |             |             |
|--------------|----------------|----|-------------------------------------------------------------------------------------------------|----|----|----|----|-----------|-----------|-------------|-------------|
| TMEM194A     | HSD17B6,SDR9C7 | 12 | Microglia/Macrophage,FetalAstrocytes,MatureAstrocytes,Neurons,Oligodendrocytes                  | 2  | 1  | 1  | 0  | NA        | NA        | 0.000149217 | 0.01542551  |
| ZBTB39       | HSD17B6,SDR9C7 | 12 | FetalAstrocytes                                                                                 | NA | NA | NA | NA | 0.0422855 | 0.3672971 | 0.0119194   | 0.07581507  |
| LPHN2        | LPHN2          | 1  | Neurons*,FetalAstrocytes,Endothelial                                                            | 3  | 2  | 1  | 0  | NA        | NA        | 0.006424668 | 0.02142006  |
| ADI1         | LINC01250      | 2  | MatureAstrocytes*,FetalAstrocytes,Neurons,Oligodendrocytes,Microglia/Macrophage,Endothelial     | 2  | 1  | 1  | 0  | NA        | NA        | 0.0177489   | 0.05635992  |
| LINC01250    | LINC01250      | 2  | NA                                                                                              | NA | NA | NA | NA | NA        | NA        | NA          | NA          |
| RNASEH1      | LINC01250      | 2  | FetalAstrocytes,MatureAstrocytes,Neurons,Oligodendrocytes,Microglia/Macrophage                  | 4  | 4  | 0  | 0  | NA        | NA        | 0.005677189 | 0.04091087  |
| TRAPPC12     | LINC01250      | 2  | FetalAstrocytes,MatureAstrocytes                                                                | 3  | 0  | 3  | 0  | NA        | NA        | 0.011023    | 0.03879543  |
| TSSC1        | LINC01250      | 2  | Neurons,FetalAstrocytes,MatureAstrocytes                                                        | 3  | 3  | 0  | 0  | NA        | NA        | 0.03781211  | 0.07000966  |
| ALLC         | LINC01250      | 2  | NA                                                                                              | 2  | 0  | 2  | 0  | NA        | NA        | 0.00472295  | 0.03261152  |
| RPS7         | LINC01250      | 2  | FetalAstrocytes*,MatureAstrocytes,Oligodendrocytes,Microglia/Macrophage,Endothelial             | NA | NA | NA | NA | NA        | NA        | 0.002261259 | 0.02001135  |
| ATP6V1C2     | KCNF1,FLJ33534 | 2  | FetalAstrocytes                                                                                 | NA | NA | NA | NA | NA        | NA        | 0.006346192 | 0.02715962  |
| AX746649     | KCNF1,FLJ33534 | 2  | NA                                                                                              | NA | NA | NA | NA | NA        | NA        | NA          | NA          |
| C2orf50      | KCNF1,FLJ33534 | 2  | FetalAstrocytes                                                                                 | 2  | 1  | 1  | 0  | NA        | NA        | 0.0170999   | 0.03847193  |
| E2F6         | KCNF1,FLJ33534 | 2  | MatureAstrocytes*,FetalAstrocytes,Neurons,Oligodendrocytes,Microglia/Macrophage                 | 1  | 1  | 0  | 0  | NA        | NA        | 0.000629197 | 0.008209331 |
| FLJ33534     | KCNF1,FLJ33534 | 2  | NA                                                                                              | 3  | 2  | 0  | 1  | NA        | NA        | NA          | NA          |
| KCNF1        | KCNF1,FLJ33534 | 2  | NA                                                                                              | 10 | 0  | 10 | 0  | NA        | NA        | 0.008151703 | 0.05394396  |
| LINC00570    | KCNF1,FLJ33534 | 2  | NA                                                                                              | NA | NA | NA | NA | NA        | NA        | NA          | NA          |
| LOC101929733 | KCNF1,FLJ33534 | 2  | NA                                                                                              | NA | NA | NA | NA | NA        | NA        | NA          | NA          |
| NOL10        | KCNF1,FLJ33534 | 2  | FetalAstrocytes,MatureAstrocytes,Neurons,Oligodendrocytes,Microglia/Macrophage,Endothelial      | NA | NA | NA | NA | NA        | NA        | 0.003228419 | 0.0203919   |
| PDIA6        | KCNF1,FLJ33534 | 2  | Neurons*,MatureAstrocytes*,FetalAstrocytes*,Oligodendrocytes*,Microglia/Macrophage*,Endothelial | 7  | 5  | 2  | 0  | NA        | NA        | 0.03240921  | 0.06292947  |
| PQLC3        | KCNF1,FLJ33534 | 2  | Microglia/Macrophage,Endothelial,Oligodendrocytes,MatureAstrocytes,FetalAstrocytes,Neurons      | 0  | 0  | 0  | 0  | NA        | NA        | 0.0234169   | 0.05759389  |
| ROCK2        | KCNF1,FLJ33534 | 2  | Neurons*,FetalAstrocytes*,Microglia/Macrophage,MatureAstrocytes,Endothelial,Oligodendrocytes    | 7  | 2  | 5  | 0  | NA        | NA        | 0.00831231  | 0.02576358  |
| CYS1         | KCNF1,FLJ33534 | 2  | NA                                                                                              | 3  | 0  | 3  | 0  | NA        | NA        | 0.02816689  | 0.05212099  |
| PRM2         | KCNF1,FLJ33534 | 2  | NA                                                                                              | NA | NA | NA | NA | NA        | NA        | NA          | NA          |
| NTS2R        | KCNF1,FLJ33534 | 2  | NA                                                                                              | NA | NA | NA | NA | NA        | NA        | NA          | NA          |
| GREB1        | KCNF1,FLJ33534 | 2  | MatureAstrocytes,Neurons                                                                        | 4  | 3  | 1  | 0  | NA        | NA        | 0.013131    | 0.03305501  |

| Gene        | Locus | Chr | Pathway                                                                                                                                                                                                                                                                                                                                                                                                                                                                                                                                                                                                                                                                                                                                                   | Non-APOE locus pathway |
|-------------|-------|-----|-----------------------------------------------------------------------------------------------------------------------------------------------------------------------------------------------------------------------------------------------------------------------------------------------------------------------------------------------------------------------------------------------------------------------------------------------------------------------------------------------------------------------------------------------------------------------------------------------------------------------------------------------------------------------------------------------------------------------------------------------------------|------------------------|
| APOC1       | APOE  | 19  | GO_NEGATIVE_REGULATION_OF_LIPID_METABOLIC_PROCESS<br>GO_ORGANOPHOSPHATE_ESTER_TRANSPORT<br>GO_REGULATION_OF_RECEPTOR_MEDIATED_ENDOCYTOSIS<br>GO_NEGATIVE_REGULATION_OF_LIPID_TRANSPORT<br>GO_PHOSPHOLIPID_TRANSPORT<br>GO_NEGATIVE_REGULATION_OF_STEROL_TRANSPORT<br>GO_PHOSPHOLIPID_EFFLUX                                                                                                                                                                                                                                                                                                                                                                                                                                                               | NA                     |
| APOC1P1     | APOE  | 19  | NA                                                                                                                                                                                                                                                                                                                                                                                                                                                                                                                                                                                                                                                                                                                                                        | NA                     |
| APOC2       | APOE  | 19  | GO_NEGATIVE_REGULATION_OF_LIPID_METABOLIC_PROCESS<br>GO_ORGANOPHOSPHATE_ESTER_TRANSPORT<br>GO_REGULATION_OF_RECEPTOR_MEDIATED_ENDOCYTOSIS<br>GO_NEGATIVE_REGULATION_OF_LIPID_TRANSPORT<br>GO_PHOSPHOLIPID_TRANSPORT<br>GO_NEGATIVE_REGULATION_OF_STEROL_TRANSPORT<br>GO_PHOSPHOLIPID_EFFLUX                                                                                                                                                                                                                                                                                                                                                                                                                                                               | NA                     |
| APOC4       | APOE  | 19  | NA                                                                                                                                                                                                                                                                                                                                                                                                                                                                                                                                                                                                                                                                                                                                                        | NA                     |
| APOC4-APOC2 | APOE  | 19  | NA                                                                                                                                                                                                                                                                                                                                                                                                                                                                                                                                                                                                                                                                                                                                                        | NA                     |
| APOE        | APOE  | 19  | GO_NEGATIVE_REGULATION_OF_LIPID_METABOLIC_PROCESS<br>GO_REGULATION_OF_DEVELOPMENTAL_GROWTH<br>GO_REGULATION_OF_CELL_MORPHOGENESIS_INVOLVED_IN_DIFFERENTIATION<br>GO_MODULATION_BY_HOST_OF_VIRAL_PROCESS<br>GO_REGULATION_OF_GROWTH<br>GO_ORGANOPHOSPHATE_ESTER_TRANSPORT<br>GO_ORGANIC_HYDROXY_COMPOUND_CATABOLIC_PROCESS<br>GO_MAINTENANCE_OF_LOCATION_IN_CELL<br>GO_REGULATION_OF_CELL_GROWTH<br>GO_NEGATIVE_REGULATION_OF_LIPID_TRANSPORT<br>GO_PHOSPHOLIPID_TRANSPORT<br>GO_POSITIVE_REGULATION_OF_PROTEOLYSIS<br>GO_NEGATIVE_REGULATION_OF_STEROL_TRANSPORT<br>GO_REGULATION_OF_EXTENT_OF_CELL_GROWTH<br>GO_REGULATION_OF_PROTEOLYSIS<br>GO_PHOSPHOLIPID_EFFLUX<br>GO_ALCOHOL_CATABOLIC_PROCESS<br>GO_RECEPTOR_CLUSTERING<br>GO_BETA_AMYLOID_BINDING | NA                     |
| BCAM        | APOE  | 19  | NA                                                                                                                                                                                                                                                                                                                                                                                                                                                                                                                                                                                                                                                                                                                                                        | NA                     |
| BCL3        | APOE  | 19  | GO_MAINTENANCE_OF_LOCATION_IN_CELL<br>GO_SIGNAL_TRANSDUCTION_IN_RESPONSE_TO_DNA_DAMAGE<br>GO_RESPONSE_TO_PROTOZOAN<br>GO_REGULATION_OF_INTRACELLULAR_PROTEIN_TRANSPORT<br>GO_REGULATION_OF_PROTEIN_TARGETING                                                                                                                                                                                                                                                                                                                                                                                                                                                                                                                                              | NA                     |
| BLOC1S3     | APOE  | 19  | GO_SYNAPTIC_VESICLE_LOCALIZATION<br>GO_VESICLE_LOCALIZATION<br>GO_CYTOSOLIC_TRANSPORT                                                                                                                                                                                                                                                                                                                                                                                                                                                                                                                                                                                                                                                                     | NA                     |
| CBLC        | APOE  | 19  | GO_REGULATION_OF_PROTEIN_TYROSINE_KINASE_ACTIVITY                                                                                                                                                                                                                                                                                                                                                                                                                                                                                                                                                                                                                                                                                                         | NA                     |
| CD3EAP      | APOE  | 19  | NA                                                                                                                                                                                                                                                                                                                                                                                                                                                                                                                                                                                                                                                                                                                                                        | NA                     |
| CEACAM16    | APOE  | 19  | GO_ACTIN_BASED_CELL_PROJECTION                                                                                                                                                                                                                                                                                                                                                                                                                                                                                                                                                                                                                                                                                                                            | NA                     |
| CEACAM19    | APOE  | 19  | NA                                                                                                                                                                                                                                                                                                                                                                                                                                                                                                                                                                                                                                                                                                                                                        | NA                     |
| CEACAM20    | APOE  | 19  | NA                                                                                                                                                                                                                                                                                                                                                                                                                                                                                                                                                                                                                                                                                                                                                        | NA                     |
| CEACAM22P   | APOE  | 19  | NA                                                                                                                                                                                                                                                                                                                                                                                                                                                                                                                                                                                                                                                                                                                                                        | NA                     |
| CKM         | APOE  | 19  | NA                                                                                                                                                                                                                                                                                                                                                                                                                                                                                                                                                                                                                                                                                                                                                        | NA                     |
| CLASRP      | APOE  | 19  | NA                                                                                                                                                                                                                                                                                                                                                                                                                                                                                                                                                                                                                                                                                                                                                        | NA                     |
| CLPTM1      | APOE  | 19  | NA                                                                                                                                                                                                                                                                                                                                                                                                                                                                                                                                                                                                                                                                                                                                                        | NA                     |
| ERCC1       | APOE  | 19  | GO_GROWTH<br>GO_CELL_AGING<br>GO_DEVELOPMENTAL_GROWTH                                                                                                                                                                                                                                                                                                                                                                                                                                                                                                                                                                                                                                                                                                     | NA                     |
| ERCC2       | APOE  | 19  | GO_EPITHELIUM_DEVELOPMENT<br>GO_GROWTH<br>GO_DEVELOPMENTAL_GROWTH<br>GO_METAL_CLUSTER_BINDING<br>GO_4_IRON_4_SULFUR_CLUSTER_BINDING                                                                                                                                                                                                                                                                                                                                                                                                                                                                                                                                                                                                                       | NA                     |
| EXOC3L2     | APOE  | 19  | NA                                                                                                                                                                                                                                                                                                                                                                                                                                                                                                                                                                                                                                                                                                                                                        | NA                     |
| GEMIN7      | APOE  | 19  | NA                                                                                                                                                                                                                                                                                                                                                                                                                                                                                                                                                                                                                                                                                                                                                        | NA                     |
| IGSF23      | APOE  | 19  | NA                                                                                                                                                                                                                                                                                                                                                                                                                                                                                                                                                                                                                                                                                                                                                        | NA                     |
| KLC3        | APOE  | 19  | NA                                                                                                                                                                                                                                                                                                                                                                                                                                                                                                                                                                                                                                                                                                                                                        | NA                     |
| MARK4       | APOE  | 19  | NA                                                                                                                                                                                                                                                                                                                                                                                                                                                                                                                                                                                                                                                                                                                                                        | NA                     |
| MIR4531     | APOE  | 19  | NA                                                                                                                                                                                                                                                                                                                                                                                                                                                                                                                                                                                                                                                                                                                                                        | NA                     |

|                  |                |    |                                                                                                                                                                                                                                                                                                                                                                                                                                                                                                                |                                                                                                                                                                                                                                                                                                                                                                                                                                       |
|------------------|----------------|----|----------------------------------------------------------------------------------------------------------------------------------------------------------------------------------------------------------------------------------------------------------------------------------------------------------------------------------------------------------------------------------------------------------------------------------------------------------------------------------------------------------------|---------------------------------------------------------------------------------------------------------------------------------------------------------------------------------------------------------------------------------------------------------------------------------------------------------------------------------------------------------------------------------------------------------------------------------------|
| MIR8085          | APOE           | 19 | NA                                                                                                                                                                                                                                                                                                                                                                                                                                                                                                             | NA                                                                                                                                                                                                                                                                                                                                                                                                                                    |
| NKPD1            | APOE           | 19 | NA                                                                                                                                                                                                                                                                                                                                                                                                                                                                                                             | NA                                                                                                                                                                                                                                                                                                                                                                                                                                    |
| PPP1R13L         | APOE           | 19 | GO_HEART_MORPHOGENESIS<br>GO_GROWTH<br>GO_DEVELOPMENTAL_GROWTH                                                                                                                                                                                                                                                                                                                                                                                                                                                 | NA                                                                                                                                                                                                                                                                                                                                                                                                                                    |
| PPP1R37          | APOE           | 19 | NA                                                                                                                                                                                                                                                                                                                                                                                                                                                                                                             | NA                                                                                                                                                                                                                                                                                                                                                                                                                                    |
| PVR              | APOE           | 19 | NA                                                                                                                                                                                                                                                                                                                                                                                                                                                                                                             | NA                                                                                                                                                                                                                                                                                                                                                                                                                                    |
| PVRL2            | APOE           | 19 | GO_MITOCHONDRION_ORGANIZATION<br>GO_MITOCHONDRION_LOCALIZATION                                                                                                                                                                                                                                                                                                                                                                                                                                                 | NA                                                                                                                                                                                                                                                                                                                                                                                                                                    |
| REL8             | APOE           | 19 | NA                                                                                                                                                                                                                                                                                                                                                                                                                                                                                                             | NA                                                                                                                                                                                                                                                                                                                                                                                                                                    |
| TOMM40           | APOE           | 19 | GO_MITOCHONDRION_ORGANIZATION<br>GO_INTRINSIC_COMPONENT_OF_ORGANELLE_MEMBRANE<br>GO_PORE_COMPLEX<br>GO_MITOCHONDRIAL_MEMBRANE_PART                                                                                                                                                                                                                                                                                                                                                                             | NA                                                                                                                                                                                                                                                                                                                                                                                                                                    |
| TRAPPC6A         | APOE           | 19 | GO_VESICLE_LOCALIZATION                                                                                                                                                                                                                                                                                                                                                                                                                                                                                        | NA                                                                                                                                                                                                                                                                                                                                                                                                                                    |
| ZNF180           | APOE           | 19 | NA                                                                                                                                                                                                                                                                                                                                                                                                                                                                                                             | NA                                                                                                                                                                                                                                                                                                                                                                                                                                    |
| ZNF229           | APOE           | 19 | NA                                                                                                                                                                                                                                                                                                                                                                                                                                                                                                             | NA                                                                                                                                                                                                                                                                                                                                                                                                                                    |
| ZNF296           | APOE           | 19 | NA                                                                                                                                                                                                                                                                                                                                                                                                                                                                                                             | NA                                                                                                                                                                                                                                                                                                                                                                                                                                    |
| ADCY8            | ADCY8, EFR3A   | 8  | GO_ADENYLATE_CYCLASE_ACTIVATING_G_PROTEIN_COUPLED_RECEPTOR_SIGNALING_PATHWAY                                                                                                                                                                                                                                                                                                                                                                                                                                   | GO_ADENYLATE_CYCLASE_ACTIVATING_G_PROTEIN_COUPLED_RECEPTOR_SIGNALING_PATHWAY                                                                                                                                                                                                                                                                                                                                                          |
| EFR3A            | ADCY8, EFR3A   | 8  | NA                                                                                                                                                                                                                                                                                                                                                                                                                                                                                                             | NA                                                                                                                                                                                                                                                                                                                                                                                                                                    |
| 7SK              | ADCY8, EFR3A   | 8  | NA                                                                                                                                                                                                                                                                                                                                                                                                                                                                                                             | NA                                                                                                                                                                                                                                                                                                                                                                                                                                    |
| RAP2B            | RAP2B, C3orf79 | 3  | GO_REGULATION_OF_PROTEIN_TYROSINE_KINASE_ACTIVITY<br>GO_EPITHELIUM_DEVELOPMENT<br>GO_SMALL_GTPASE_MEDIATED_SIGNAL_TRANSDUCTION<br>GO_GDP_BINDING                                                                                                                                                                                                                                                                                                                                                               | GO_SMALL_GTPASE_MEDIATED_SIGNAL_TRANSDUCTION                                                                                                                                                                                                                                                                                                                                                                                          |
| C3orf79          | RAP2B, C3orf79 | 3  | NA                                                                                                                                                                                                                                                                                                                                                                                                                                                                                                             | NA                                                                                                                                                                                                                                                                                                                                                                                                                                    |
| AK092619ARHGFE26 | RAP2B, C3orf79 | 3  | NA                                                                                                                                                                                                                                                                                                                                                                                                                                                                                                             | NA                                                                                                                                                                                                                                                                                                                                                                                                                                    |
| ARHGFE26-AS1     | RAP2B, C3orf79 | 3  | NA                                                                                                                                                                                                                                                                                                                                                                                                                                                                                                             | NA                                                                                                                                                                                                                                                                                                                                                                                                                                    |
| DHX36            | RAP2B, C3orf79 | 3  | NA                                                                                                                                                                                                                                                                                                                                                                                                                                                                                                             | NA                                                                                                                                                                                                                                                                                                                                                                                                                                    |
| AK091624         | DAPK2          | 15 | NA                                                                                                                                                                                                                                                                                                                                                                                                                                                                                                             | NA                                                                                                                                                                                                                                                                                                                                                                                                                                    |
| AL137522         | DAPK2          | 15 | NA                                                                                                                                                                                                                                                                                                                                                                                                                                                                                                             | NA                                                                                                                                                                                                                                                                                                                                                                                                                                    |
| CSNK1G1          | DAPK2          | 15 | GO_PROTEIN_AUTOPHOSPHORYLATION                                                                                                                                                                                                                                                                                                                                                                                                                                                                                 | GO_PROTEIN_AUTOPHOSPHORYLATION                                                                                                                                                                                                                                                                                                                                                                                                        |
| DAPK2            | DAPK2          | 15 | GO_PROTEIN_AUTOPHOSPHORYLATION<br>GO_REGULATION_OF_INTRINSIC_APOPTOTIC_SIGNALING_PATHWAY<br>GO_REGULATION_OF_APOPTOTIC_SIGNALING_PATHWAY                                                                                                                                                                                                                                                                                                                                                                       | GO_PROTEIN_AUTOPHOSPHORYLATION                                                                                                                                                                                                                                                                                                                                                                                                        |
| FAM96A           | DAPK2          | 15 | NA                                                                                                                                                                                                                                                                                                                                                                                                                                                                                                             | NA                                                                                                                                                                                                                                                                                                                                                                                                                                    |
| FBXL22           | DAPK2          | 15 | NA                                                                                                                                                                                                                                                                                                                                                                                                                                                                                                             | NA                                                                                                                                                                                                                                                                                                                                                                                                                                    |
| HERC1            | DAPK2          | 15 | NA                                                                                                                                                                                                                                                                                                                                                                                                                                                                                                             | NA                                                                                                                                                                                                                                                                                                                                                                                                                                    |
| KIAA0101         | DAPK2          | 15 | NA                                                                                                                                                                                                                                                                                                                                                                                                                                                                                                             | NA                                                                                                                                                                                                                                                                                                                                                                                                                                    |
| LOC101928988     | DAPK2          | 15 | NA                                                                                                                                                                                                                                                                                                                                                                                                                                                                                                             | NA                                                                                                                                                                                                                                                                                                                                                                                                                                    |
| Mir_422          | DAPK2          | 15 | NA                                                                                                                                                                                                                                                                                                                                                                                                                                                                                                             | NA                                                                                                                                                                                                                                                                                                                                                                                                                                    |
| PPIB             | DAPK2          | 15 | GO_REGULATION_OF_DEVELOPMENTAL_GROWTH<br>GO_MODULATION_BY_HOST_OF_VIRAL_PROCESS<br>GO_REGULATION_OF_GROWTH                                                                                                                                                                                                                                                                                                                                                                                                     | NA                                                                                                                                                                                                                                                                                                                                                                                                                                    |
| SNX1             | DAPK2          | 15 | GO_PROTEIN_LOCALIZATION_TO_CYTOSKELETON<br>GO_PROTEIN_LOCALIZATION_TO_CENTROSOME<br>GO_ORGANIC_HYDROXY_COMPOUND_CATABOLIC_PROCESS<br>GO_NEGATIVE_REGULATION_OF_ESTABLISHMENT_OF_PROTEIN_LOCALIZATION<br>GO_REGULATION_OF_PROTEOLYSIS<br>GO_ALCOHOL_CATABOLIC_PROCESS<br>GO_CYTOSOLIC_TRANSPORT<br>GO_EXTRINSIC_COMPONENT_OF_PLASMA_MEMBRANE                                                                                                                                                                    | NA                                                                                                                                                                                                                                                                                                                                                                                                                                    |
| SNX22            | DAPK2          | 15 | NA                                                                                                                                                                                                                                                                                                                                                                                                                                                                                                             | NA                                                                                                                                                                                                                                                                                                                                                                                                                                    |
| TRIP4            | DAPK2          | 15 | GO_TRANSCRIPTION_COACTIVATOR_ACTIVITY                                                                                                                                                                                                                                                                                                                                                                                                                                                                          | GO_TRANSCRIPTION_COACTIVATOR_ACTIVITY                                                                                                                                                                                                                                                                                                                                                                                                 |
| USP3             | DAPK2          | 15 | GO_CHROMATIN_MODIFICATION                                                                                                                                                                                                                                                                                                                                                                                                                                                                                      | GO_CHROMATIN_MODIFICATION                                                                                                                                                                                                                                                                                                                                                                                                             |
| USP3-AS1         | DAPK2          | 15 | NA                                                                                                                                                                                                                                                                                                                                                                                                                                                                                                             | NA                                                                                                                                                                                                                                                                                                                                                                                                                                    |
| LACTB            | DAPK2          | 15 | NA                                                                                                                                                                                                                                                                                                                                                                                                                                                                                                             | NA                                                                                                                                                                                                                                                                                                                                                                                                                                    |
| RPS27L           | DAPK2          | 15 | GO_G1_DNA_DAMAGE_CHECKPOINT<br>GO_POSITIVE_REGULATION_OF_PEPTIDASE_ACTIVITY<br>GO_MITOTIC_DNA_INTEGRITY_CHECKPOINT<br>GO_MITOTIC_CELL_CYCLE_CHECKPOINT<br>GO_NEGATIVE_REGULATION_OF_CELL_CYCLE_PHASE_TRANSITION<br>GO_NEGATIVE_REGULATION_OF_CELL_CYCLE_G1_S_PHASE_TRANSITION<br>GO_REGULATION_OF_CYSSTEINE_TYPE_ENDOPEPTIDASE_ACTIVITY<br>GO_POSITIVE_REGULATION_OF_PROTEOLYSIS<br>GO_DNA_INTEGRITY_CHECKPOINT<br>GO_CELL_CYCLE_CHECKPOINT<br>GO_REGULATION_OF_PROTEOLYSIS<br>GO_PEPTIDASE_ACTIVATOR_ACTIVITY | GO_G1_DNA_DAMAGE_CHECKPOINT<br>GO_POSITIVE_REGULATION_OF_PEPTIDASE_ACTIVITY<br>GO_MITOTIC_DNA_INTEGRITY_CHECKPOINT<br>GO_MITOTIC_CELL_CYCLE_CHECKPOINT<br>GO_NEGATIVE_REGULATION_OF_CELL_CYCLE_PHASE_TRANSITION<br>GO_NEGATIVE_REGULATION_OF_CELL_CYCLE_G1_S_PHASE_TRANSITION<br>GO_REGULATION_OF_CYSSTEINE_TYPE_ENDOPEPTIDASE_ACTIVITY<br>GO_DNA_INTEGRITY_CHECKPOINT<br>GO_CELL_CYCLE_CHECKPOINT<br>GO_PEPTIDASE_ACTIVATOR_ACTIVITY |

|            |                 |    |                                                                                       |                                                                 |
|------------|-----------------|----|---------------------------------------------------------------------------------------|-----------------------------------------------------------------|
| RAB8B      | DAPK2           | 15 | GO_SMALL_GTPASE_MEDIATED_SIGNAL_TRANSDUCTION                                          | GO_SMALL_GTPASE_MEDIATED_SIGNAL_TRANSDUCTION                    |
|            |                 |    | GO_GTPASE_ACTIVITY                                                                    | GO_GTPASE_ACTIVITY                                              |
|            |                 |    | GO_GDP_BINDING                                                                        | GO_GDP_BINDING                                                  |
| ZNF609     | DAPK2           | 15 | NA                                                                                    | NA                                                              |
| PLEKHO2    | DAPK2           | 15 | NA                                                                                    | NA                                                              |
| ANKDD1A    | DAPK2           | 15 | NA                                                                                    | NA                                                              |
| CYP4V2     | CYP4V2          | 4  | GO_OXIDOREDUCTASE_ACTIVITY                                                            | GO_OXIDOREDUCTASE_ACTIVITY                                      |
| F11        | CYP4V2          | 4  | NA                                                                                    | NA                                                              |
| F11-AS1    | CYP4V2          | 4  | NA                                                                                    | NA                                                              |
| FAM149A    | CYP4V2          | 4  | NA                                                                                    | NA                                                              |
| FAT1       | CYP4V2          | 4  | GO_ACTIN_BASED_CELL_PROJECTION                                                        | NA                                                              |
| FLJ38576   | CYP4V2          | 4  | NA                                                                                    | NA                                                              |
| KLKB1      | CYP4V2          | 4  | GO_POSITIVE_REGULATION_OF_PROTEOLYSIS                                                 | NA                                                              |
|            |                 |    | GO_REGULATION_OF_PROTEOLYSIS                                                          |                                                                 |
| LOC285441  | CYP4V2          | 4  | NA                                                                                    | NA                                                              |
| MTNR1A     | CYP4V2          | 4  | GO_NEGATIVE_REGULATION_OF_ESTABLISHMENT_OF_PROTEIN_LOCALIZATION                       | GO_NEGATIVE_REGULATION_OF_ESTABLISHMENT_OF_PROTEIN_LOCALIZATION |
| SORSB2     | CYP4V2          | 4  | GO_CARDIAC_MUSCLE_CELL_DIFFERENTIATION                                                | GO_CARDIAC_MUSCLE_CELL_DIFFERENTIATION                          |
|            |                 |    | GO_GROWTH                                                                             |                                                                 |
|            |                 |    | GO_CARDIOCYTE_DIFFERENTIATION                                                         |                                                                 |
|            |                 |    | GO_DEVELOPMENTAL_CELL_GROWTH                                                          |                                                                 |
|            |                 |    | GO_DEVELOPMENTAL_GROWTH                                                               |                                                                 |
| TLR3       | CYP4V2          | 4  | GO_EXTRINSIC_APOPTOTIC_SIGNALING_PATHWAY                                              | GO_EXTRINSIC_APOPTOTIC_SIGNALING_PATHWAY                        |
|            |                 |    | GO_RESPONSE_TO_INTERFERON_BETA                                                        |                                                                 |
|            |                 |    | GO_POSITIVE_REGULATION_OF_NF_KAPPAB_TRANSCRIPTION_FACTOR_ACTIVITY                     |                                                                 |
|            |                 |    | GO_REGULATION_OF_INTRACELLULAR_PROTEIN_TRANSPORT                                      |                                                                 |
|            |                 |    | GO_POSITIVE_REGULATION_OF_SEQUENCE_SPECIFIC_DNA_BINDING_TRANSCRIPTION_FACTOR_ACTIVITY |                                                                 |
|            |                 |    | GO_CELLULAR_RESPONSE_TO_DSRNA                                                         |                                                                 |
|            |                 |    | GO_REGULATION_OF_SEQUENCE_SPECIFIC_DNA_BINDING_TRANSCRIPTION_FACTOR_ACTIVITY          |                                                                 |
|            |                 |    | GO_CELLULAR_RESPONSE_TO_INTERFERON_BETA                                               |                                                                 |
|            |                 |    | GO_REGULATION_OF_PROTEIN_TARGETING                                                    |                                                                 |
| U4         | CYP4V2          | 4  | NA                                                                                    | NA                                                              |
| U6         | CYP4V2          | 4  | NA                                                                                    | NA                                                              |
| UNQ2560    | CYP4V2          | 4  | NA                                                                                    | NA                                                              |
| C4orf47    | CYP4V2          | 4  | NA                                                                                    | NA                                                              |
| AGPAT3     | C21orf33,ICOSLG | 21 | NA                                                                                    | NA                                                              |
| AIRE       | C21orf33,ICOSLG | 21 | NA                                                                                    | NA                                                              |
| C21orf2    | C21orf33,ICOSLG | 21 | NA                                                                                    | NA                                                              |
| C21orf33   | C21orf33,ICOSLG | 21 | NA                                                                                    | NA                                                              |
| C21orf90   | C21orf33,ICOSLG | 21 | NA                                                                                    | NA                                                              |
| CSTB       | C21orf33,ICOSLG | 21 | GO_REGULATION_OF_PROTEOLYSIS                                                          | NA                                                              |
| DNMT3L     | C21orf33,ICOSLG | 21 | NA                                                                                    | NA                                                              |
| DQ588725   | C21orf33,ICOSLG | 21 | NA                                                                                    | NA                                                              |
| DQ590668   | C21orf33,ICOSLG | 21 | NA                                                                                    | NA                                                              |
| DQ598454   | C21orf33,ICOSLG | 21 | NA                                                                                    | NA                                                              |
| DQ599834   | C21orf33,ICOSLG | 21 | NA                                                                                    | NA                                                              |
| DQ601137   | C21orf33,ICOSLG | 21 | NA                                                                                    | NA                                                              |
| ICOSLG     | C21orf33,ICOSLG | 21 | KEGG_INTESTINAL_IMMUNE_NETWORK_FOR_IGA_PRODUCTION                                     | KEGG_INTESTINAL_IMMUNE_NETWORK_FOR_IGA_PRODUCTION               |
| KRTAP10-1  | C21orf33,ICOSLG | 21 | NA                                                                                    | NA                                                              |
| KRTAP10-10 | C21orf33,ICOSLG | 21 | NA                                                                                    | NA                                                              |
| KRTAP10-11 | C21orf33,ICOSLG | 21 | NA                                                                                    | NA                                                              |
| KRTAP10-12 | C21orf33,ICOSLG | 21 | NA                                                                                    | NA                                                              |
| KRTAP10-2  | C21orf33,ICOSLG | 21 | NA                                                                                    | NA                                                              |
| KRTAP10-3  | C21orf33,ICOSLG | 21 | NA                                                                                    | NA                                                              |
| KRTAP10-4  | C21orf33,ICOSLG | 21 | NA                                                                                    | NA                                                              |
| KRTAP10-5  | C21orf33,ICOSLG | 21 | NA                                                                                    | NA                                                              |
| KRTAP10-6  | C21orf33,ICOSLG | 21 | NA                                                                                    | NA                                                              |
| KRTAP10-7  | C21orf33,ICOSLG | 21 | NA                                                                                    | NA                                                              |
| KRTAP10-8  | C21orf33,ICOSLG | 21 | NA                                                                                    | NA                                                              |
| KRTAP10-9  | C21orf33,ICOSLG | 21 | NA                                                                                    | NA                                                              |
| KRTAP12-1  | C21orf33,ICOSLG | 21 | NA                                                                                    | NA                                                              |
| KRTAP12-2  | C21orf33,ICOSLG | 21 | NA                                                                                    | NA                                                              |
| KRTAP12-3  | C21orf33,ICOSLG | 21 | NA                                                                                    | NA                                                              |
| KRTAP12-4  | C21orf33,ICOSLG | 21 | NA                                                                                    | NA                                                              |
| LOC284837  | C21orf33,ICOSLG | 21 | NA                                                                                    | NA                                                              |
| LRRC3      | C21orf33,ICOSLG | 21 | NA                                                                                    | NA                                                              |
| LRRC3-AS1  | C21orf33,ICOSLG | 21 | NA                                                                                    | NA                                                              |
| PDXK       | C21orf33,ICOSLG | 21 | NA                                                                                    | NA                                                              |
| PFKL       | C21orf33,ICOSLG | 21 | GO_PROTEIN_HOMOTETRAMERIZATION                                                        | GO_PROTEIN_HOMOTETRAMERIZATION                                  |
|            |                 |    | GO_NAD_METABOLIC_PROCESS                                                              |                                                                 |



|              |                    |    |                                                                 |                                                                 |
|--------------|--------------------|----|-----------------------------------------------------------------|-----------------------------------------------------------------|
|              |                    |    | GO_NEGATIVE_REGULATION_OF_ESTABLISHMENT_OF_PROTEIN_LOCALIZATION |                                                                 |
|              |                    |    | GO_NUCLEOSIDE_TRIPHOSPHATE_METABOLIC_PROCESS                    |                                                                 |
|              |                    |    | GO_NADH_METABOLIC_PROCESS                                       |                                                                 |
|              |                    |    | GO_PROTEIN_HOMOOLIGOMERIZATION                                  |                                                                 |
|              |                    |    | GO_GLUCOSE_CATABOLIC_PROCESS                                    |                                                                 |
|              |                    |    | KEGG_GLYCOLYSIS_GLUconeogenesis                                 |                                                                 |
|              |                    |    | Biocarta_GLYCOLYSIS_PATHWAY                                     |                                                                 |
| PWP2         | C21orf33,ICOSLG    | 21 | NA                                                              | NA                                                              |
| RRP1         | C21orf33,ICOSLG    | 21 | NA                                                              | NA                                                              |
| TRAPPC10     | C21orf33,ICOSLG    | 21 | GO_VESICLE_LOCALIZATION                                         | NA                                                              |
|              |                    |    | GO_CYTOSOLIC_TRANSPORT                                          |                                                                 |
| TRPM2        | C21orf33,ICOSLG    | 21 | NA                                                              | NA                                                              |
| TRPM2-AS     | C21orf33,ICOSLG    | 21 | NA                                                              | NA                                                              |
| TSPEAR       | C21orf33,ICOSLG    | 21 | GO_ACTIN_BASED_CELL_PROJECTION                                  | NA                                                              |
| TSPEAR-AS1   | C21orf33,ICOSLG    | 21 | NA                                                              | NA                                                              |
| HSF2BP       | C21orf33,ICOSLG    | 21 | GO_MITOCHONDRION_ORGANIZATION                                   | NA                                                              |
| RRP1B        | C21orf33,ICOSLG    | 21 | NA                                                              | NA                                                              |
| UBE2G2       | C21orf33,ICOSLG    | 21 | GO_RESPONSE_TO_INTERFERON_BETA                                  | GO_RESPONSE_TO_INTERFERON_BETA                                  |
|              |                    |    | GO_NEGATIVE_REGULATION_OF_INTRACELLULAR_PROTEIN_TRANSPORT       | GO_NEGATIVE_REGULATION_OF_INTRACELLULAR_PROTEIN_TRANSPORT       |
|              |                    |    | GO_NEGATIVE_REGULATION_OF_ESTABLISHMENT_OF_PROTEIN_LOCALIZATION | GO_NEGATIVE_REGULATION_OF_ESTABLISHMENT_OF_PROTEIN_LOCALIZATION |
|              |                    |    | GO_REGULATION_OF_INTRACELLULAR_PROTEIN_TRANSPORT                | GO_CELLULAR_RESPONSE_TO_INTERFERON_BETA                         |
|              |                    |    | GO_CELLULAR_RESPONSE_TO_INTERFERON_BETA                         | KEGG_PARKINSONS_DISEASE                                         |
| C21orf67     | C21orf33,ICOSLG    | 21 | NA                                                              | NA                                                              |
| LINC00971    | LINC00971          | 3  | NA                                                              | NA                                                              |
| CADM2        | LINC00971          | 3  | NA                                                              | NA                                                              |
| SLITRK1      | SLITRK1            | 13 | GO_NEURON_PROJECTION_MORPHOGENESIS                              | GO_NEURON_PROJECTION_MORPHOGENESIS                              |
|              |                    |    | GO_GROWTH                                                       |                                                                 |
|              |                    |    | GO_DEVELOPMENTAL_GROWTH                                         |                                                                 |
| LINC00333    | SLITRK1            | 13 | NA                                                              | NA                                                              |
| C2orf80      | C2orf80,IDH1       | 2  | NA                                                              | NA                                                              |
| CCNYL1       | C2orf80,IDH1       | 2  | NA                                                              | NA                                                              |
| CRYGA        | C2orf80,IDH1       | 2  | NA                                                              | NA                                                              |
| CRYGB        | C2orf80,IDH1       | 2  | GO_EPITHELIUM_DEVELOPMENT                                       | NA                                                              |
| CRYGC        | C2orf80,IDH1       | 2  | NA                                                              | NA                                                              |
| CRYGD        | C2orf80,IDH1       | 2  | GO_EPITHELIUM_DEVELOPMENT                                       | NA                                                              |
| FZD5         | C2orf80,IDH1       | 2  | GO_EPITHELIUM_DEVELOPMENT                                       | GO_MACROMOLECULAR_COMPLEX_DISASSEMBLY                           |
|              |                    |    | GO_MACROMOLECULAR_COMPLEX_DISASSEMBLY                           | GO_CANONICAL_WNT_SIGNALING_PATHWAY                              |
|              |                    |    | GO_CANONICAL_WNT_SIGNALING_PATHWAY                              | GO_ANTERIOR_POSTERIOR_PATTERN_SPECIFICATION                     |
|              |                    |    | GO_ANTERIOR_POSTERIOR_PATTERN_SPECIFICATION                     | GO_PATTERN_SPECIFICATION_PROCESS                                |
|              |                    |    | GO_REGULATION_OF_INTRACELLULAR_PROTEIN_TRANSPORT                | GO_REGIONALIZATION                                              |
|              |                    |    | GO_PATTERN_SPECIFICATION_PROCESS                                | KEGG_BASAL_CELL_CARCINOMA                                       |
|              |                    |    | GO_REGIONALIZATION                                              |                                                                 |
|              |                    |    | GO_REGULATION_OF_PROTEIN_TARGETING                              |                                                                 |
|              |                    |    | GO_BETA_AMYLOID_BINDING                                         |                                                                 |
|              |                    |    | KEGG_BASAL_CELL_CARCINOMA                                       |                                                                 |
| IDH1         | C2orf80,IDH1       | 2  | GO_OXIDOREDUCTASE_ACTIVITY                                      | GO_OXIDOREDUCTASE_ACTIVITY                                      |
| IDH1-AS1     | C2orf80,IDH1       | 2  | NA                                                              | NA                                                              |
| JA429503     | C2orf80,IDH1       | 2  | NA                                                              | NA                                                              |
| LOC100507443 | C2orf80,IDH1       | 2  | NA                                                              | NA                                                              |
| MIR4775      | C2orf80,IDH1       | 2  | NA                                                              | NA                                                              |
| Mir_548      | C2orf80,IDH1       | 2  | NA                                                              | NA                                                              |
| PIKFYVE      | C2orf80,IDH1       | 2  | GO_REGULATION_OF_VACUOLE_ORGANIZATION                           | GO_REGULATION_OF_VACUOLE_ORGANIZATION                           |
|              |                    |    | GO_CYTOSOLIC_TRANSPORT                                          |                                                                 |
|              |                    |    | GO_PHOSPHATIDYLINOSITOL_PHOSPHATASE_ACTIVITY                    |                                                                 |
|              |                    |    | GO_PHOSPHATIDYLINOSITOL_PHOSPHATE_5_PHOSPHATASE_ACTIVITY        |                                                                 |
|              |                    |    | KEGG_INOSITOL_PHOSPHATE_METABOLISM                              |                                                                 |
|              |                    |    | REACTOME_PI_METABOLISM                                          |                                                                 |
| PLEKHM3      | C2orf80,IDH1       | 2  | NA                                                              | NA                                                              |
| PTH2R        | C2orf80,IDH1       | 2  | NA                                                              | NA                                                              |
| ALG3         | MAGEF1,LOC10192899 | 3  | NA                                                              | NA                                                              |
| C3orf70      | MAGEF1,LOC10192899 | 3  | NA                                                              | NA                                                              |
| CAMK2N2      | MAGEF1,LOC10192899 | 3  | NA                                                              | NA                                                              |
| CHR1         | MAGEF1,LOC10192899 | 3  | GO_EPITHELIUM_DEVELOPMENT                                       | GO_PATTERN_SPECIFICATION_PROCESS                                |
|              |                    |    | GO_PATTERN_SPECIFICATION_PROCESS                                | GO_REGIONALIZATION                                              |
|              |                    |    | GO_REGIONALIZATION                                              |                                                                 |
| CLCN2        | MAGEF1,LOC10192899 | 3  | NA                                                              | NA                                                              |
| ECE2         | MAGEF1,LOC10192899 | 3  | GO_CARDIOBLAST_DIFFERENTIATION                                  | GO_CARDIOBLAST_DIFFERENTIATION                                  |
|              |                    |    | GO_CARDIOCYTE_DIFFERENTIATION                                   |                                                                 |
| EHHADH       | MAGEF1,LOC10192899 | 3  | GO_OXIDOREDUCTASE_ACTIVITY                                      | GO_OXIDOREDUCTASE_ACTIVITY                                      |

|              |                    |    |                                                                                                                                                                                                                                                                                                                                                     |                                                                                                                                                                           |
|--------------|--------------------|----|-----------------------------------------------------------------------------------------------------------------------------------------------------------------------------------------------------------------------------------------------------------------------------------------------------------------------------------------------------|---------------------------------------------------------------------------------------------------------------------------------------------------------------------------|
| EHHADH-AS1   | MAGEF1,LOC10192899 | 3  | NA                                                                                                                                                                                                                                                                                                                                                  | NA                                                                                                                                                                        |
| EIF4G1       | MAGEF1,LOC10192899 | 3  | NA                                                                                                                                                                                                                                                                                                                                                  | NA                                                                                                                                                                        |
| EPHB3        | MAGEF1,LOC10192899 | 3  | GO_REGULATION_OF_CELL_MORPHOGENESIS_INVOLVED_IN_DIFFERENTIATION<br>GO_NEURON_PROJECTION_MORPHOGENESIS<br>GO_TUBE_MORPHOGENESIS<br>GO_NEURON_PROJECTION_GUIDANCE<br>GO_PROTEIN_AUTOPHOSPHORYLATION<br>GO_TRANSMEMBRANE_RECEPTOR_PROTEIN_KINASE_ACTIVITY<br>GO_TRANSMEMBRANE_RECEPTOR_PROTEIN_TYROSINE_KINASE_ACTIVITY<br>GO_EPHRIN_RECEPTOR_ACTIVITY | GO_NEURON_PROJECTION_MORPHOGENESIS                                                                                                                                        |
| FAM131A      | MAGEF1,LOC10192899 | 3  | NA                                                                                                                                                                                                                                                                                                                                                  | NA                                                                                                                                                                        |
| LOC101928992 | MAGEF1,LOC10192899 | 3  | NA                                                                                                                                                                                                                                                                                                                                                  | NA                                                                                                                                                                        |
| MAGEF1       | MAGEF1,LOC10192899 | 3  | NA                                                                                                                                                                                                                                                                                                                                                  | NA                                                                                                                                                                        |
| POLR2H       | MAGEF1,LOC10192899 | 3  | NA                                                                                                                                                                                                                                                                                                                                                  | NA                                                                                                                                                                        |
| PSMD2        | MAGEF1,LOC10192899 | 3  | GO_POSITIVE_REGULATION_OF_PROTEOLYSIS<br>GO_REGULATION_OF_PROTEOLYSIS                                                                                                                                                                                                                                                                               | NA                                                                                                                                                                        |
| SNORD66      | MAGEF1,LOC10192899 | 3  | NA                                                                                                                                                                                                                                                                                                                                                  | NA                                                                                                                                                                        |
| THPO         | MAGEF1,LOC10192899 | 3  | NA                                                                                                                                                                                                                                                                                                                                                  | NA                                                                                                                                                                        |
| TRNA_Asp     | MAGEF1,LOC10192899 | 3  | NA                                                                                                                                                                                                                                                                                                                                                  | NA                                                                                                                                                                        |
| VPS8         | MAGEF1,LOC10192899 | 3  | NA                                                                                                                                                                                                                                                                                                                                                  | NA                                                                                                                                                                        |
| VWASB2       | MAGEF1,LOC10192899 | 3  | NA                                                                                                                                                                                                                                                                                                                                                  | NA                                                                                                                                                                        |
| MIR1224      | MAGEF1,LOC10192899 | 3  | NA                                                                                                                                                                                                                                                                                                                                                  | NA                                                                                                                                                                        |
| PARL         | MAGEF1,LOC10192899 | 3  | GO_NEGATIVE_REGULATION_OF_INTRINSIC_APOPTOTIC_SIGNALING_PATHWAY<br>GO_REGULATION_OF_INTRACELLULAR_PROTEIN_TRANSPORT<br>GO_REGULATION_OF_PROTEOLYSIS<br>GO_REGULATION_OF_INTRINSIC_APOPTOTIC_SIGNALING_PATHWAY<br>GO_REGULATION_OF_PROTEIN_TARGETING<br>GO_REGULATION_OF_APOPTOTIC_SIGNALING_PATHWAY                                                 | GO_NEGATIVE_REGULATION_OF_INTRINSIC_APOPTOTIC_SIGNALING_PATHWAY<br>GO_REGULATION_OF_INTRINSIC_APOPTOTIC_SIGNALING_PATHWAY<br>GO_REGULATION_OF_APOPTOTIC_SIGNALING_PATHWAY |
| ABCC5        | MAGEF1,LOC10192899 | 3  | NA                                                                                                                                                                                                                                                                                                                                                  | NA                                                                                                                                                                        |
| MIR4801      | HTN1               | 4  | NA                                                                                                                                                                                                                                                                                                                                                  | NA                                                                                                                                                                        |
| NWD2         | HTN1               | 4  | NA                                                                                                                                                                                                                                                                                                                                                  | NA                                                                                                                                                                        |
| ARAP2        | HTN1               | 4  | NA                                                                                                                                                                                                                                                                                                                                                  | NA                                                                                                                                                                        |
| DTHD1        | HTN1               | 4  | NA                                                                                                                                                                                                                                                                                                                                                  | NA                                                                                                                                                                        |
| AMTN         | HTN1               | 4  | NA                                                                                                                                                                                                                                                                                                                                                  | NA                                                                                                                                                                        |
| C4orf40      | HTN1               | 4  | NA                                                                                                                                                                                                                                                                                                                                                  | NA                                                                                                                                                                        |
| CABS1        | HTN1               | 4  | NA                                                                                                                                                                                                                                                                                                                                                  | NA                                                                                                                                                                        |
| CSN1S1       | HTN1               | 4  | NA                                                                                                                                                                                                                                                                                                                                                  | NA                                                                                                                                                                        |
| CSN1S2AP     | HTN1               | 4  | NA                                                                                                                                                                                                                                                                                                                                                  | NA                                                                                                                                                                        |
| CSN1S2BP     | HTN1               | 4  | NA                                                                                                                                                                                                                                                                                                                                                  | NA                                                                                                                                                                        |
| CSN2         | HTN1               | 4  | NA                                                                                                                                                                                                                                                                                                                                                  | NA                                                                                                                                                                        |
| CSN3         | HTN1               | 4  | NA                                                                                                                                                                                                                                                                                                                                                  | NA                                                                                                                                                                        |
| FDCSP        | HTN1               | 4  | NA                                                                                                                                                                                                                                                                                                                                                  | NA                                                                                                                                                                        |
| HTN1         | HTN1               | 4  | NA                                                                                                                                                                                                                                                                                                                                                  | NA                                                                                                                                                                        |
| HTN3         | HTN1               | 4  | NA                                                                                                                                                                                                                                                                                                                                                  | NA                                                                                                                                                                        |
| MUC7         | HTN1               | 4  | NA                                                                                                                                                                                                                                                                                                                                                  | NA                                                                                                                                                                        |
| ODAM         | HTN1               | 4  | NA                                                                                                                                                                                                                                                                                                                                                  | NA                                                                                                                                                                        |
| PROL1        | HTN1               | 4  | GO_REGULATION_OF_PROTEOLYSIS                                                                                                                                                                                                                                                                                                                        | NA                                                                                                                                                                        |
| PRR27        | HTN1               | 4  | NA                                                                                                                                                                                                                                                                                                                                                  | NA                                                                                                                                                                        |
| SMR3A        | HTN1               | 4  | NA                                                                                                                                                                                                                                                                                                                                                  | NA                                                                                                                                                                        |
| SMR3B        | HTN1               | 4  | NA                                                                                                                                                                                                                                                                                                                                                  | NA                                                                                                                                                                        |
| STATH        | HTN1               | 4  | NA                                                                                                                                                                                                                                                                                                                                                  | NA                                                                                                                                                                        |
| SULT1B1      | HTN1               | 4  | GO_EPITHELIUM_DEVELOPMENT<br>GO_TRANSFERASE_ACTIVITY_TRANSFERRING_SULFUR_CONTAINING_GROUPS                                                                                                                                                                                                                                                          | GO_TRANSFERASE_ACTIVITY_TRANSFERRING_SULFUR_CONTAINING_GROUPS                                                                                                             |
| SULT1E1      | HTN1               | 4  | GO_TRANSFERASE_ACTIVITY_TRANSFERRING_SULFUR_CONTAINING_GROUPS                                                                                                                                                                                                                                                                                       | GO_TRANSFERASE_ACTIVITY_TRANSFERRING_SULFUR_CONTAINING_GROUPS                                                                                                             |
| UGT2A1       | HTN1               | 4  | NA                                                                                                                                                                                                                                                                                                                                                  | NA                                                                                                                                                                        |
| UGT2A2       | HTN1               | 4  | NA                                                                                                                                                                                                                                                                                                                                                  | NA                                                                                                                                                                        |
| CRSF1        | HTN1               | 4  | NA                                                                                                                                                                                                                                                                                                                                                  | NA                                                                                                                                                                        |
| UTP3         | HTN1               | 4  | GO_CHROMATIN_MODIFICATION                                                                                                                                                                                                                                                                                                                           | GO_CHROMATIN_MODIFICATION                                                                                                                                                 |
| DCK          | HTN1               | 4  | NA                                                                                                                                                                                                                                                                                                                                                  | NA                                                                                                                                                                        |
| MOB1B        | HTN1               | 4  | NA                                                                                                                                                                                                                                                                                                                                                  | NA                                                                                                                                                                        |
| ATP5B        | HSD17B6,SDR9C7     | 12 | GO_NUCLEOSIDE_TRIPHOSPHATE_METABOLIC_PROCESS<br>GO_MITOCHONDRION_ORGANIZATION<br>GO_MITOCHONDRIAL_MATRIX<br>GO_MITOCHONDRIAL_MEMBRANE_PART<br>GO_PROTON_TRANSPORTING_ATP_SYNTHASE_COMPLEX<br>KEGG_PARKINSONS_DISEASE                                                                                                                                | GO_NUCLEOSIDE_TRIPHOSPHATE_METABOLIC_PROCESS                                                                                                                              |
| BAZ2A        | HSD17B6,SDR9C7     | 12 | GO_MACROMOLECULE_DEACYLATION<br>GO_CHROMATIN_MODIFICATION                                                                                                                                                                                                                                                                                           | GO_MACROMOLECULE_DEACYLATION                                                                                                                                              |
| BC059370     | HSD17B6,SDR9C7     | 12 | NA                                                                                                                                                                                                                                                                                                                                                  | NA                                                                                                                                                                        |

|           |                |                                                                                                                                                                                                                |                                                                                                                               |
|-----------|----------------|----------------------------------------------------------------------------------------------------------------------------------------------------------------------------------------------------------------|-------------------------------------------------------------------------------------------------------------------------------|
| DQ590166  | HSD17B6,SDR9C7 | 12 NA                                                                                                                                                                                                          | NA                                                                                                                            |
| GLS2      | HSD17B6,SDR9C7 | 12 GO_REGULATION_OF_INTRACELLULAR_PROTEIN_TRANSPORT<br>GO_REGULATION_OF_PROTEIN_TARGETING<br>GO_MITOCHONDRIAL_MATRIX<br>GO_HYDROLASE_ACTIVITY_ACTING_ON_CARBON_NITROGEN_BUT_NOT_PEPTIDE_BONDS_IN_LINEAR_AMIDES | GO_MITOCHONDRIAL_MATRIX<br>GO_HYDROLASE_ACTIVITY_ACTING_ON_CARBON_NITROGEN_BUT_NOT_PEPTIDE_BONDS_IN_LINEAR_AMIDES             |
| GPR182    | HSD17B6,SDR9C7 | 12 NA                                                                                                                                                                                                          | NA                                                                                                                            |
| HSD17B6   | HSD17B6,SDR9C7 | 12 GO_HORMONE_BIOSYNTHETIC_PROCESS<br>GO ESTRADIOL_17_BETA_DEHYDROGENASE_ACTIVITY<br>GO ELECTRON_CARRIER_ACTIVITY<br>GO_OXIDOREDUCTASE_ACTIVITY                                                                | GO_HORMONE_BIOSYNTHETIC_PROCESS                                                                                               |
| KIAA1002  | HSD17B6,SDR9C7 | 12 NA                                                                                                                                                                                                          | NA                                                                                                                            |
| LRP1      | HSD17B6,SDR9C7 | 12 NA                                                                                                                                                                                                          | NA                                                                                                                            |
| MIP       | HSD17B6,SDR9C7 | 12 GO_PROTEIN_HOMOTETRAMERIZATION<br>GO_PROTEIN_HOMOOIGOMERIZATION                                                                                                                                             | GO_PROTEIN_HOMOTETRAMERIZATION<br>GO_PROTEIN_HOMOOIGOMERIZATION                                                               |
| MIR1228   | HSD17B6,SDR9C7 | 12 NA                                                                                                                                                                                                          | NA                                                                                                                            |
| MYO1A     | HSD17B6,SDR9C7 | 12 GO_VESICLE_LOCALIZATION<br>GO_MICROVILLUS<br>GO_ACTIN_BASED_CELL_PROJECTION                                                                                                                                 | GO_MICROVILLUS                                                                                                                |
| NAB2      | HSD17B6,SDR9C7 | 12 GO_PERIPHERAL_NERVOUS_SYSTEM_DEVELOPMENT<br>GO_EXTRINSIC_COMPONENT_OF_PLASMA_MEMBRANE<br>GO_OXIDOREDUCTASE_ACTIVITY                                                                                         | GO_PERIPHERAL_NERVOUS_SYSTEM_DEVELOPMENT                                                                                      |
| NACA      | HSD17B6,SDR9C7 | 12 GO_REGULATION_OF_DEVELOPMENTAL_GROWTH<br>GO_REGULATION_OF_GROWTH<br>GO_REGULATION_OF_HEART_MORPHOGENESIS<br>GO_GROWTH<br>GO_DEVELOPMENTAL_GROWTH<br>GO_TRANSCRIPTION_COACTIVATOR_ACTIVITY                   | GO_REGULATION_OF_HEART_MORPHOGENESIS                                                                                          |
| NDUFA4L2  | HSD17B6,SDR9C7 | 12 KEGG_PARKINSONS_DISEASE                                                                                                                                                                                     | KEGG_PARKINSONS_DISEASE                                                                                                       |
| NXP4      | HSD17B6,SDR9C7 | 12 NA                                                                                                                                                                                                          | NA                                                                                                                            |
| PRIM1     | HSD17B6,SDR9C7 | 12 NA                                                                                                                                                                                                          | NA                                                                                                                            |
| PTGES3    | HSD17B6,SDR9C7 | 12 GO_PROTEIN_REFOLDING<br>GO_DNA_POLYMERASE_ACTIVITY                                                                                                                                                          | GO_PROTEIN_REFOLDING                                                                                                          |
| R3HDM2    | HSD17B6,SDR9C7 | 12 NA                                                                                                                                                                                                          | NA                                                                                                                            |
| RBMS2     | HSD17B6,SDR9C7 | 12 NA                                                                                                                                                                                                          | NA                                                                                                                            |
| RDH16     | HSD17B6,SDR9C7 | 12 GO ELECTRON_CARRIER_ACTIVITY<br>GO_OXIDOREDUCTASE_ACTIVITY                                                                                                                                                  | GO ELECTRON_CARRIER_ACTIVITY                                                                                                  |
| SDR9C7    | HSD17B6,SDR9C7 | 12 GO_OXIDOREDUCTASE_ACTIVITY                                                                                                                                                                                  | GO_OXIDOREDUCTASE_ACTIVITY                                                                                                    |
| SHMT2     | HSD17B6,SDR9C7 | 12 GO_PROTEIN_HOMOTETRAMERIZATION<br>GO_ONE_CARBON_METABOLIC_PROCESS<br>GO_PROTEIN_HOMOOIGOMERIZATION<br>GO_MITOCHONDRIAL_MATRIX                                                                               | GO_PROTEIN_HOMOTETRAMERIZATION<br>GO_ONE_CARBON_METABOLIC_PROCESS<br>GO_PROTEIN_HOMOOIGOMERIZATION<br>GO_MITOCHONDRIAL_MATRIX |
| SNORD59A  | HSD17B6,SDR9C7 | 12 NA                                                                                                                                                                                                          | NA                                                                                                                            |
| SNORD59B  | HSD17B6,SDR9C7 | 12 NA                                                                                                                                                                                                          | NA                                                                                                                            |
| SPRY4     | HSD17B6,SDR9C7 | 12 NA                                                                                                                                                                                                          | NA                                                                                                                            |
| STAC3     | HSD17B6,SDR9C7 | 12 NA                                                                                                                                                                                                          | NA                                                                                                                            |
| STAT6     | HSD17B6,SDR9C7 | 12 GO_EPITHELIUM_DEVELOPMENT<br>GO_CELL_FATE_COMMITMENT                                                                                                                                                        | GO_CELL_FATE_COMMITMENT                                                                                                       |
| TAC3      | HSD17B6,SDR9C7 | 12 NA                                                                                                                                                                                                          | NA                                                                                                                            |
| TIMELESS  | HSD17B6,SDR9C7 | 12 GO_EPITHELIUM_DEVELOPMENT<br>GO_TUBE_MORPHOGENESIS                                                                                                                                                          | GO_TUBE_MORPHOGENESIS                                                                                                         |
| TMEM194A  | HSD17B6,SDR9C7 | 12 NA                                                                                                                                                                                                          | NA                                                                                                                            |
| ZBTB39    | HSD17B6,SDR9C7 | 12 NA                                                                                                                                                                                                          | NA                                                                                                                            |
| LPHN2     | LPHN2          | 1 NA                                                                                                                                                                                                           | NA                                                                                                                            |
| ADI1      | LINC01250      | 2 GO_OXIDOREDUCTASE_ACTIVITY                                                                                                                                                                                   | GO_OXIDOREDUCTASE_ACTIVITY                                                                                                    |
| LINC01250 | LINC01250      | 2 NA                                                                                                                                                                                                           | NA                                                                                                                            |
| RNASEH1   | LINC01250      | 2 NA                                                                                                                                                                                                           | NA                                                                                                                            |
| TRAPPC12  | LINC01250      | 2 NA                                                                                                                                                                                                           | NA                                                                                                                            |
| TSSC1     | LINC01250      | 2 NA                                                                                                                                                                                                           | NA                                                                                                                            |
| ALLC      | LINC01250      | 2 NA                                                                                                                                                                                                           | NA                                                                                                                            |
| RPS7      | LINC01250      | 2 GO_EPITHELIUM_DEVELOPMENT<br>GO_TUBE_MORPHOGENESIS                                                                                                                                                           | GO_TUBE_MORPHOGENESIS                                                                                                         |
| ATP6V1C2  | KCNF1,FLJ33534 | 2 NA                                                                                                                                                                                                           | NA                                                                                                                            |
| AX746649  | KCNF1,FLJ33534 | 2 NA                                                                                                                                                                                                           | NA                                                                                                                            |
| C2orf50   | KCNF1,FLJ33534 | 2 NA                                                                                                                                                                                                           | NA                                                                                                                            |
| E2f6      | KCNF1,FLJ33534 | 2 NA                                                                                                                                                                                                           | NA                                                                                                                            |
| FLJ33534  | KCNF1,FLJ33534 | 2 NA                                                                                                                                                                                                           | NA                                                                                                                            |
| KCNF1     | KCNF1,FLJ33534 | 2 GO_PROTEIN_HOMOOIGOMERIZATION<br>GO_DELAYED_RECTIFIER_POTASSIUM_CHANNEL_ACTIVITY                                                                                                                             | GO_PROTEIN_HOMOOIGOMERIZATION                                                                                                 |
| LINC00570 | KCNF1,FLJ33534 | 2 NA                                                                                                                                                                                                           | NA                                                                                                                            |

|              |                |                                                |                                              |
|--------------|----------------|------------------------------------------------|----------------------------------------------|
| LOC101929733 | KCNF1,FLJ33534 | 2 NA                                           | NA                                           |
| NOL10        | KCNF1,FLJ33534 | 2 NA                                           | NA                                           |
| PDIA6        | KCNF1,FLJ33534 | 2 NA                                           | NA                                           |
| PQLC3        | KCNF1,FLJ33534 | 2 NA                                           | NA                                           |
| ROCK2        | KCNF1,FLJ33534 | 2 GO_SMALL_GTPASE_MEDIATED_SIGNAL_TRANSDUCTION | GO_SMALL_GTPASE_MEDIATED_SIGNAL_TRANSDUCTION |
| CYS1         | KCNF1,FLJ33534 | 2 NA                                           | NA                                           |
| PRM2         | KCNF1,FLJ33534 | 2 NA                                           | NA                                           |
| NTS2R        | KCNF1,FLJ33534 | 2 NA                                           | NA                                           |
| GREB1        | KCNF1,FLJ33534 | 2 NA                                           | NA                                           |
